# Supplementary material
Source: PubMed Central journal article supplement (PMC4084756)
Supplement: NIHMS481943-supplement-1_si_002.pdf [file NIHMS481943-supplement-1_si_002.pdf]

**Terminal Olefins to Linear  $\alpha,\beta$ -Unsaturated Ketones:  
Pd(II)/Hypervalent Iodine Co-Catalyzed Wacker-Dehydrogenation**

Marinus A. Bigi and M. Christina White\*

*Roger Adams Laboratory, Department of Chemistry, University of Illinois, Urbana, Illinois 61801*

**Supporting Information: Spectral Data**

expl s2pul

| SAMPLE      |             | DEC. & VT  |          |
|-------------|-------------|------------|----------|
| date        | Feb 12 2013 | dfrq       | 500.070  |
| solvent     | CDC13       | dn         | H1       |
| file        | exp         | dpwr       | 18       |
| ACQUISITION |             | dof        |          |
| sfrq        | 500.070     | dm         | nnn      |
| tn          | H1          | dmm        | c        |
| at          | 4.096       | dmf        | 200      |
| np          | 65536       | dseq       |          |
| sw          | 8000.0      | dres       | 1.0      |
| fb          | 4000        | homo       | n        |
| bs          | 16          | DEC2       |          |
| tpwr        | 58          | dfrq2      | 0        |
| pw          | 6.5         | dn2        |          |
| d1          | 15.000      | dpwr2      | 1        |
| tof         | 0           | dof2       | 0        |
| nt          | 4           | dm2        | n        |
| ct          | 4           | dmm2       | c        |
| alock       | n           | dmf2       | 200      |
| gain        | not used    | dseq2      |          |
| FLAGS       |             | dres2      |          |
| il          | n           | homo2      | n        |
| in          | n           | PROCESSING |          |
| dp          | y           | lb         | 0.30     |
| hs          | nn          | wtfile     |          |
| DISPLAY     |             | proc       |          |
| sp          | -1007.0     | fn         | not used |
| wp          | 6992.4      | math       | f        |
| vs          | 38          |            |          |
| sc          | 0           | werr       |          |
| wc          | 250         | wexp       |          |
| hzmm        | 27.97       | wbs        |          |
| is          | 33.57       | wnt        |          |
| rfl         | 5141.1      |            |          |
| rfp         | 3630.5      |            |          |
| th          | 7           |            |          |
| ins         | 100.000     |            |          |
| ai          | ph          |            |          |

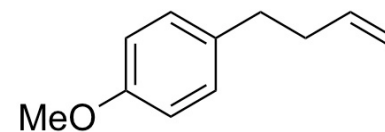

11 10 9 8 7 6 5 4 3 2 1 -0 -1 ppm

S18

expl s2pul

| SAMPLE      |             | DEC. & VT  |         |
|-------------|-------------|------------|---------|
| date        | Feb 12 2013 | dfrq       | 499.692 |
| solvent     | CDC13       | dn         | H1      |
| file        | exp         | dpwr       | 45      |
| ACQUISITION |             | dof        |         |
| sfrq        | 125.661     | dm         | YYY     |
| tn          | C13         | dmm        | w       |
| at          | 1.086       | dmf        | 20202   |
| np          | 65536       | dseq       |         |
| sw          | 30165.9     | dres       | 90.0    |
| fb          | 17000       | homo       | n       |
| bs          | 16          | DEC2       |         |
| ss          | 1           | dfrq2      | 0       |
| tpwr        | 60          | dn2        |         |
| pw          | 6.0         | dpwr2      | 1       |
| d1          | 1.000       | dof2       | 0       |
| tof         | 1884.7      | dm2        | n       |
| nt          | 1200        | dmm2       | c       |
| ct          | 162         | dmf2       | 10000   |
| alock       | n           | dseq2      |         |
| gain        | not used    | dres2      | 1.0     |
| FLAGS       |             | homo2      |         |
| il          | n           | PROCESSING |         |
| in          | n           | lb         | 1.00    |
| dp          | y           | wtfile     |         |
| hs          | nn          | proc       | ft      |
| DISPLAY     |             | fn         |         |
| sp          | 55.4        | math       | f       |
| wp          | 27546.8     |            |         |
| vs          | 162         | werr       |         |
| sc          | 0           | wexp       |         |
| wc          | 250         | wbs        |         |
| hzmm        | 110.19      | wnt        |         |
| is          | 500.00      |            |         |
| rfl         | 10970.7     |            |         |
| rfp         | 9694.9      |            |         |
| th          | 16          |            |         |
| ins         | 100.000     |            |         |
| nm          | ph          |            |         |

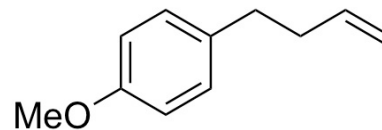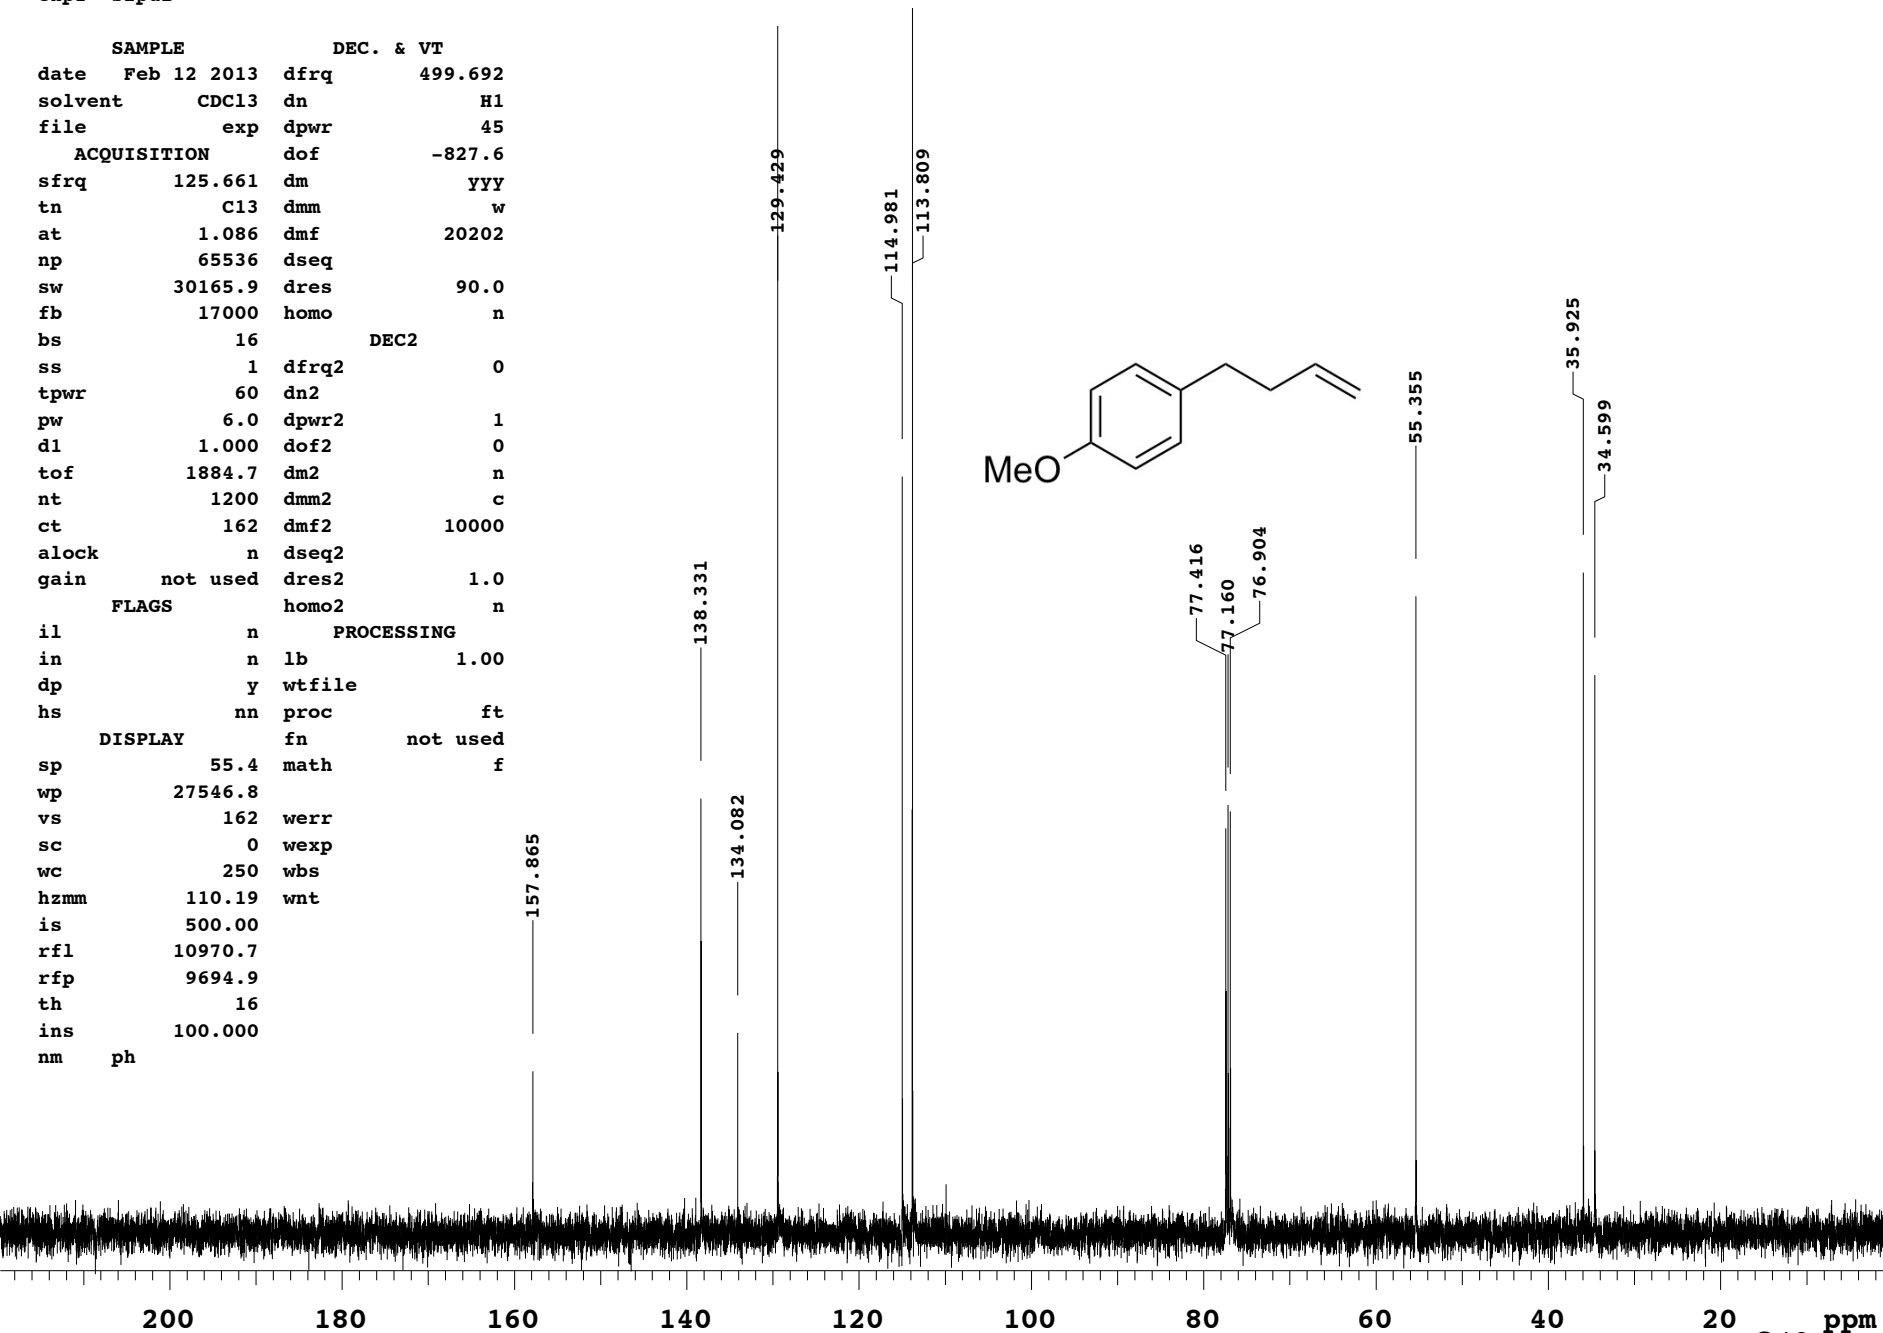

expl std1h

| SAMPLE              |                | DEC. & VT |     |
|---------------------|----------------|-----------|-----|
| date                | Nov 2 2011     | dn        | H1  |
| solvent             | CDC13          | dof       | 0   |
| file                | /export/home/~ | dm        | nnn |
| data/ui400/White/b- | dmm            | c         |     |
| igi/MAB.1355A.colu- | dmf            | 200       |     |
| mned.fid            | dpwr           | 20        |     |

| ACQUISITION |         | PROCESSING |          |
|-------------|---------|------------|----------|
| sfrq        | 399.741 | lb         | 0.30     |
| tn          | H1      | wtfile     |          |
| at          | 4.096   | proc       | ft       |
| np          | 65536   | fn         | not used |
| sw          | 8000.0  | math       | f        |
| fb          | 4000    |            |          |
| bs          | 16      | werr       |          |
| tpwr        | 61      | wexp       |          |
| pw          | 5.8     | wbs        |          |
| d1          | 0       | wnt        |          |

|       |          | DISPLAY |         |
|-------|----------|---------|---------|
| nt    | 16       | sp      | -812.7  |
| ct    | 16       | wp      | 5600.8  |
| alock | n        | vs      | 79      |
| gain  | not used | sc      | 0       |
| FLAGS |          | wc      | 250     |
| il    | n        | hzmm    | 22.40   |
| in    | n        | is      | 500.00  |
| dp    | y        | rfl     | 5322.0  |
| hs    | nn       | rfp     | 2902.1  |
|       |          | th      | 20      |
|       |          | ins     | 100.000 |
|       |          | nm      | ph      |

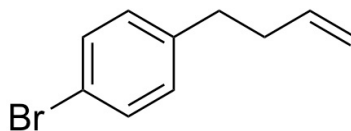

11 10 9 8 7 6 5 4 3 2 1 -0 -1 ppm

S20

expl s2pul

| SAMPLE      |             | DEC. & VT  |         |
|-------------|-------------|------------|---------|
| date        | Feb 12 2013 | dfrq       | 499.692 |
| solvent     | CDC13       | dn         | H1      |
| file        | exp         | dpwr       | 45      |
| ACQUISITION |             | dof        |         |
| sfrq        | 125.661     | dm         | YYY     |
| tn          | C13         | dmm        | w       |
| at          | 1.086       | dmf        | 20202   |
| np          | 65536       | dseq       |         |
| sw          | 30165.9     | dres       | 90.0    |
| fb          | 17000       | homo       | n       |
| bs          | 16          | DEC2       |         |
| ss          | 1           | dfrq2      | 0       |
| tpwr        | 60          | dn2        |         |
| pw          | 6.0         | dpwr2      | 1       |
| d1          | 1.000       | dof2       | 0       |
| tof         | 1884.7      | dm2        | n       |
| nt          | 1200        | dmm2       | c       |
| ct          | 67          | dmf2       | 10000   |
| alock       | n           | dseq2      |         |
| gain        | not used    | dres2      | 1.0     |
| FLAGS       |             | homo2      |         |
| il          | n           | PROCESSING |         |
| in          | n           | lb         | 1.00    |
| dp          | y           | wtfile     |         |
| hs          | nn          | proc       | ft      |
| DISPLAY     |             | fn         |         |
| sp          | -32.0       | math       | f       |
| wp          | 27724.5     |            |         |
| vs          | 162         | werr       |         |
| sc          | 0           | wexp       |         |
| wc          | 250         | wbs        |         |
| hzmm        | 110.90      | wnt        |         |
| is          | 500.00      |            |         |
| rfl         | 10969.8     |            |         |
| rfp         | 9694.9      |            |         |
| th          | 20          |            |         |
| ins         | 100.000     |            |         |
| nm          | ph          |            |         |

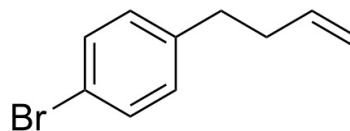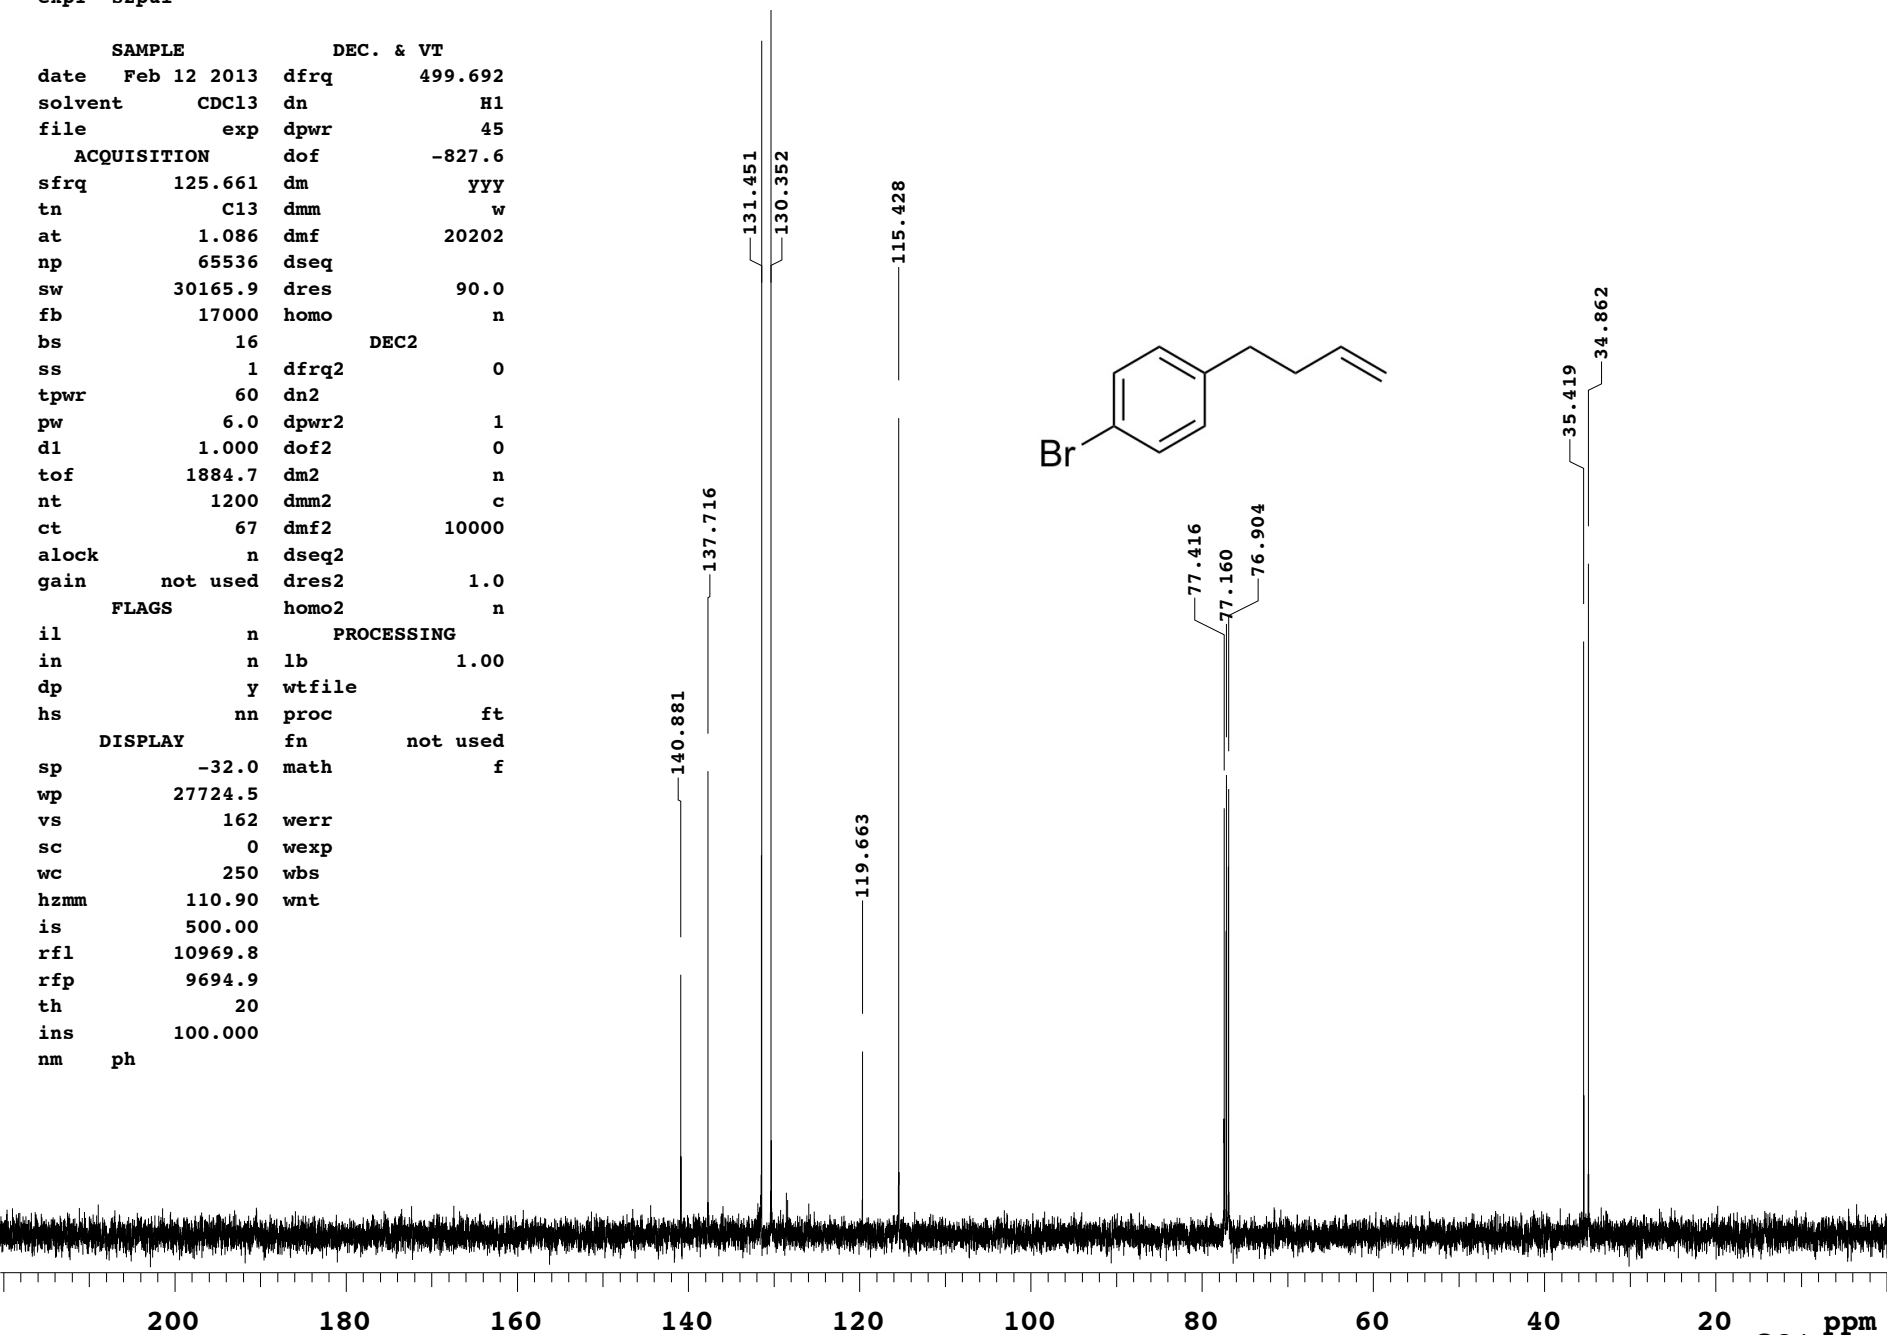

expl s2pul

| SAMPLE              |                | DEC. & VT  |          |
|---------------------|----------------|------------|----------|
| date                | Aug 3 2012     | dfrq       | 500.070  |
| solvent             | CDC13          | dn         | H1       |
| file                | /export/home/~ | dpwr       | 18       |
| data/ui500nb/White~ |                | dof        | 0        |
| /bigi/MAB.1575A.co~ |                | dm         | nnn      |
| lunned.fid          |                | dmm        | c        |
| ACQUISITION         |                |            |          |
| sfrq                | 500.070        | dseq       |          |
| tn                  | H1             | dres       | 1.0      |
| at                  | 4.096          | homo       | n        |
| np                  | 65536          | DEC2       |          |
| sw                  | 8000.0         | dfrq2      | 0        |
| fb                  | 4000           | dn2        |          |
| bs                  | 16             | dpwr2      | 1        |
| tpwr                | 58             | dof2       | 0        |
| pw                  | 6.5            | dm2        | n        |
| d1                  | 10.000         | dmm2       | c        |
| tof                 | 0              | dmf2       | 200      |
| nt                  | 4              | dseq2      |          |
| ct                  | 4              | dres2      | 1.0      |
| alock               | n              | homo2      | n        |
| gain                | not used       | PROCESSING |          |
| FLAGS               |                | lb         | 0.30     |
| il                  | n              | wtfile     |          |
| in                  | n              | proc       | ft       |
| dp                  | y              | fn         | not used |
| hs                  | nn             | math       | f        |
| DISPLAY             |                |            |          |
| sp                  | -990.6         | werr       |          |
| wp                  | 6995.1         | wexp       |          |
| vs                  | 58             | wbs        |          |
| sc                  | 0              | wnt        |          |
| wc                  | 250            |            |          |
| hzmm                | 27.98          |            |          |
| is                  | 33.57          |            |          |
| rfl                 | 5141.1         |            |          |
| rfp                 | 3630.5         |            |          |
| th                  | 7              |            |          |
| ins                 | 100.000        |            |          |
| ai                  | ph             |            |          |

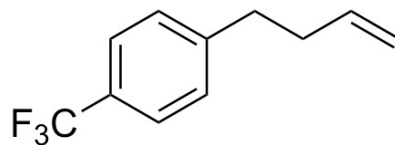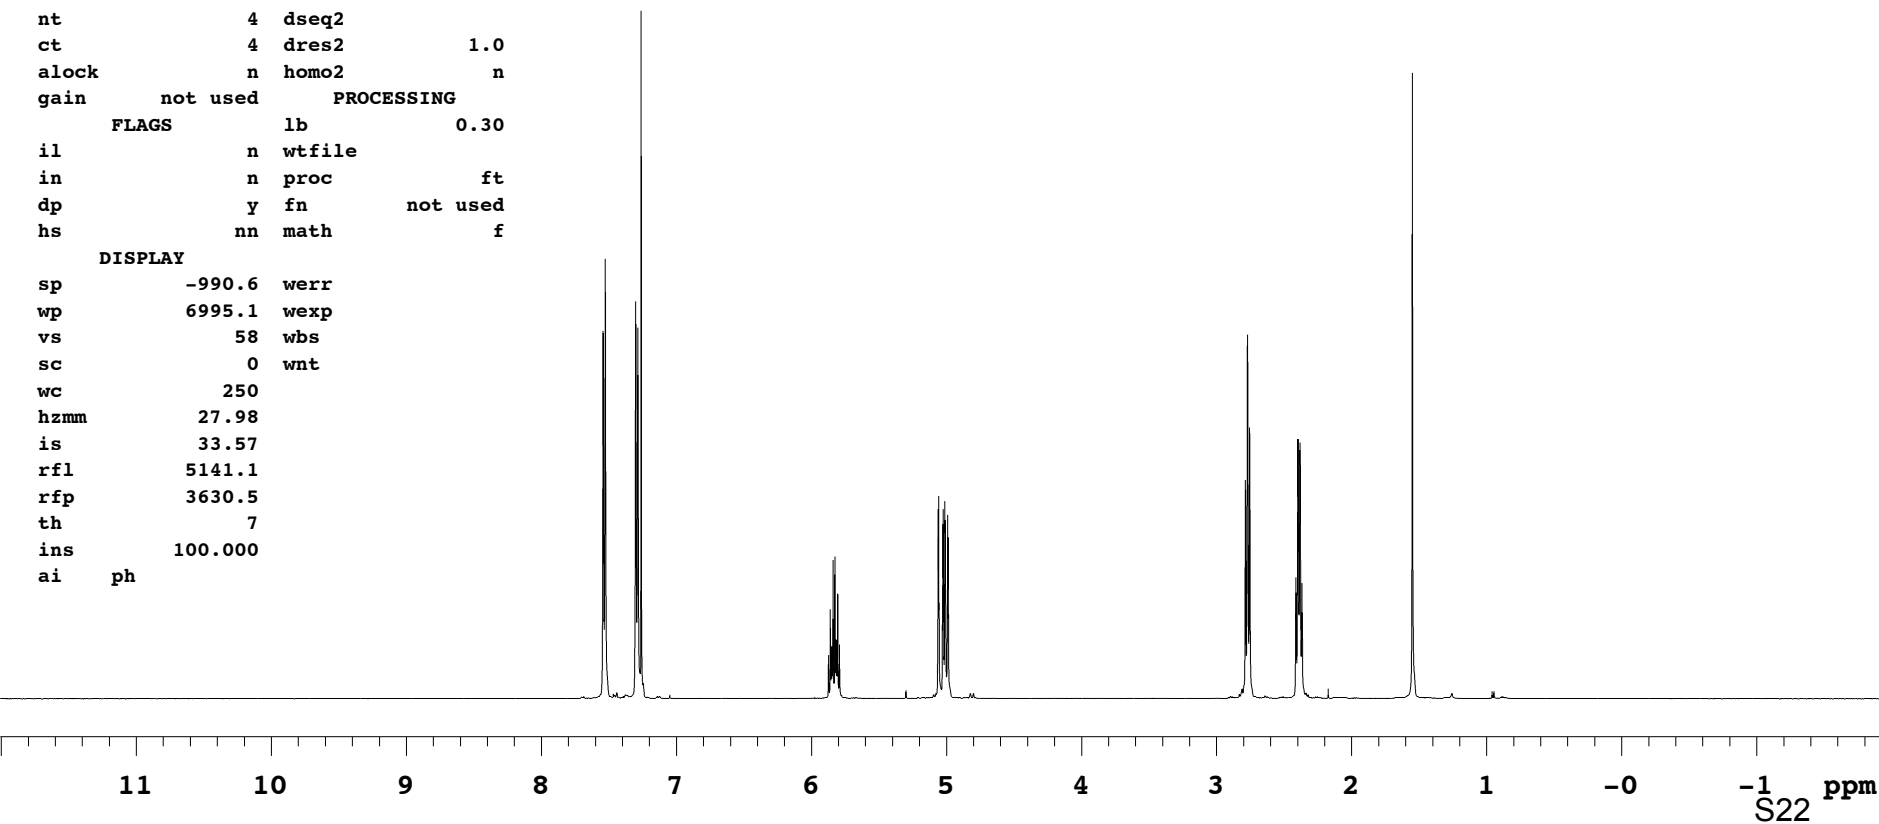

expl s2pul

| SAMPLE      |             | DEC. & VT  |         |
|-------------|-------------|------------|---------|
| date        | Feb 12 2013 | dfrq       | 499.432 |
| solvent     | CDC13       | dn         | H1      |
| file        | exp         | dpwr       | 47      |
| ACQUISITION |             | dof        |         |
| sfrq        | 125.596     | dm         | YYY     |
| tn          | C13         | dmm        | w       |
| at          | 1.024       | dmf        | 15873   |
| np          | 65536       | dseq       |         |
| sw          | 32000.0     | dres       | 1.0     |
| fb          | 18000       | homo       | n       |
| bs          | 16          | DEC2       |         |
| ss          | 1           | dfrq2      | 0       |
| tpwr        | 63          | dn2        |         |
| pw          | 4.5         | dpwr2      | 1       |
| d1          | 1.000       | dof2       | 0       |
| tof         | 1880.0      | dm2        | n       |
| nt          | 12000       | dmm2       | c       |
| ct          | 371         | dmf2       | 18519   |
| alock       | n           | dseq2      |         |
| gain        | not used    | dres2      | 1.0     |
| FLAGS       |             | homo2      |         |
| il          | n           | PROCESSING |         |
| in          | n           | lb         | 1.00    |
| dp          | y           | wtfile     |         |
| hs          | nn          | proc       | ft      |
| DISPLAY     |             | fn         |         |
| sp          | 53.2        | math       | f       |
| wp          | 27587.9     |            |         |
| vs          | 162         | werr       |         |
| sc          | 0           | wexp       |         |
| wc          | 250         | wbs        |         |
| hzmm        | 110.35      | wnt        |         |
| is          | 500.00      |            |         |
| rfl         | 11888.7     |            |         |
| rfp         | 9689.9      |            |         |
| th          | 7           |            |         |
| ins         | 100.000     |            |         |
| nm          | ph          |            |         |

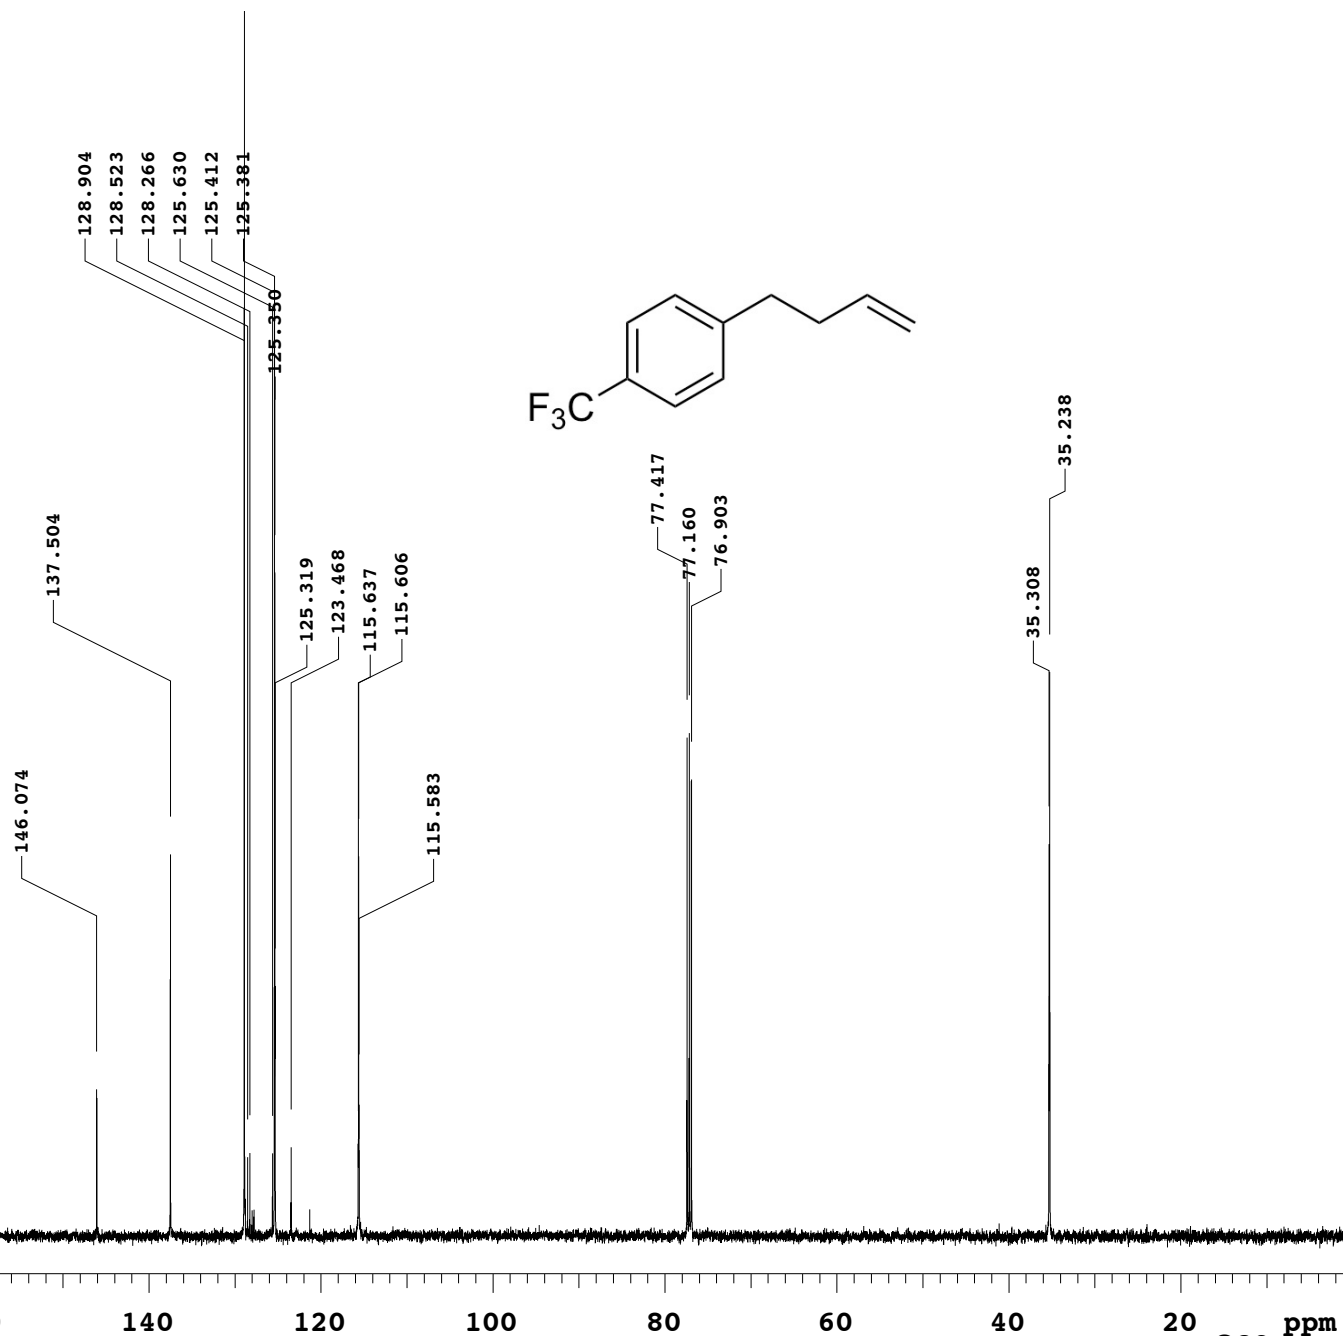

expl s2pul

SAMPLE DEC. & VT  
 date May 21 2012 dfrq 500.070  
 solvent CDC13 dn H1  
 file /export/home/~ dpwr 18  
 data/ui500nb/White~ dof 0  
 /bigi/MAB.1511A.pl~ dm nnn  
 ugged.fid dmm c

ACQUISITION dmf 200  
 sfrq 500.070 dseq  
 tn H1 dres 1.0  
 at 4.096 homo n  
 np 65536 DEC2  
 sw 8000.0 dfrq2 0  
 fb 4000 dn2  
 bs 16 dpwr2 1  
 tpwr 58 dof2 0  
 pw 6.5 dm2 n  
 d1 10.000 dmm2 c  
 tof 0 dmf2 200  
 nt 4 dseq2  
 ct 4 dres2 1.0  
 alock n homo2 n

gain not used PROCESSING  
 FLAGS lb 0.30  
 il n wtfile  
 in n proc ft  
 dp y fn not used  
 hs nn math f

DISPLAY  
 sp -1002.1 werr  
 wp 6996.3 wexp  
 vs 29 wbs  
 sc 0 wnt  
 wc 250  
 hzmm 27.99  
 is 33.57  
 rfl 5141.4  
 rfp 3630.5  
 th 7  
 ins 100.000  
 ai ph

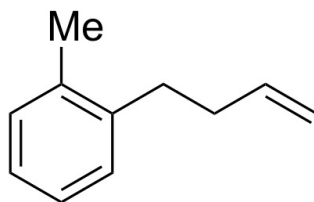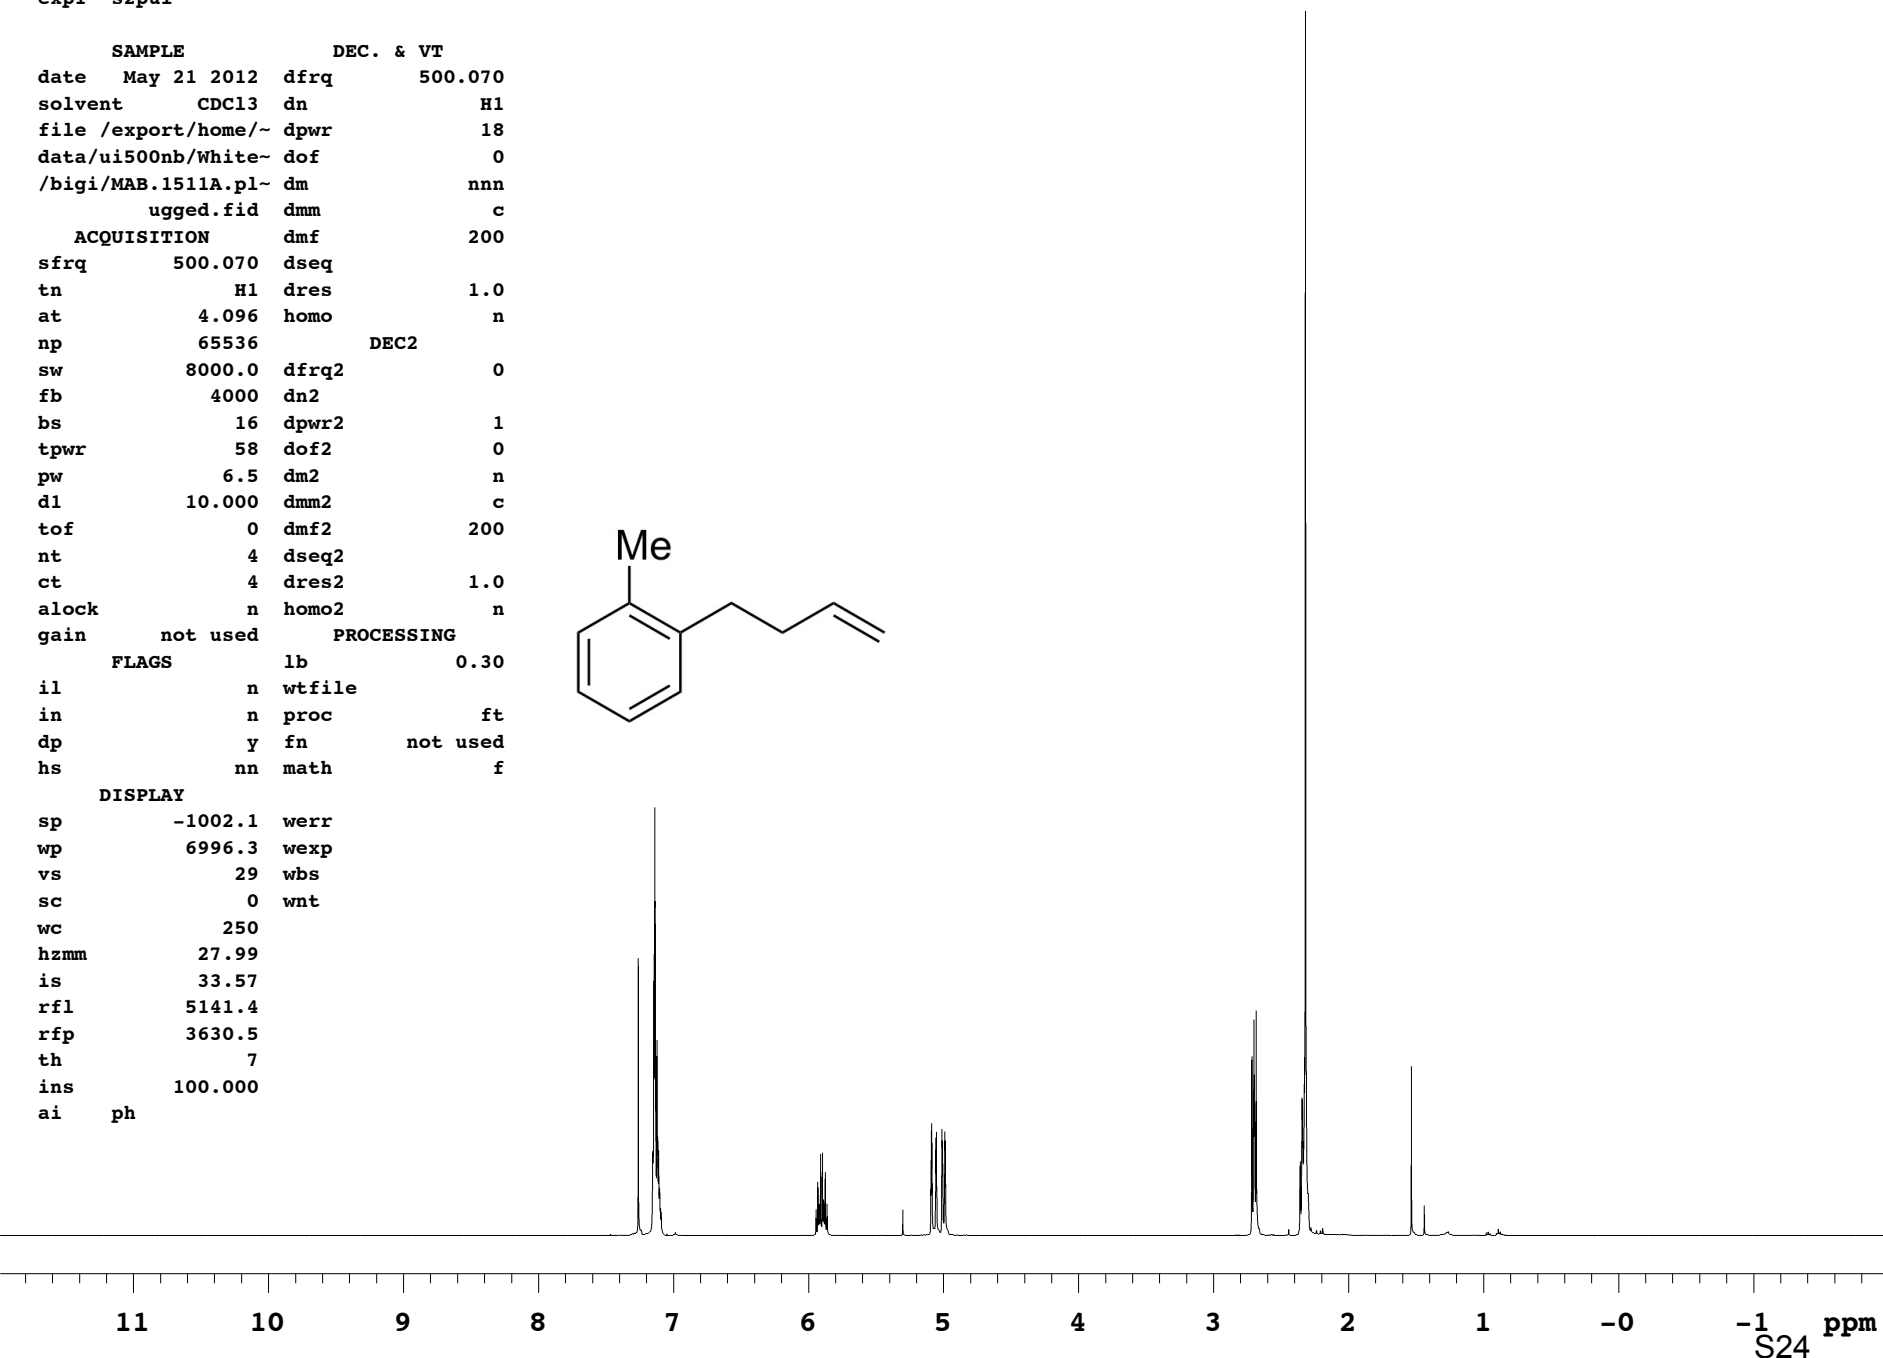

11 10 9 8 7 6 5 4 3 2 1 -0 -1 ppm



expl s2pul

| SAMPLE      |             | DEC. & VT  |         |
|-------------|-------------|------------|---------|
| date        | Feb 13 2013 | dfrq       | 499.692 |
| solvent     | CDC13       | dn         | H1      |
| file        | exp         | dpwr       | 45      |
| ACQUISITION |             | dof        |         |
| sfrq        | 125.661     | dm         | YYY     |
| tn          | C13         | dmm        | w       |
| at          | 1.086       | dmf        | 20202   |
| np          | 65536       | dseq       |         |
| sw          | 30165.9     | dres       | 90.0    |
| fb          | 17000       | homo       | n       |
| bs          | 16          | DEC2       |         |
| ss          | 1           | dfrq2      | 0       |
| tpwr        | 60          | dn2        |         |
| pw          | 6.0         | dpwr2      | 1       |
| d1          | 1.000       | dof2       | 0       |
| tof         | 1884.7      | dm2        | n       |
| nt          | 1200        | dmm2       | c       |
| ct          | 130         | dmf2       | 10000   |
| alock       | n           | dseq2      |         |
| gain        | not used    | dres2      | 1.0     |
| FLAGS       |             | homo2      |         |
| il          | n           | PROCESSING |         |
| in          | n           | lb         | 1.00    |
| dp          | y           | wtfile     |         |
| hs          | nn          | proc       | ft      |
| DISPLAY     |             | fn         |         |
| sp          | 10.3        | math       | f       |
| wp          | 27680.3     |            |         |
| vs          | 105         | werr       |         |
| sc          | 0           | wexp       |         |
| wc          | 250         | wbs        |         |
| hzmm        | 110.72      | wnt        |         |
| is          | 500.00      |            |         |
| rfl         | 10971.6     |            |         |
| rfp         | 9694.9      |            |         |
| th          | 18          |            |         |
| ins         | 100.000     |            |         |
| nm          | ph          |            |         |

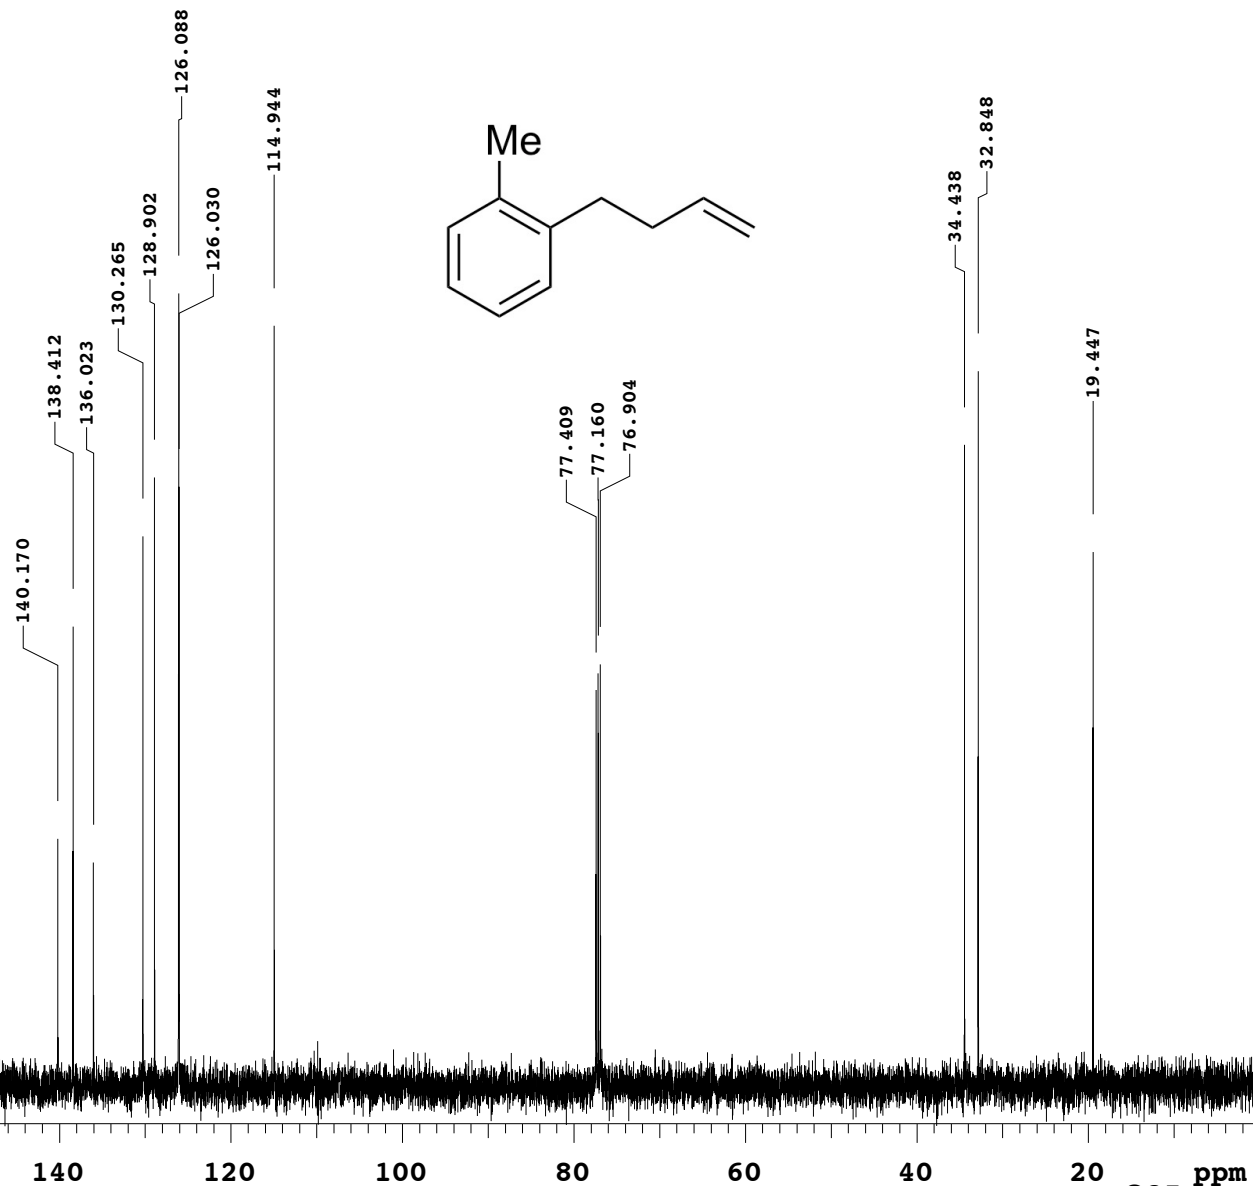

expl s2pul

| SAMPLE      |             | DEC. & VT  |          |
|-------------|-------------|------------|----------|
| date        | Feb 13 2013 | dfrq       | 500.070  |
| solvent     | CDC13       | dn         | H1       |
| file        | exp         | dpwr       | 18       |
| ACQUISITION |             | dof        |          |
| sfrq        | 500.070     | dm         | nnn      |
| tn          | H1          | dmm        | c        |
| at          | 4.096       | dmf        | 200      |
| np          | 65536       | dseq       |          |
| sw          | 8000.0      | dres       | 1.0      |
| fb          | 4000        | homo       | n        |
| bs          | 16          | DEC2       |          |
| tpwr        | 58          | dfrq2      | 0        |
| pw          | 6.5         | dn2        |          |
| d1          | 10.000      | dpwr2      | 1        |
| tof         | 0           | dof2       | 0        |
| nt          | 4           | dm2        | n        |
| ct          | 4           | dmm2       | c        |
| alock       | n           | dmf2       | 200      |
| gain        | not used    | dseq2      |          |
| FLAGS       |             | dres2      |          |
|             |             |            | 1.0      |
| il          | n           | homo2      | n        |
| in          | n           | PROCESSING |          |
| dp          | y           | lb         | 0.30     |
| hs          | nn          | wtfile     |          |
| DISPLAY     |             | proc       |          |
| sp          | -995.5      | fn         | not used |
| wp          | 6980.7      | math       | f        |
| vs          | 21          |            |          |
| sc          | 0           | werr       |          |
| wc          | 250         | wexp       |          |
| hzmm        | 27.92       | wbs        |          |
| is          | 33.57       | wnt        |          |
| rfl         | 1510.9      |            |          |
| rfp         | 0           |            |          |
| th          | 7           |            |          |
| ins         | 100.000     |            |          |
| ai          | ph          |            |          |

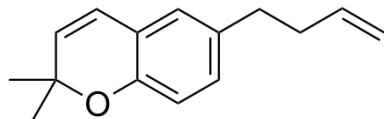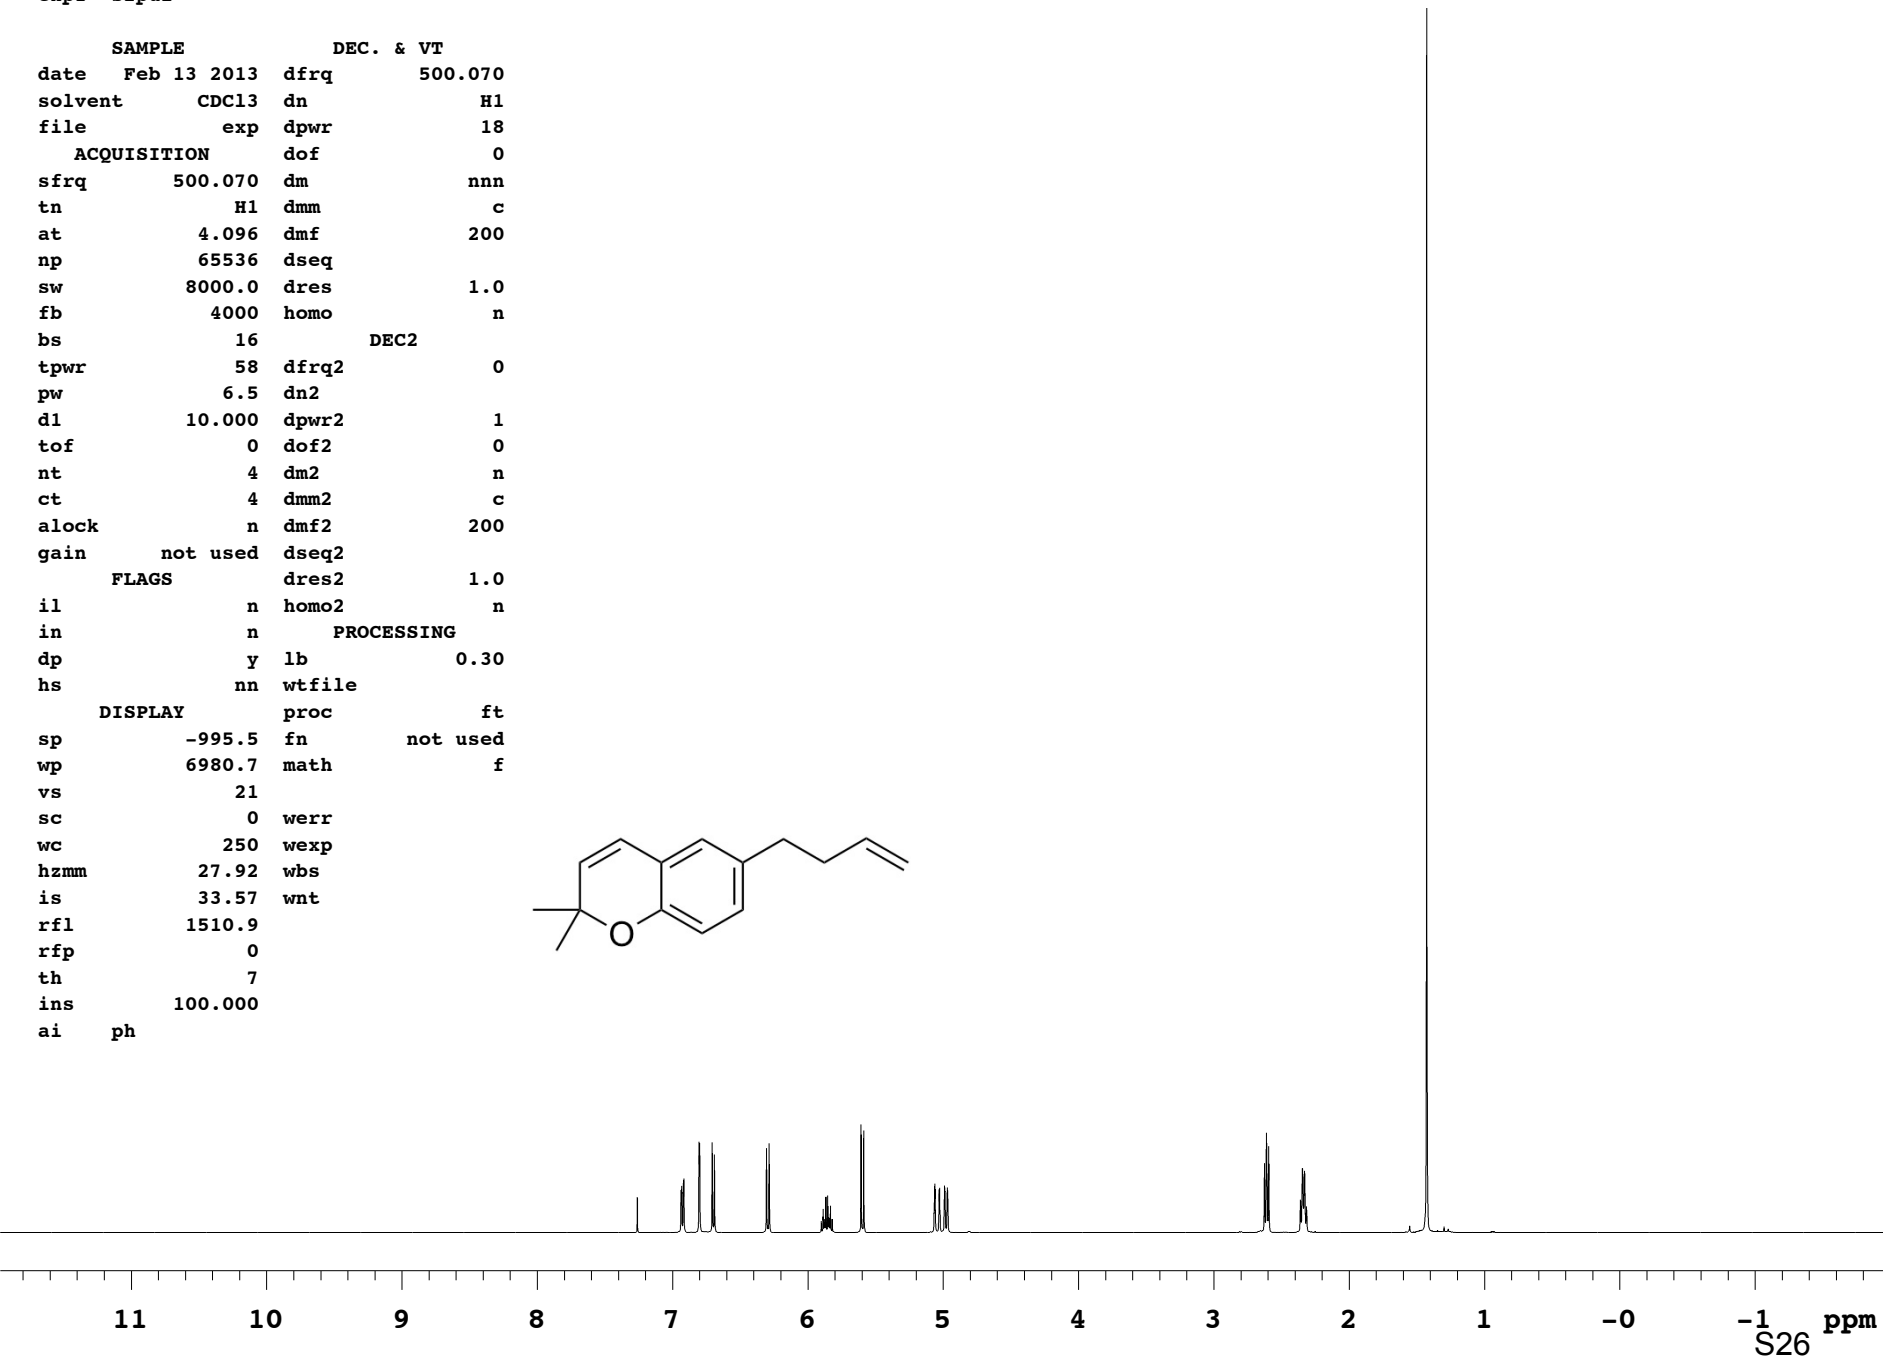

expl s2pul

| SAMPLE      |             | DEC. & VT  |          |
|-------------|-------------|------------|----------|
| date        | Feb 13 2013 | dfrq       | 499.692  |
| solvent     | CDC13       | dn         | H1       |
| file        | exp         | dpwr       | 45       |
| ACQUISITION |             | dof        | -827.6   |
| sfrq        | 125.661     | dm         | YYY      |
| tn          | C13         | dmm        | w        |
| at          | 1.086       | dmf        | 20202    |
| np          | 65536       | dseq       |          |
| sw          | 30165.9     | dres       | 90.0     |
| fb          | 17000       | homo       | n        |
| bs          | 16          | DEC2       |          |
| ss          | 1           | dfrq2      | 0        |
| tpwr        | 60          | dn2        |          |
| pw          | 6.0         | dpwr2      | 1        |
| d1          | 1.000       | dof2       | 0        |
| tof         | 1884.7      | dm2        | n        |
| nt          | 1200        | dmm2       | c        |
| ct          | 125         | dmf2       | 10000    |
| alock       | n           | dseq2      |          |
| gain        | not used    | dres2      | 1.0      |
| FLAGS       |             | homo2      | n        |
| il          | n           | PROCESSING |          |
| in          | n           | lb         | 1.00     |
| dp          | y           | wtfile     |          |
| hs          | nn          | proc       | ft       |
| DISPLAY     |             | fn         | not used |
| sp          | -31.1       | math       | f        |
| wp          | 27502.6     |            |          |
| vs          | 162         | werr       |          |
| sc          | 0           | wexp       |          |
| wc          | 250         | wbs        |          |
| hzmm        | 110.01      | wnt        |          |
| is          | 500.00      |            |          |
| rfl         | 10968.8     |            |          |
| rfp         | 9694.9      |            |          |
| th          | 16          |            |          |
| ins         | 100.000     |            |          |
| nm          | ph          |            |          |

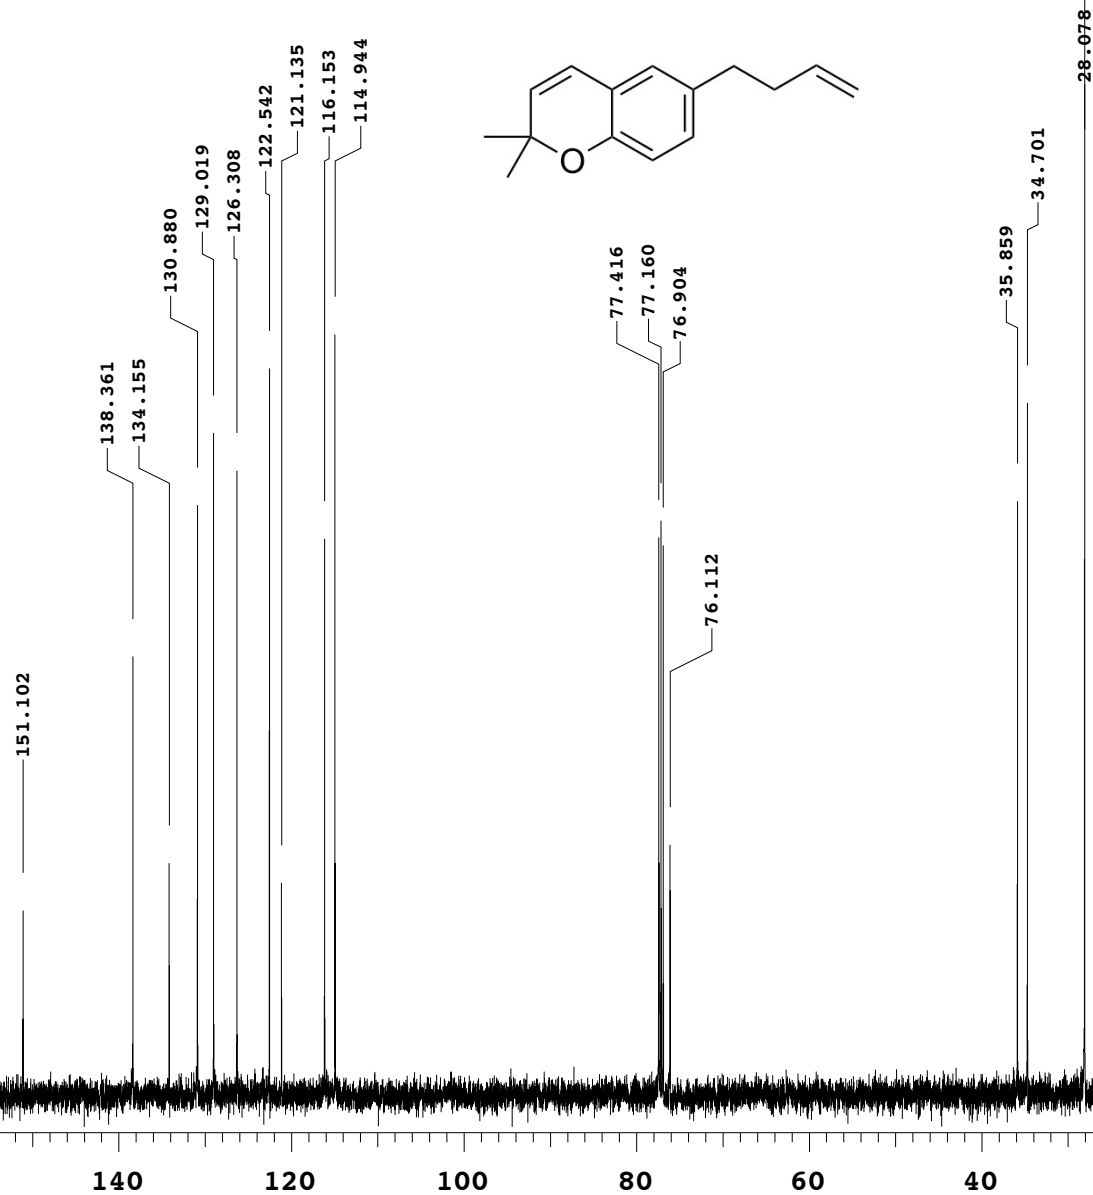

200 180 160 140 120 100 80 60 40 20 ppm

expl s2pul

| SAMPLE      |             | DEC. & VT  |          |
|-------------|-------------|------------|----------|
| date        | Feb 13 2013 | dfrq       | 500.070  |
| solvent     | CDC13       | dn         | H1       |
| file        | exp         | dpwr       | 18       |
| ACQUISITION |             | dof        | 0        |
| sfrq        | 500.070     | dm         | nnn      |
| tn          | H1          | dmm        | c        |
| at          | 4.096       | dmf        | 200      |
| np          | 65536       | dseq       |          |
| sw          | 8000.0      | dres       | 1.0      |
| fb          | 4000        | homo       | n        |
| bs          | 16          | DEC2       |          |
| tpwr        | 58          | dfrq2      | 0        |
| pw          | 6.5         | dn2        |          |
| d1          | 10.000      | dpwr2      | 1        |
| tof         | 0           | dof2       | 0        |
| nt          | 4           | dm2        | n        |
| ct          | 4           | dmm2       | c        |
| alock       | n           | dmf2       | 200      |
| gain        | not used    | dseq2      |          |
| FLAGS       |             | dres2      | 1.0      |
| il          | n           | homo2      | n        |
| in          | n           | PROCESSING |          |
| dp          | y           | lb         | 0.30     |
| hs          | nn          | wtfile     |          |
| DISPLAY     |             | proc       | ft       |
| sp          | -995.0      | fn         | not used |
| wp          | 6992.4      | math       | f        |
| vs          | 62          |            |          |
| sc          | 0           | werr       |          |
| wc          | 250         | wexp       |          |
| hzmm        | 27.97       | wbs        |          |
| is          | 33.57       | wnt        |          |
| rfl         | 5140.9      |            |          |
| rfp         | 3630.5      |            |          |
| th          | 7           |            |          |
| ins         | 100.000     |            |          |
| ai          | ph          |            |          |

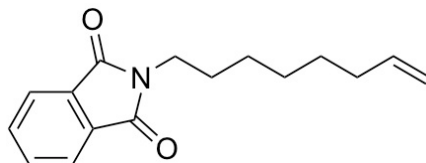

11 10 9 8 7 6 5 4 3 2 1 -0 -1 ppm

expl s2pul

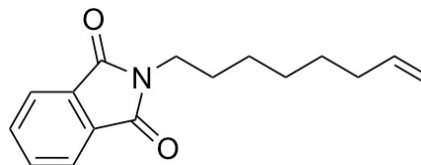

| SAMPLE      |             | DEC. & VT  |         |
|-------------|-------------|------------|---------|
| date        | Feb 13 2013 | dfrq       | 499.432 |
| solvent     | CDC13       | dn         | H1      |
| file        | exp         | dpwr       | 47      |
| ACQUISITION |             | dof        |         |
| sfrq        | 125.596     | dm         | YYY     |
| tn          | C13         | dmm        | w       |
| at          | 1.024       | dmf        | 15873   |
| np          | 65536       | dseq       |         |
| sw          | 32000.0     | dres       | 1.0     |
| fb          | 18000       | homo       | n       |
| bs          | 16          | DEC2       |         |
| ss          | 1           | dfrq2      | 0       |
| tpwr        | 63          | dn2        |         |
| pw          | 4.5         | dpwr2      | 1       |
| d1          | 1.000       | dof2       | 0       |
| tof         | 1880.0      | dm2        | n       |
| nt          | 1200        | dmm2       | c       |
| ct          | 196         | dmf2       | 18519   |
| alock       | n           | dseq2      |         |
| gain        | not used    | dres2      | 1.0     |
| FLAGS       |             | homo2      |         |
| il          | n           | PROCESSING |         |
| in          | n           | lb         | 1.00    |
| dp          | y           | wtfile     |         |
| hs          | nn          | proc       | ft      |
| DISPLAY     |             | fn         |         |
| sp          | -46.4       | math       | f       |
| wp          | 27641.6     |            |         |
| vs          | 162         | werr       |         |
| sc          | 0           | wexp       |         |
| wc          | 250         | wbs        |         |
| hzmm        | 110.57      | wnt        |         |
| is          | 500.00      |            |         |
| rfl         | 11891.6     |            |         |
| rfp         | 9689.9      |            |         |
| th          | 19          |            |         |
| ins         | 100.000     |            |         |
| nm          | ph          |            |         |

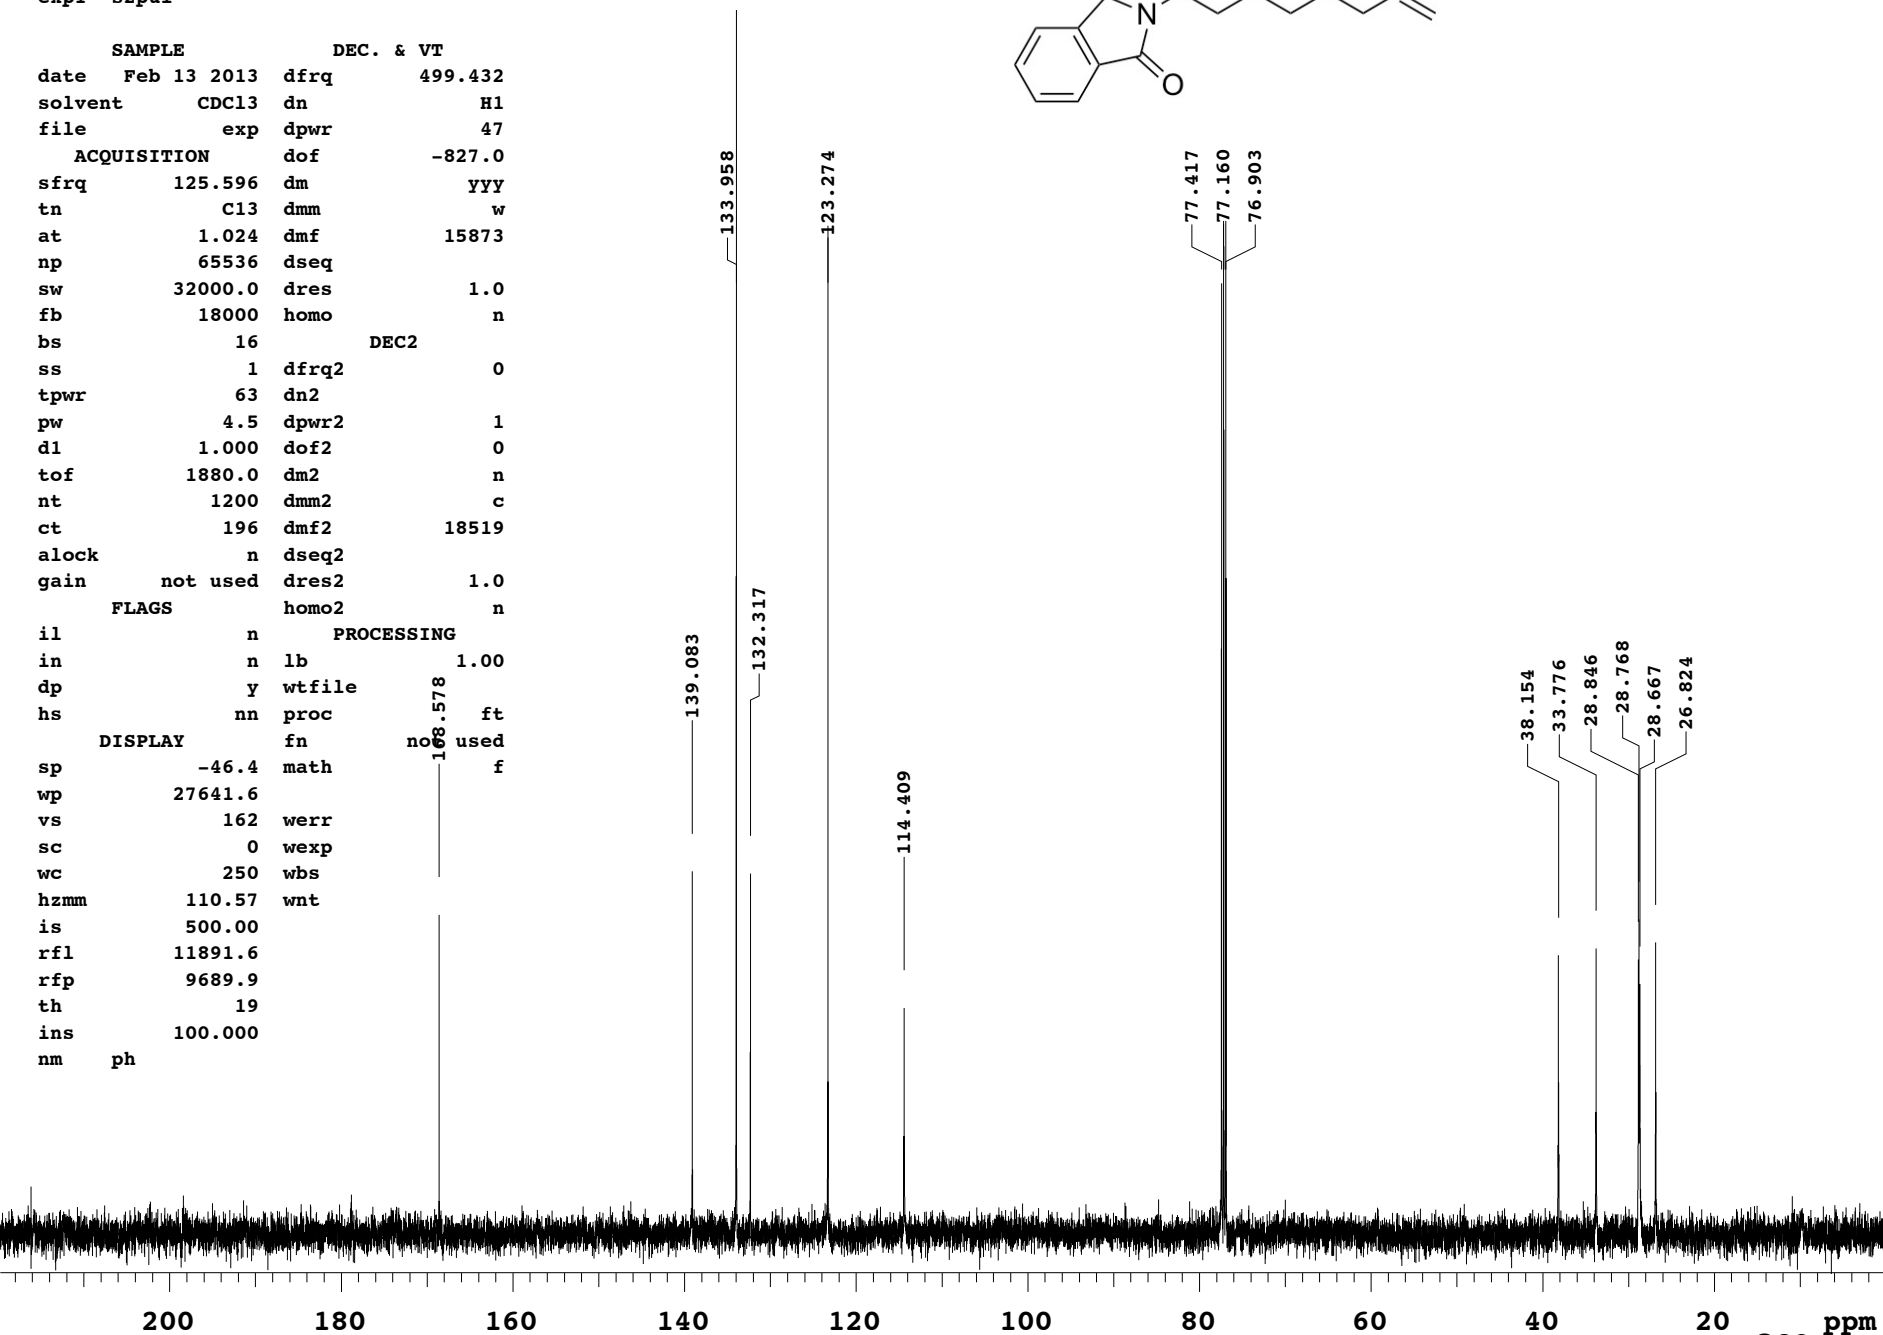

expl s2pul

| SAMPLE      |             | DEC. & VT  |          |
|-------------|-------------|------------|----------|
| date        | Feb 14 2013 | dfrq       | 500.070  |
| solvent     | CDC13       | dn         | H1       |
| file        | exp         | dpwr       | 18       |
| ACQUISITION |             | dof        | 0        |
| sfrq        | 500.070     | dm         | nnn      |
| tn          | H1          | dmm        | c        |
| at          | 4.096       | dmf        | 200      |
| np          | 65536       | dseq       |          |
| sw          | 8000.0      | dres       | 1.0      |
| fb          | 4000        | homo       | n        |
| bs          | 16          | DEC2       |          |
| tpwr        | 58          | dfrq2      | 0        |
| pw          | 6.5         | dn2        |          |
| d1          | 10.000      | dpwr2      | 1        |
| tof         | 0           | dof2       | 0        |
| nt          | 4           | dm2        | n        |
| ct          | 4           | dmm2       | c        |
| alock       | n           | dmf2       | 200      |
| gain        | not used    | dseq2      |          |
| FLAGS       |             | dres2      | 1.0      |
| il          | n           | homo2      | n        |
| in          | n           | PROCESSING |          |
| dp          | y           | lb         | 0.30     |
| hs          | nn          | wtfile     |          |
| DISPLAY     |             | proc       | ft       |
| sp          | -995.2      | fn         | not used |
| wp          | 7004.2      | math       | f        |
| vs          | 80          |            |          |
| sc          | 0           | werr       |          |
| wc          | 250         | wexp       |          |
| hzmm        | 28.02       | wbs        |          |
| is          | 33.57       | wnt        |          |
| rfl         | 5141.1      |            |          |
| rfp         | 3630.5      |            |          |
| th          | 7           |            |          |
| ins         | 100.000     |            |          |
| ai          | ph          |            |          |

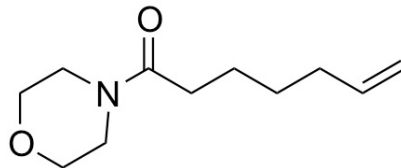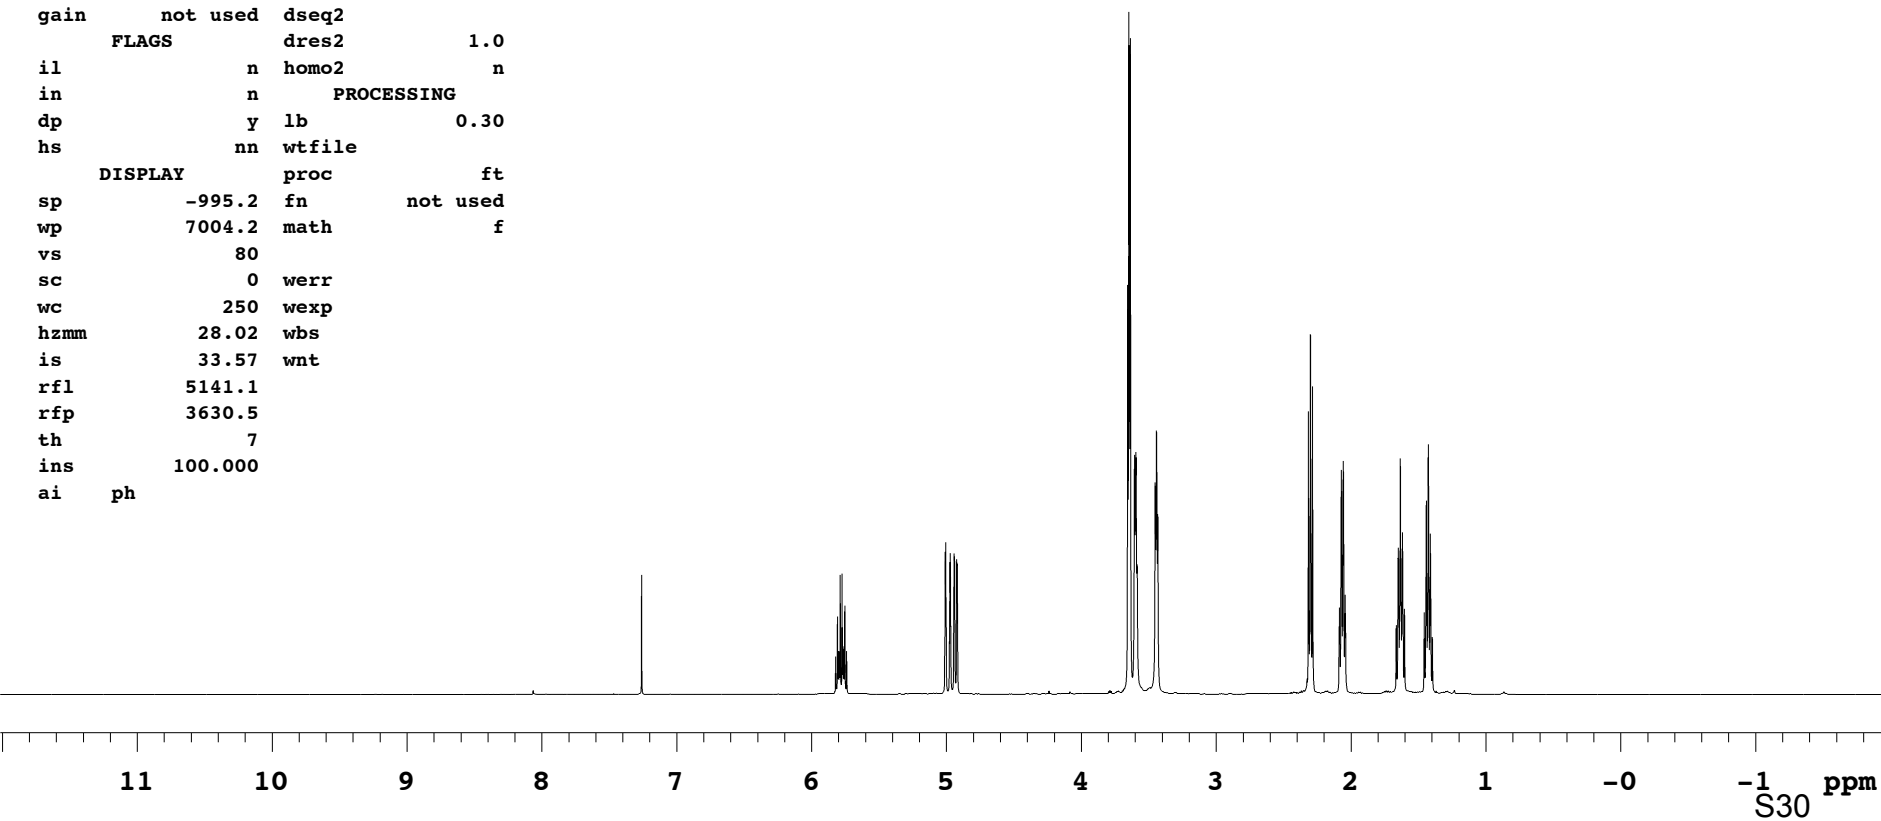

expl s2pul

| SAMPLE      |             | DEC. & VT  |         |
|-------------|-------------|------------|---------|
| date        | Feb 14 2013 | dfrq       | 499.692 |
| solvent     | CDC13       | dn         | H1      |
| file        | exp         | dpwr       | 45      |
| ACQUISITION |             | dof        |         |
| sfrq        | 125.661     | dm         | YYY     |
| tn          | C13         | dmm        | w       |
| at          | 1.086       | dmf        | 20202   |
| np          | 65536       | dseq       |         |
| sw          | 30165.9     | dres       | 90.0    |
| fb          | 17000       | homo       | n       |
| bs          | 16          | DEC2       |         |
| ss          | 1           | dfrq2      | 0       |
| tpwr        | 60          | dn2        |         |
| pw          | 6.0         | dpwr2      | 1       |
| d1          | 1.000       | dof2       | 0       |
| tof         | 1884.7      | dm2        | n       |
| nt          | 1200        | dmm2       | c       |
| ct          | 130         | dmf2       | 10000   |
| alock       | n           | dseq2      |         |
| gain        | not used    | dres2      | 1.0     |
| FLAGS       |             | homo2      |         |
| il          | n           | PROCESSING |         |
| in          | n           | lb         | 1.00    |
| dp          | y           | wtfile     |         |
| hs          | nn          | proc       | ft      |
| DISPLAY     |             | fn         |         |
| sp          | 10.3        | math       | f       |
| wp          | 27636.1     |            |         |
| vs          | 162         | werr       |         |
| sc          | 0           | wexp       |         |
| wc          | 250         | wbs        |         |
| hzmm        | 110.54      | wnt        |         |
| is          | 500.00      |            |         |
| rfl         | 10971.6     |            |         |
| rfp         | 9694.9      |            |         |
| th          | 30          |            |         |
| ins         | 100.000     |            |         |
| nm          | ph          |            |         |

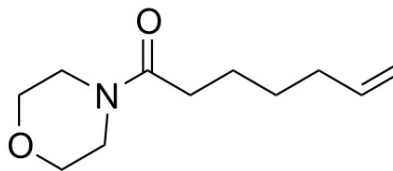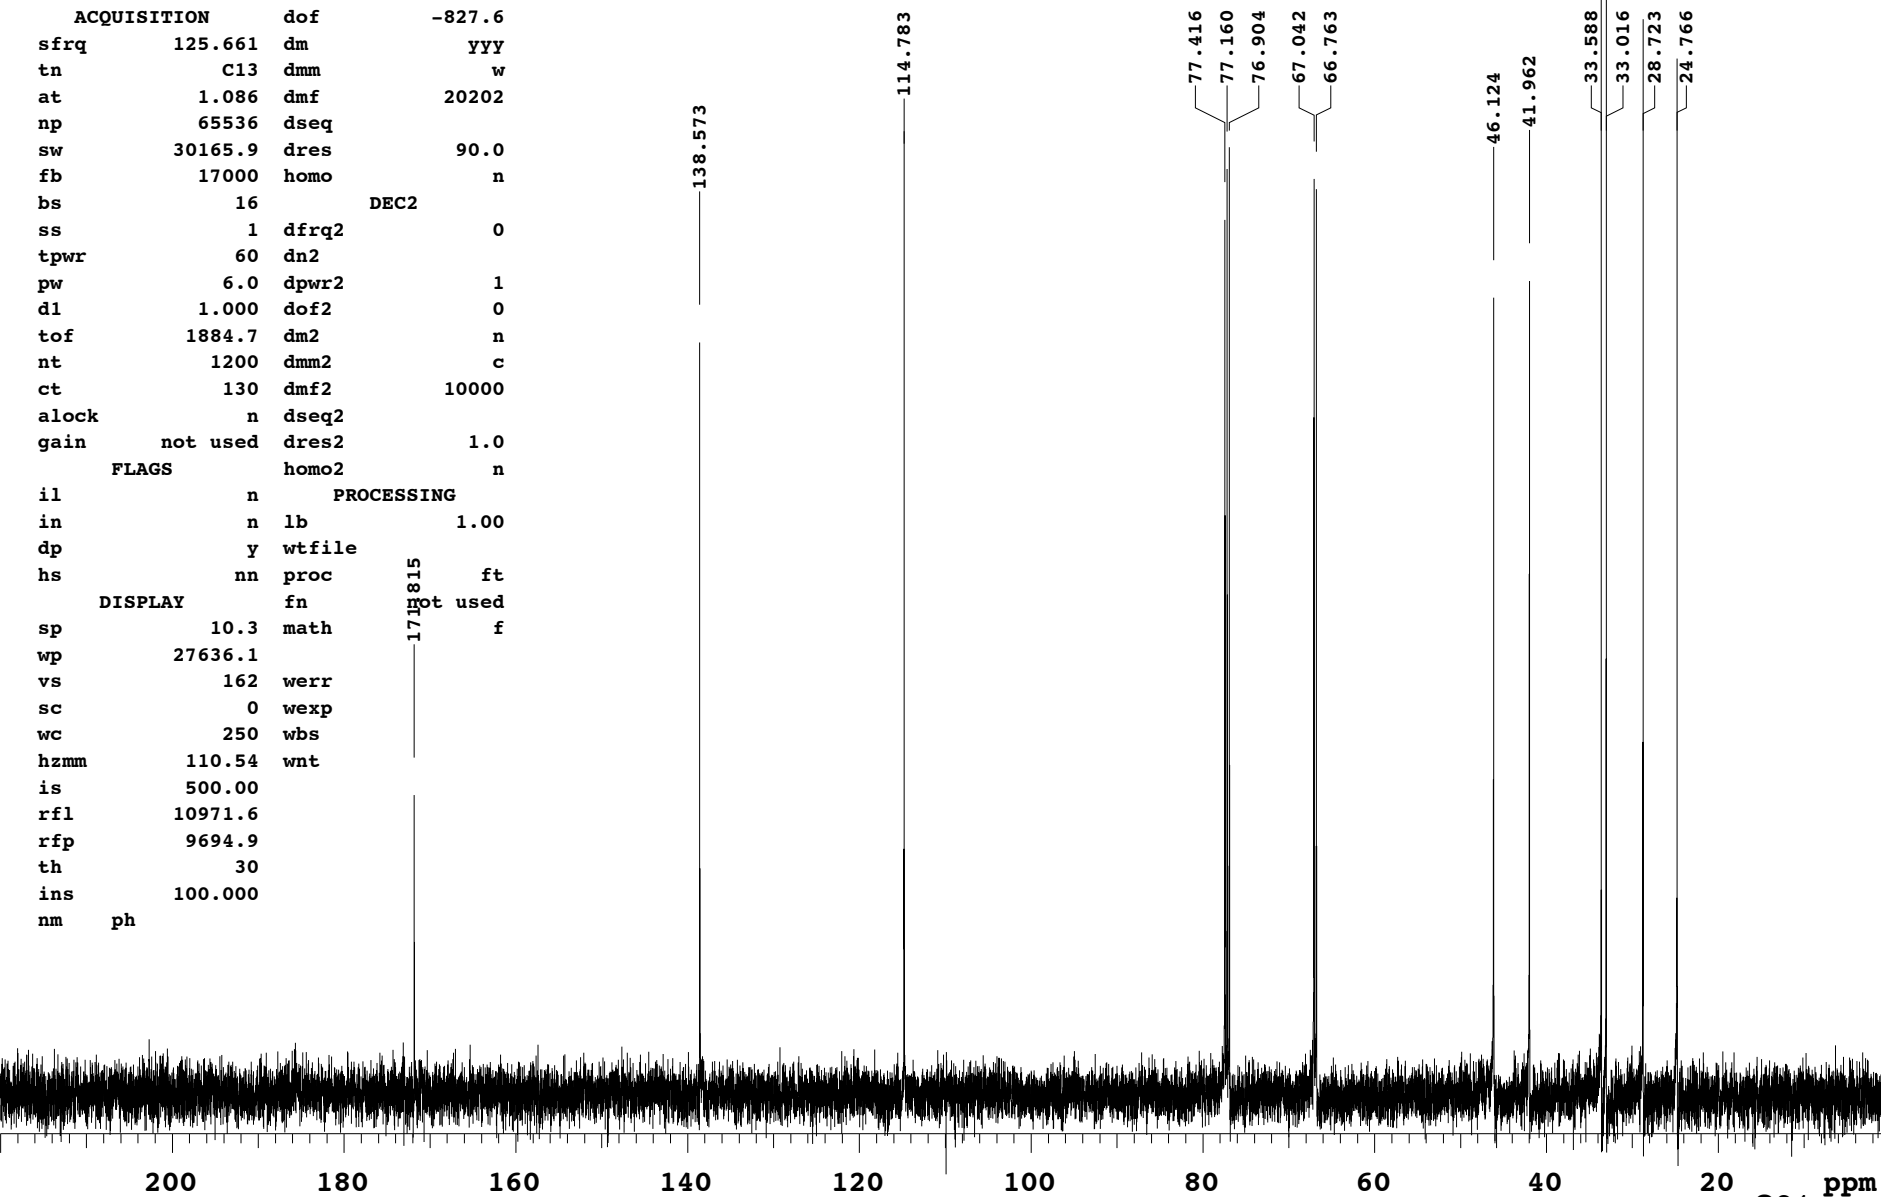

expl s2pul

| SAMPLE              |                | DEC. & VT  |          |
|---------------------|----------------|------------|----------|
| date                | Jun 18 2012    | dfrq       | 500.070  |
| solvent             | CDC13          | dn         | H1       |
| file                | /export/home/~ | dpwr       | 18       |
| data/ui500nb/White~ | dof            |            | 0        |
| /bigi/MAB.1539A.co~ | dm             |            | nnn      |
| lunned.fid          | dmm            |            | c        |
| ACQUISITION         |                |            |          |
| sfrq                | 500.070        | dseq       |          |
| tn                  | H1             | dres       | 1.0      |
| at                  | 4.096          | homo       | n        |
| np                  | 65536          | DEC2       |          |
| sw                  | 8000.0         | dfrq2      | 0        |
| fb                  | 4000           | dn2        |          |
| bs                  | 16             | dpwr2      | 1        |
| tpwr                | 58             | dof2       | 0        |
| pw                  | 6.5            | dm2        | n        |
| d1                  | 10.000         | dmm2       | c        |
| tof                 | 0              | dmf2       | 200      |
| nt                  | 4              | dseq2      |          |
| ct                  | 4              | dres2      | 1.0      |
| alock               | n              | homo2      | n        |
| gain                | not used       | PROCESSING |          |
| FLAGS               | lb             |            | 0.30     |
| il                  | n              | wtfile     |          |
| in                  | n              | proc       | ft       |
| dp                  | y              | fn         | not used |
| hs                  | nn             | math       | f        |
| DISPLAY             |                |            |          |
| sp                  | -995.2         | werr       |          |
| wp                  | 6980.7         | wexp       |          |
| vs                  | 52             | wbs        |          |
| sc                  | 0              | wnt        |          |
| wc                  | 250            |            |          |
| hzmm                | 27.92          |            |          |
| is                  | 33.57          |            |          |
| rfl                 | 5141.1         |            |          |
| rfp                 | 3630.5         |            |          |
| th                  | 7              |            |          |
| ins                 | 100.000        |            |          |
| ai                  | ph             |            |          |

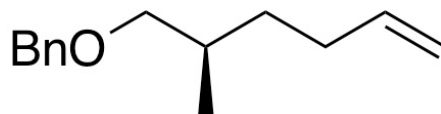

11 10 9 8 7 6 5 4 3 2 1 -0 -1 ppm



expl s2pul

| SAMPLE      |             | DEC. & VT |          |
|-------------|-------------|-----------|----------|
| date        | Feb 18 2013 | dfrq      | 499.692  |
| solvent     | CDC13       | dn        | H1       |
| file        | exp         | dpwr      | 45       |
| ACQUISITION |             | dof       | -827.6   |
| sfrq        | 125.661     | dm        | YYY      |
| tn          | C13         | dmm       | w        |
| at          | 1.086       | dmf       | 20202    |
| np          | 65536       | dseq      |          |
| sw          | 30165.9     | dres      | 90.0     |
| fb          | 17000       | homo      | n        |
| bs          | 16          | DEC2      |          |
| ss          | 1           | dfrq2     | 0        |
| tpwr        | 60          | dn2       |          |
| pw          | 6.0         | dpwr2     | 1        |
| d1          | 1.000       | dof2      | 0        |
| tof         | 1884.7      | dm2       | n        |
| nt          | 1200        | dmm2      | c        |
| ct          | 65          | dmf2      | 10000    |
| alock       | n           | dseq2     |          |
| gain        | not used    | dres2     | 1.0      |
| FLAGS       |             | homo2     | n        |
| PROCESSING  |             |           |          |
| il          | n           | lb        | 1.00     |
| in          | n           | wtfile    |          |
| dp          | y           | proc      | ft       |
| hs          | nn          | fn        | not used |
| DISPLAY     |             | math      | f        |
| sp          | 46.2        | werr      |          |
| wp          | 27558.8     | wexp      |          |
| vs          | 78          | wbs       |          |
| sc          | 0           | wnt       |          |
| wc          | 250         |           |          |
| hzmm        | 110.24      |           |          |
| is          | 500.00      |           |          |
| rfl         | 10974.4     |           |          |
| rfp         | 9694.9      |           |          |
| th          | 6           |           |          |
| ins         | 100.000     |           |          |
| nm          | ph          |           |          |

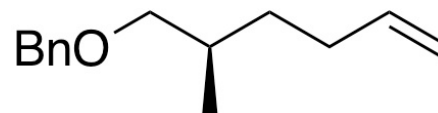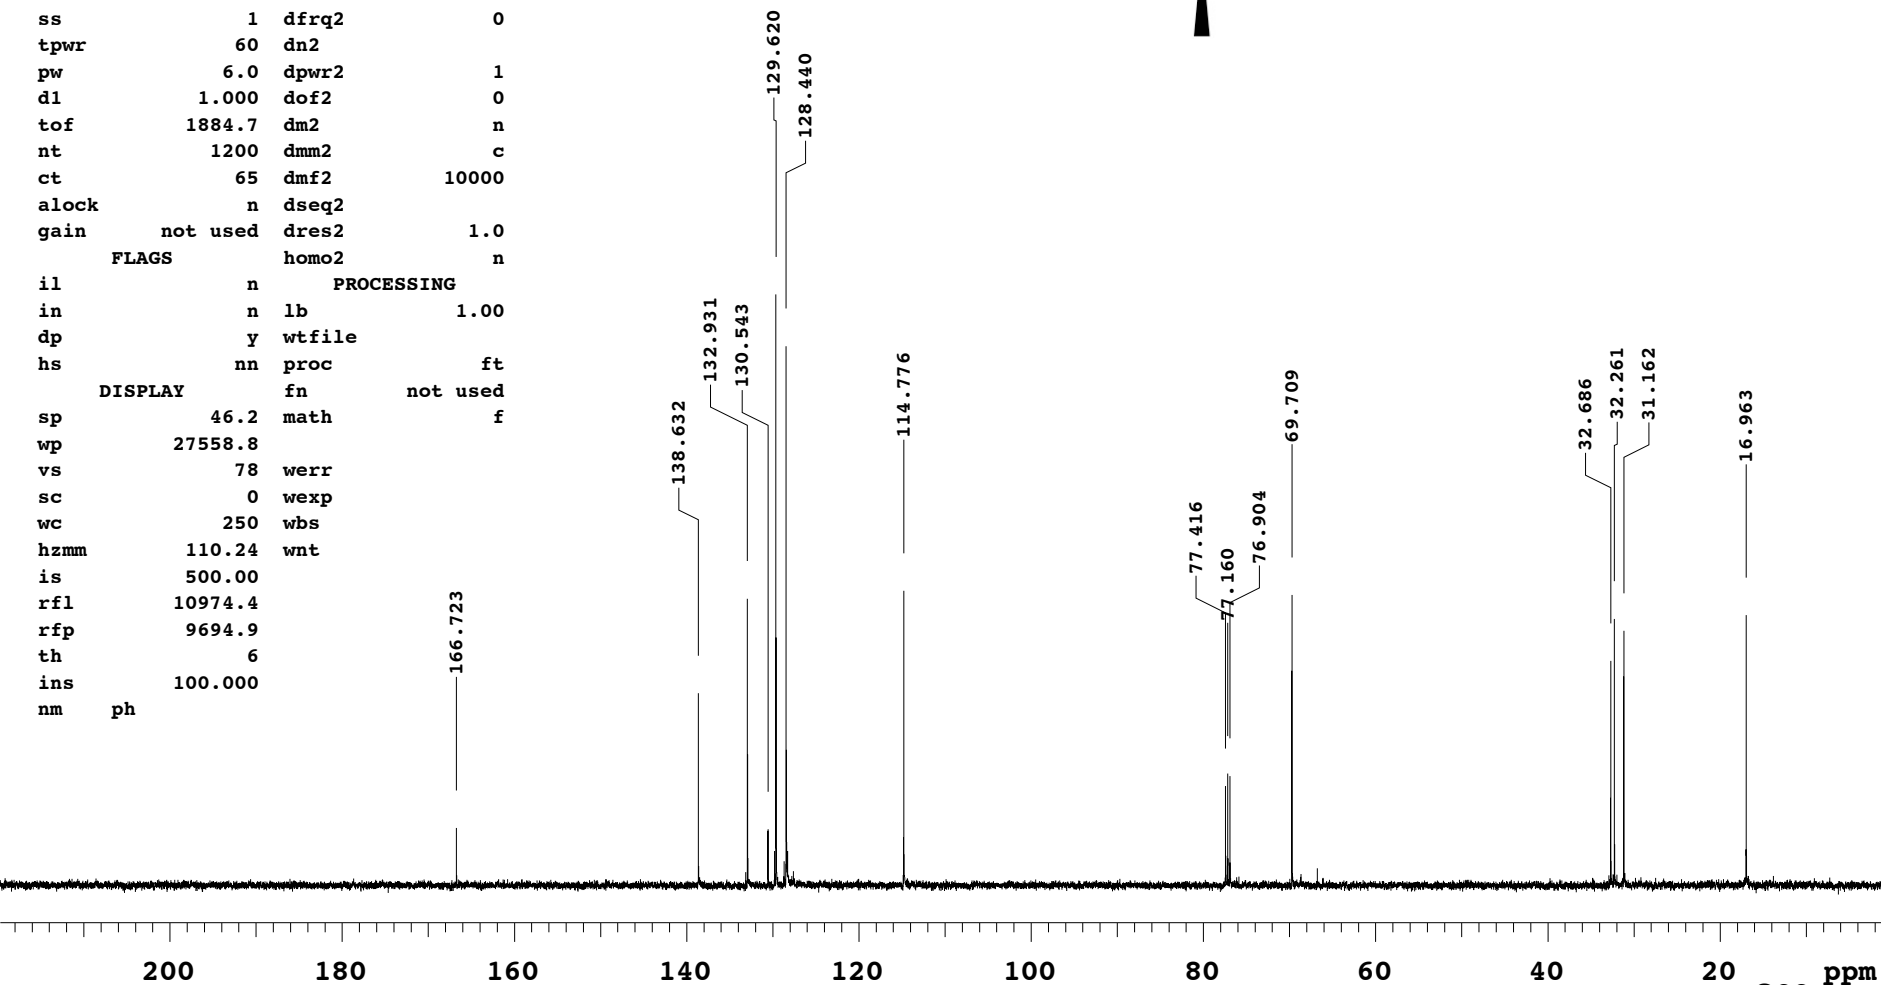

expl s2pul

| SAMPLE      |             | DEC. & VT  |          |
|-------------|-------------|------------|----------|
| date        | Feb 19 2013 | dfrq       | 499.432  |
| solvent     | CDC13       | dn         | H1       |
| file        | exp         | dpwr       | 25       |
| ACQUISITION |             | dof        | 0        |
| sfrq        | 499.432     | dm         | nnn      |
| tn          | H1          | dmm        | c        |
| at          | 4.096       | dmf        | 200      |
| np          | 65536       | dseq       |          |
| sw          | 8000.0      | dres       | 1.0      |
| fb          | 4000        | homo       | n        |
| bs          | 4           | DEC2       |          |
| tpwr        | 63          | dfrq2      | 0        |
| pw          | 8.0         | dn2        |          |
| d1          | 10.000      | dpwr2      | 1        |
| tof         | 0           | dof2       | 0        |
| nt          | 8           | dm2        | n        |
| ct          | 8           | dmm2       | c        |
| alock       | n           | dmf2       | 200      |
| gain        | not used    | dseq2      |          |
| FLAGS       |             | dres2      | 1.0      |
| il          | n           | homo2      | n        |
| in          | n           | PROCESSING |          |
| dp          | y           | lb         | 0.30     |
| hs          | nn          | wtfile     |          |
| DISPLAY     |             | proc       | ft       |
| sp          | -1016.5     | fn         | not used |
| wp          | 7004.2      | math       | f        |
| vs          | 162         |            |          |
| sc          | 0           | werr       |          |
| wc          | 250         | wexp       |          |
| hzmm        | 28.02       | wbs        |          |
| is          | 33.57       | wnt        |          |
| rfl         | 5134.3      |            |          |
| rfp         | 3625.9      |            |          |
| th          | 7           |            |          |
| ins         | 100.000     |            |          |
| nm          | ph          |            |          |

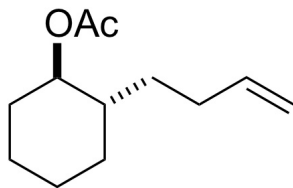

11 10 9 8 7 6 5 4 3 2 1 -0 -1 ppm

expl s2pul

| SAMPLE      |             | DEC. & VT  |         |
|-------------|-------------|------------|---------|
| date        | Feb 19 2013 | dfrq       | 499.432 |
| solvent     | CDC13       | dn         | H1      |
| file        | exp         | dpwr       | 47      |
| ACQUISITION |             | dof        |         |
| sfrq        | 125.596     | dm         | YYY     |
| tn          | C13         | dmm        | w       |
| at          | 1.024       | dmf        | 15873   |
| np          | 65536       | dseq       |         |
| sw          | 32000.0     | dres       | 1.0     |
| fb          | 18000       | homo       | n       |
| bs          | 16          | DEC2       |         |
| ss          | 1           | dfrq2      | 0       |
| tpwr        | 63          | dn2        |         |
| pw          | 4.5         | dpwr2      | 1       |
| d1          | 1.000       | dof2       | 0       |
| tof         | 1880.0      | dm2        | n       |
| nt          | 12000       | dmm2       | c       |
| ct          | 193         | dmf2       | 18519   |
| alock       | n           | dseq2      |         |
| gain        | not used    | dres2      | 1.0     |
| FLAGS       |             | homo2      |         |
| il          | n           | PROCESSING |         |
| in          | n           | lb         | 0.30    |
| dp          | y           | wtfile     |         |
| hs          | nn          | proc       | ft      |
| DISPLAY     |             | fn         |         |
| sp          | 0.4         | math       | f       |
| wp          | 27688.5     |            |         |
| vs          | 162         | werr       |         |
| sc          | 0           | wexp       |         |
| wc          | 250         | wbs        |         |
| hzmm        | 110.75      | wnt        |         |
| is          | 33.57       |            |         |
| rfl         | 11891.6     |            |         |
| rfp         | 9689.9      |            |         |
| th          | 27          |            |         |
| ins         | 100.000     |            |         |
| nm          | ph          |            |         |

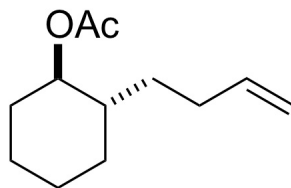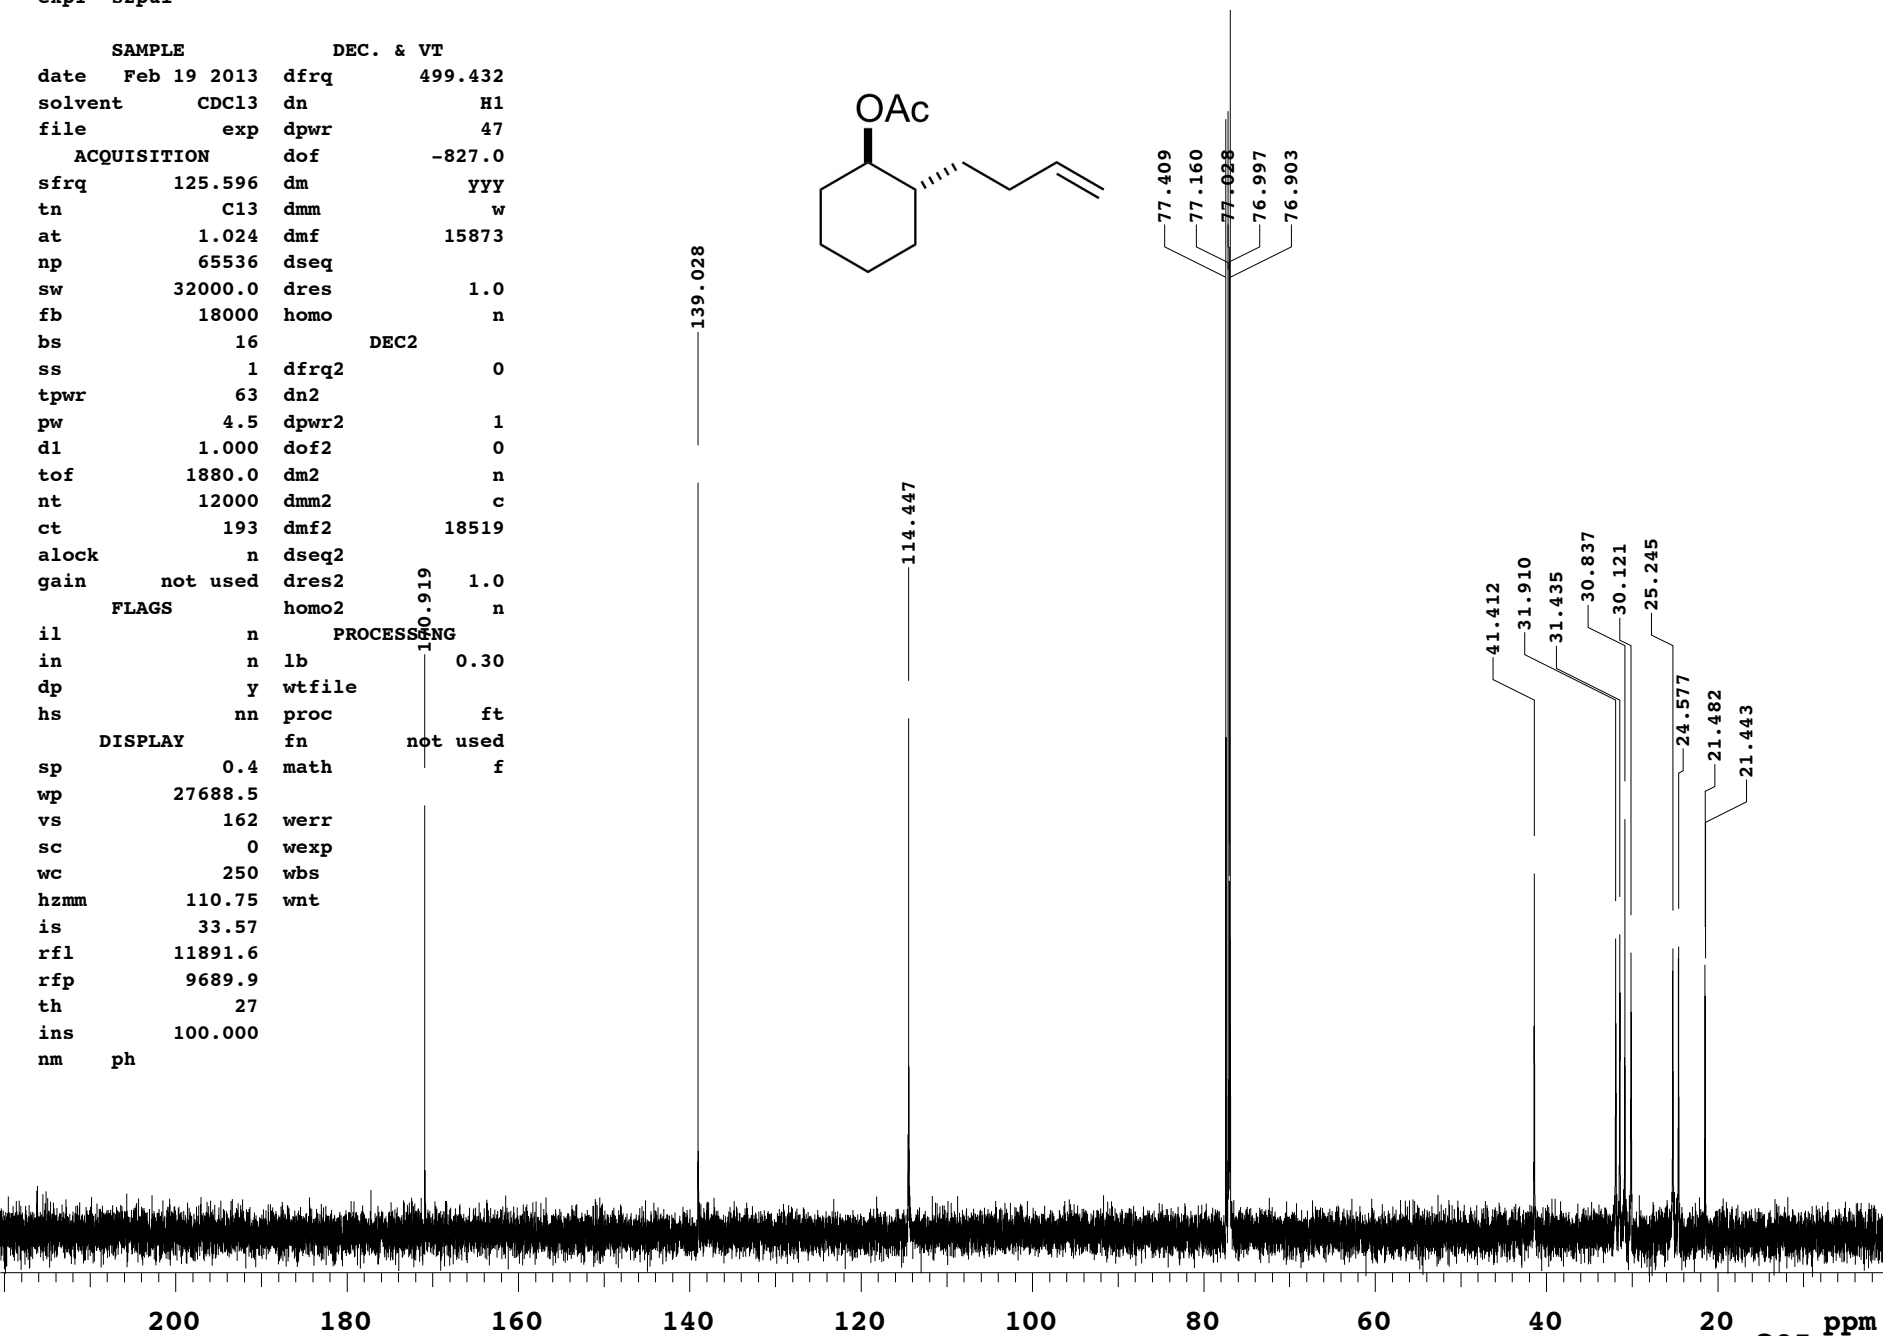

expl s2pul

| SAMPLE      |             | DEC. & VT  |          |
|-------------|-------------|------------|----------|
| date        | Feb 20 2013 | dfrq       | 499.432  |
| solvent     | CDC13       | dn         | H1       |
| file        | exp         | dpwr       | 25       |
| ACQUISITION |             | dof        | 0        |
| sfrq        | 499.432     | dm         | nnn      |
| tn          | H1          | dmm        | c        |
| at          | 4.096       | dmf        | 200      |
| np          | 65536       | dseq       |          |
| sw          | 8000.0      | dres       | 1.0      |
| fb          | 4000        | homo       | n        |
| bs          | 4           | DEC2       |          |
| tpwr        | 63          | dfrq2      | 0        |
| pw          | 8.0         | dn2        |          |
| d1          | 10.000      | dpwr2      | 1        |
| tof         | 0           | dof2       | 0        |
| nt          | 4           | dm2        | n        |
| ct          | 4           | dmm2       | c        |
| alock       | n           | dmf2       | 200      |
| gain        | not used    | dseq2      |          |
| FLAGS       |             | dres2      | 1.0      |
| il          | n           | homo2      | n        |
| in          | n           | PROCESSING |          |
| dp          | y           | lb         | 0.30     |
| hs          | nn          | wtfile     |          |
| DISPLAY     |             | proc       | ft       |
| sp          | -980.3      | fn         | not used |
| wp          | 6967.5      | math       | f        |
| vs          | 73          |            |          |
| sc          | 0           | werr       |          |
| wc          | 250         | wexp       |          |
| hzmm        | 27.87       | wbs        |          |
| is          | 33.57       | wnt        |          |
| rfl         | 5134.3      |            |          |
| rfp         | 3625.9      |            |          |
| th          | 7           |            |          |
| ins         | 100.000     |            |          |
| nm          | ph          |            |          |

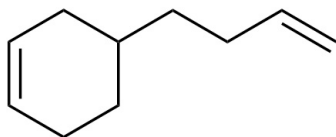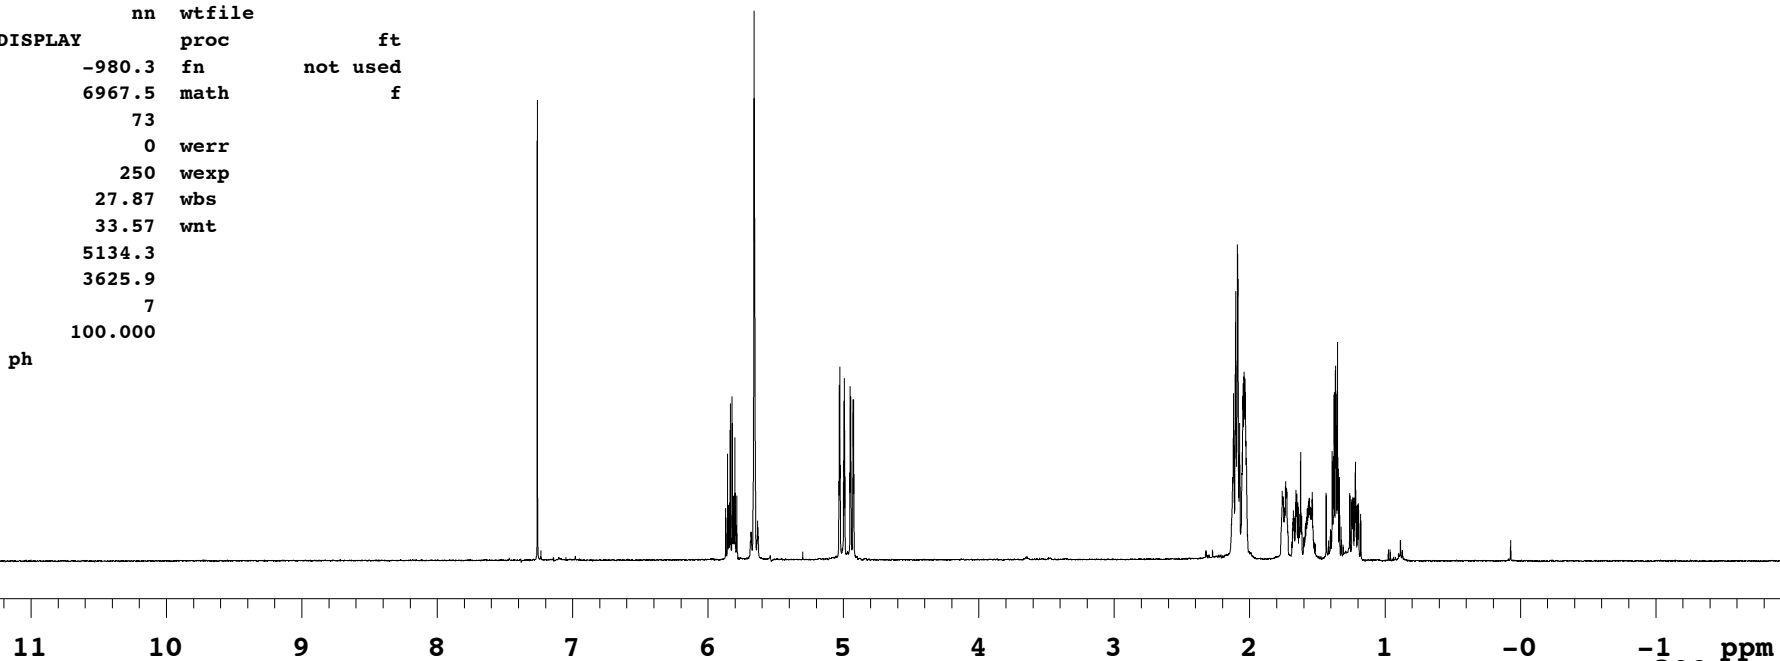

expl s2pul

| SAMPLE      |             | DEC. & VT  |         |
|-------------|-------------|------------|---------|
| date        | Feb 20 2013 | dfrq       | 499.432 |
| solvent     | CDC13       | dn         | H1      |
| file        | exp         | dpwr       | 47      |
| ACQUISITION |             | dof        |         |
| sfrq        | 125.596     | dm         | YYY     |
| tn          | C13         | dmm        | w       |
| at          | 1.024       | dmf        | 15873   |
| np          | 65536       | dseq       |         |
| sw          | 32000.0     | dres       | 1.0     |
| fb          | 18000       | homo       | n       |
| bs          | 16          | DEC2       |         |
| ss          | 1           | dfrq2      | 0       |
| tpwr        | 63          | dn2        |         |
| pw          | 4.5         | dpwr2      | 1       |
| d1          | 1.000       | dof2       | 0       |
| tof         | 1880.0      | dm2        | n       |
| nt          | 1200        | dmm2       | c       |
| ct          | 131         | dmf2       | 18519   |
| alock       | n           | dseq2      |         |
| gain        | not used    | dres2      | 1.0     |
| FLAGS       |             | homo2      |         |
| il          | n           | PROCESSING |         |
| in          | n           | lb         | 1.00    |
| dp          | y           | wtfile     |         |
| hs          | nn          | proc       | ft      |
| DISPLAY     |             | fn         |         |
| sp          | -41.6       | math       | f       |
| wp          | 27681.6     |            |         |
| vs          | 162         | werr       |         |
| sc          | 0           | wexp       |         |
| wc          | 250         | wbs        |         |
| hzmm        | 110.73      | wnt        |         |
| is          | 500.00      |            |         |
| rfl         | 11890.6     |            |         |
| rfp         | 9689.9      |            |         |
| th          | 35          |            |         |
| ins         | 100.000     |            |         |
| nm          | ph          |            |         |

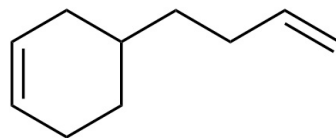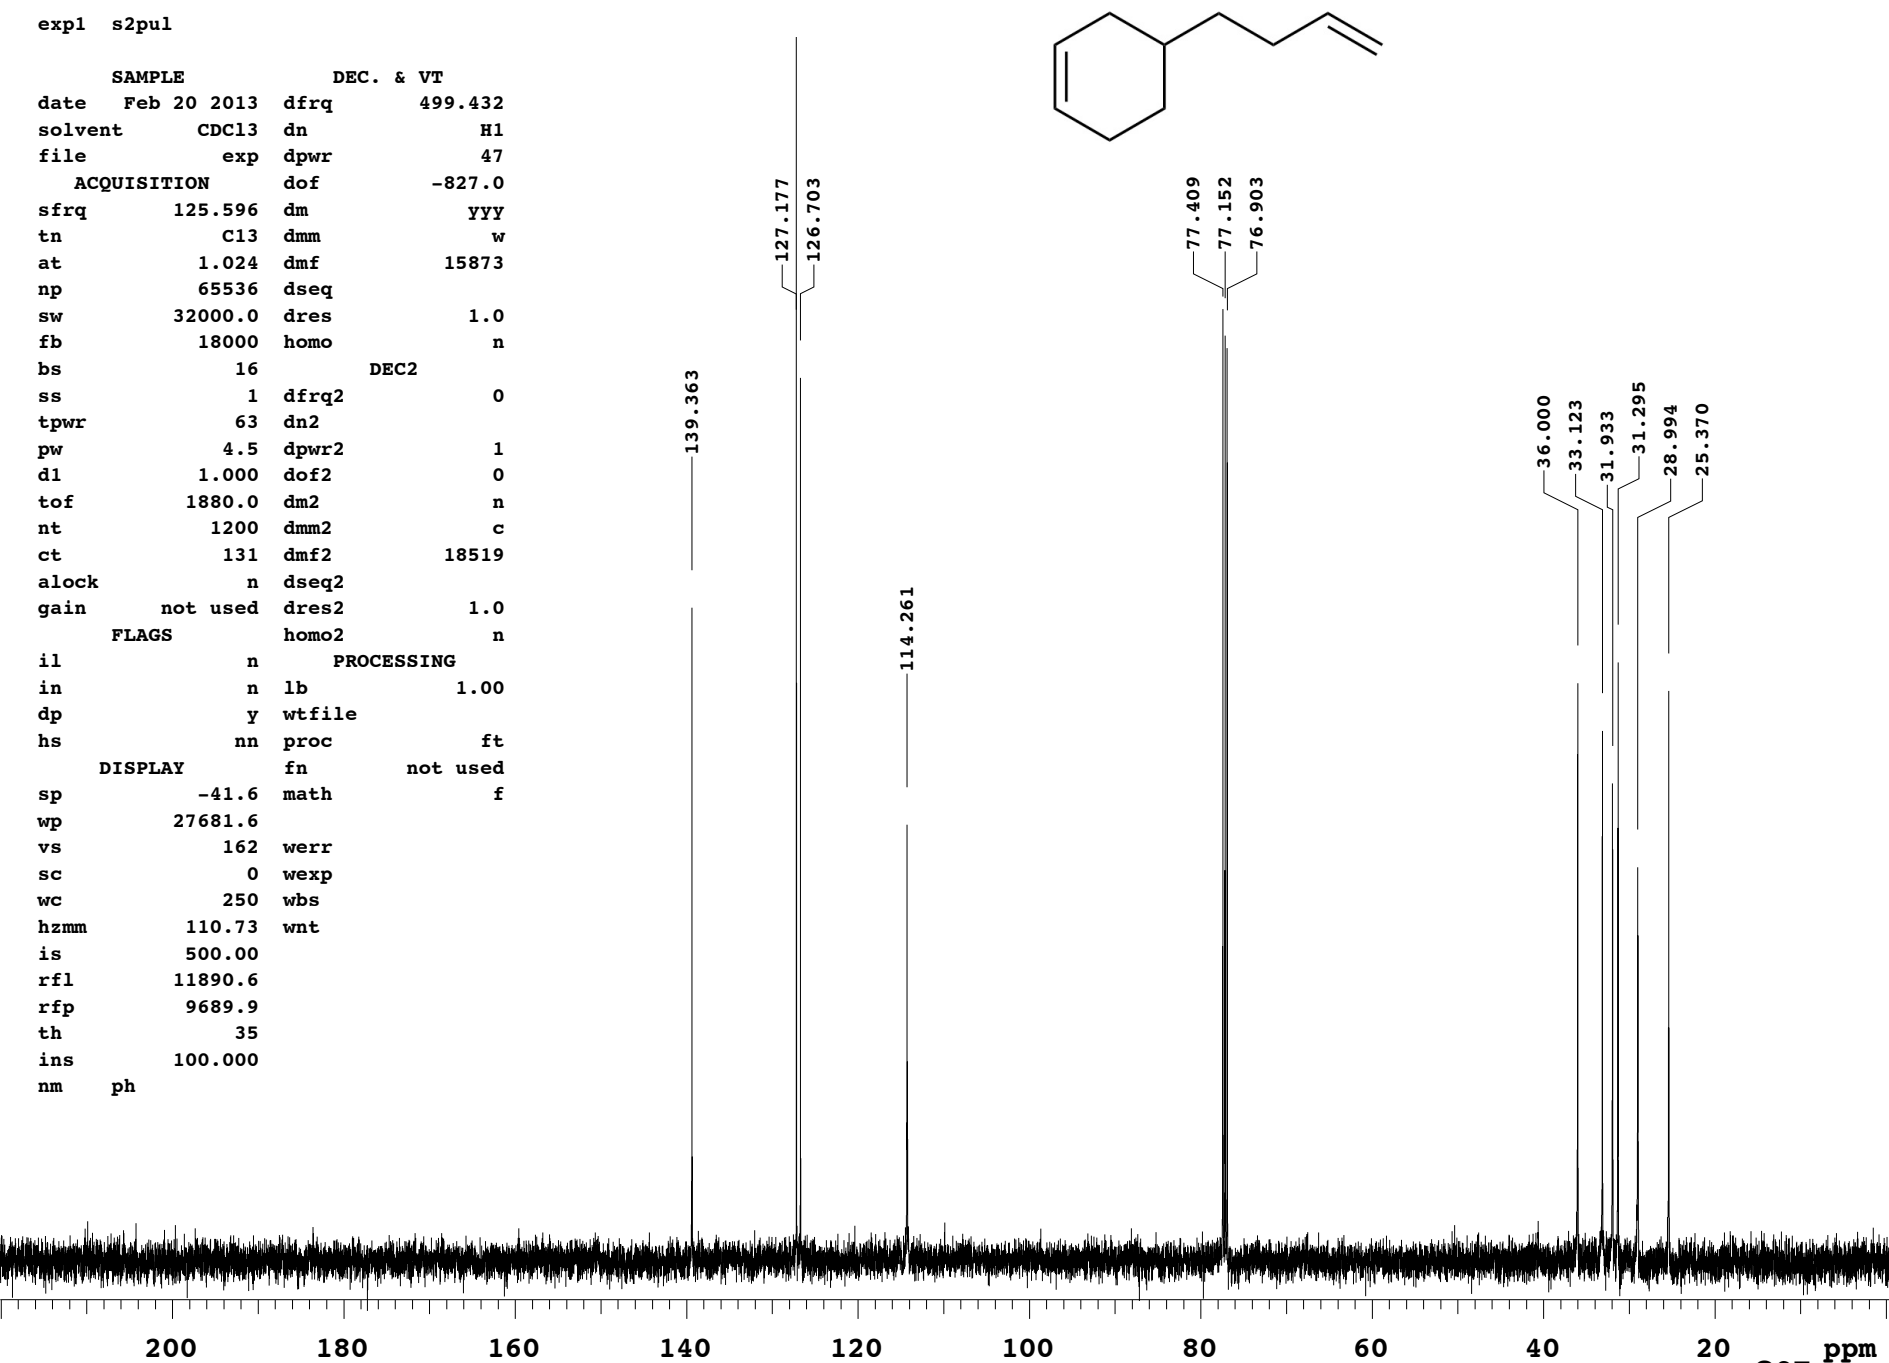

expl s2pul

| SAMPLE      |             | DEC. & VT  |          |
|-------------|-------------|------------|----------|
| date        | Feb 21 2013 | dfrq       | 499.432  |
| solvent     | CDC13       | dn         | H1       |
| file        | exp         | dpwr       | 25       |
| ACQUISITION |             | dof        | 0        |
| sfrq        | 499.432     | dm         | nnn      |
| tn          | H1          | dmm        | c        |
| at          | 4.096       | dmf        | 200      |
| np          | 65536       | dseq       |          |
| sw          | 8000.0      | dres       | 1.0      |
| fb          | 4000        | homo       | n        |
| bs          | 4           | DEC2       |          |
| tpwr        | 63          | dfrq2      | 0        |
| pw          | 8.0         | dn2        |          |
| d1          | 10.000      | dpwr2      | 1        |
| tof         | 0           | dof2       | 0        |
| nt          | 4           | dm2        | n        |
| ct          | 4           | dmm2       | c        |
| alock       | n           | dmf2       | 200      |
| gain        | not used    | dseq2      |          |
| FLAGS       |             | dres2      | 1.0      |
| il          | n           | homo2      | n        |
| in          | n           | PROCESSING |          |
| dp          | y           | lb         | 0.30     |
| hs          | nn          | wtfile     |          |
| DISPLAY     |             | proc       | ft       |
| sp          | -997.7      | fn         | not used |
| wp          | 7001.2      | math       | f        |
| vs          | 88          |            |          |
| sc          | 0           | werr       |          |
| wc          | 250         | wexp       |          |
| hzmm        | 28.00       | wbs        |          |
| is          | 33.57       | wnt        |          |
| rfl         | 5134.5      |            |          |
| rfp         | 3625.9      |            |          |
| th          | 7           |            |          |
| ins         | 100.000     |            |          |
| nm          | ph          |            |          |

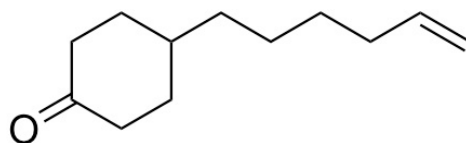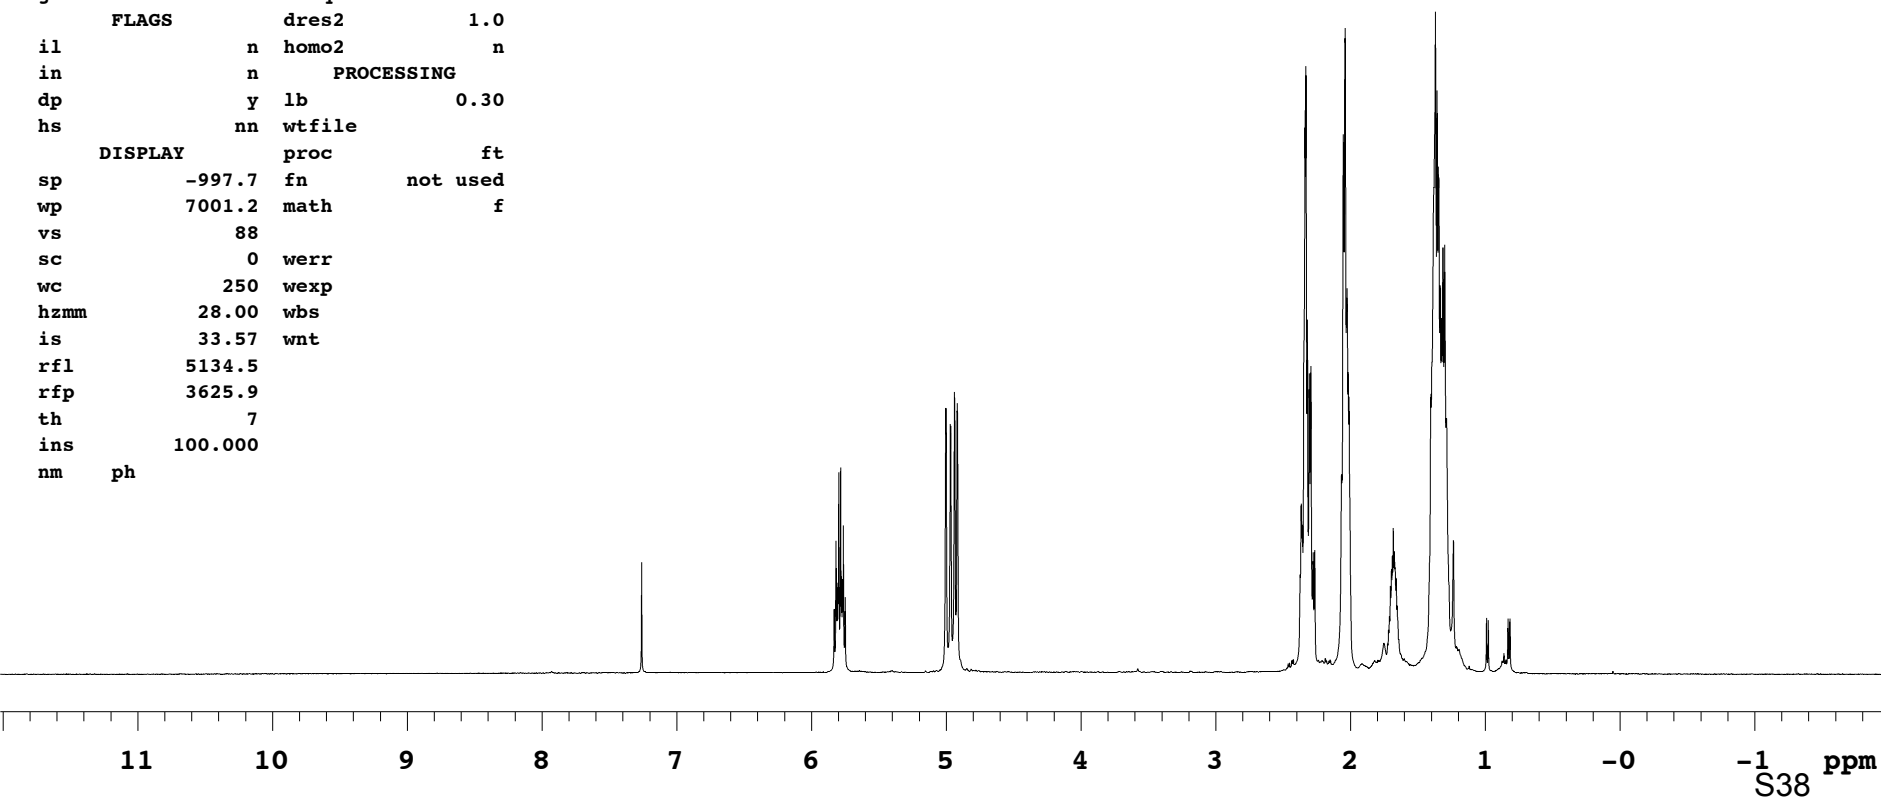

expl s2pul

| SAMPLE      |             | DEC. & VT  |         |
|-------------|-------------|------------|---------|
| date        | Feb 21 2013 | dfrq       | 499.432 |
| solvent     | CDC13       | dn         | H1      |
| file        | exp         | dpwr       | 47      |
| ACQUISITION |             | dof        |         |
| sfrq        | 125.596     | dm         | YYY     |
| tn          | C13         | dmm        | w       |
| at          | 1.024       | dmf        | 15873   |
| np          | 65536       | dseq       |         |
| sw          | 32000.0     | dres       | 1.0     |
| fb          | 18000       | homo       | n       |
| bs          | 16          | DEC2       |         |
| ss          | 1           | dfrq2      | 0       |
| tpwr        | 63          | dn2        |         |
| pw          | 4.5         | dpwr2      | 1       |
| d1          | 1.000       | dof2       | 0       |
| tof         | 1880.0      | dm2        | n       |
| nt          | 1200        | dmm2       | c       |
| ct          | 132         | dmf2       | 18519   |
| alock       | n           | dseq2      |         |
| gain        | not used    | dres2      | 1.0     |
| FLAGS       |             | homo2      |         |
| il          | n           | PROCESSING |         |
| in          | n           | lb         | 1.00    |
| dp          | y           | wtfile     |         |
| hs          | nn          | proc       | ft      |
| DISPLAY     |             | fn         |         |
| sp          | -112.8      | math       | f       |
| wp          | 27818.4     |            |         |
| vs          | 162         | werr       |         |
| sc          | 0           | wexp       |         |
| wc          | 250         | wbs        |         |
| hz          | 111.27      | wnt        |         |
| is          | 500.00      |            |         |
| rf          | 11893.6     |            |         |
| rfp         | 9689.9      |            |         |
| th          | 14          |            |         |
| ins         | 100.000     |            |         |
| nm          | ph          |            |         |

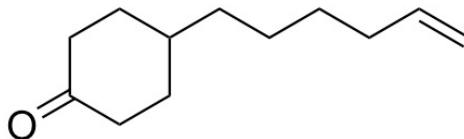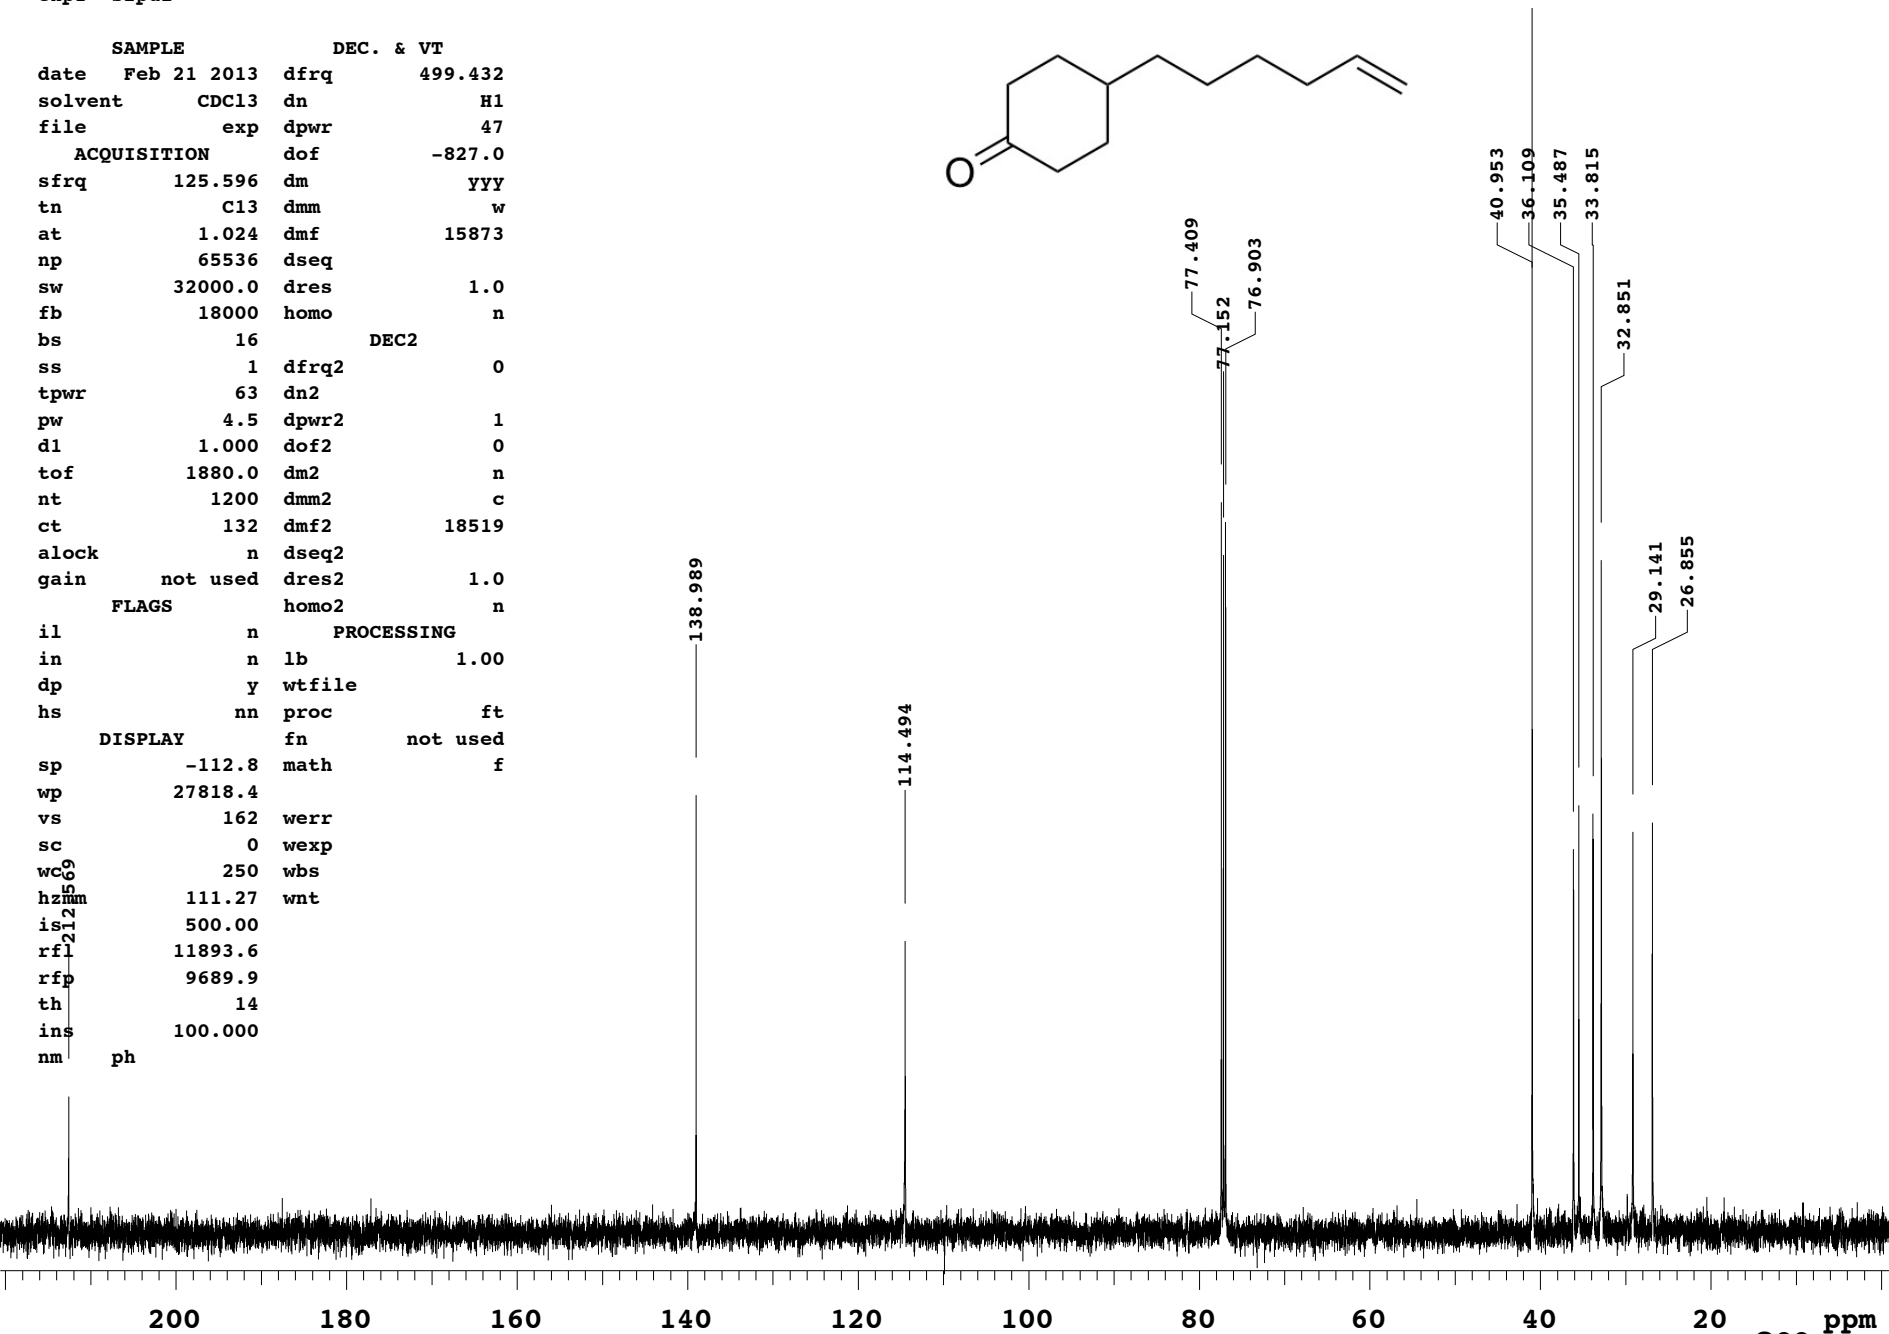

expl s2pul

| SAMPLE              |                | DEC. & VT |         |
|---------------------|----------------|-----------|---------|
| date                | May 24 2012    | dfrq      | 500.070 |
| solvent             | CDC13          | dn        | H1      |
| file                | /export/home/~ | dpwr      | 18      |
| data/White/big/MA~  |                | dof       | 0       |
| B.1498B.column1.fi~ |                | dm        | nnn     |
|                     |                | d         | dmm     |
|                     |                |           | c       |

| ACQUISITION |          |            |     |
|-------------|----------|------------|-----|
| sfrq        | 500.070  | dseq       |     |
| tn          | H1       | dres       | 1.0 |
| at          | 4.096    | homo       | n   |
| np          | 65536    | DEC2       |     |
| sw          | 8000.0   | dfrq2      | 0   |
| fb          | 4000     | dn2        |     |
| bs          | 16       | dpwr2      | 1   |
| tpwr        | 58       | dof2       | 0   |
| pw          | 6.5      | dm2        | n   |
| d1          | 0        | dmm2       | c   |
| tof         | 0        | dmf2       | 200 |
| nt          | 4        | dseq2      |     |
| ct          | 4        | dres2      | 1.0 |
| alock       | n        | homo2      | n   |
| gain        | not used | PROCESSING |     |

| FLAGS |    |        |          |
|-------|----|--------|----------|
| il    | n  | wtfile |          |
| in    | n  | proc   | ft       |
| dp    | y  | fn     | not used |
| hs    | nn | math   | f        |

| DISPLAY |         |      |  |
|---------|---------|------|--|
| sp      | -983.5  | werr |  |
| wp      | 6992.4  | wexp |  |
| vs      | 73      | wbs  |  |
| sc      | 0       | wnt  |  |
| wc      | 250     |      |  |
| hzmm    | 27.97   |      |  |
| is      | 33.57   |      |  |
| rfl     | 1510.6  |      |  |
| rfp     | 0       |      |  |
| th      | 7       |      |  |
| ins     | 100.000 |      |  |
| ai      | ph      |      |  |

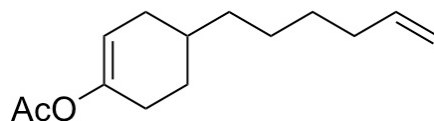

11 10 9 8 7 6 5 4 3 2 1 -0 -1 ppm

S40



expl s2pul

| SAMPLE      |             | DEC. & VT |            |
|-------------|-------------|-----------|------------|
| date        | Feb 23 2013 | dfrq      | 499.692    |
| solvent     | CDC13       | dn        | H1         |
| file        | exp         | dpwr      | 45         |
| ACQUISITION |             | dof       |            |
| sfrq        | 125.661     | dm        | YYY        |
| tn          | C13         | dmm       | w          |
| at          | 1.086       | dmf       | 20202      |
| np          | 65536       | dseq      |            |
| sw          | 30165.9     | dres      | 90.0       |
| fb          | 17000       | homo      | n          |
| bs          | 16          |           | DEC2       |
| ss          | 1           | dfrq2     | 0          |
| tpwr        | 60          | dn2       |            |
| pw          | 6.0         | dpwr2     | 1          |
| d1          | 1.000       | dof2      | 0          |
| tof         | 1884.7      | dm2       | n          |
| nt          | 1200        | dmm2      | c          |
| ct          | 194         | dmf2      | 10000      |
| alock       | n           | dseq2     |            |
| gain        | not used    | dres2     | 1.0        |
| FLAGS       |             | homo2     |            |
| il          | n           |           | PROCESSING |
| in          | n           | lb        | 1.00       |
| dp          | y           | wtfile    |            |
| hs          | nn          | proc      | ft         |
| DISPLAY     |             | fn        |            |
| sp          | 50.8        | math      | f          |
| wp          | 27562.5     |           |            |
| vs          | 105         | werr      |            |
| sc          | 0           | wexp      |            |
| wc          | 250         | wbs       |            |
| hzmm        | 110.25      | wnt       |            |
| is          | 500.00      |           |            |
| rfl         | 10967.9     |           |            |
| rfp         | 9694.9      |           |            |
| th          | 15          |           |            |
| ins         | 100.000     |           |            |
| nm          | ph          |           |            |

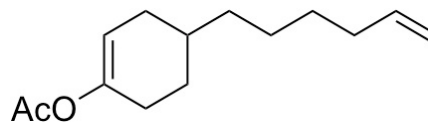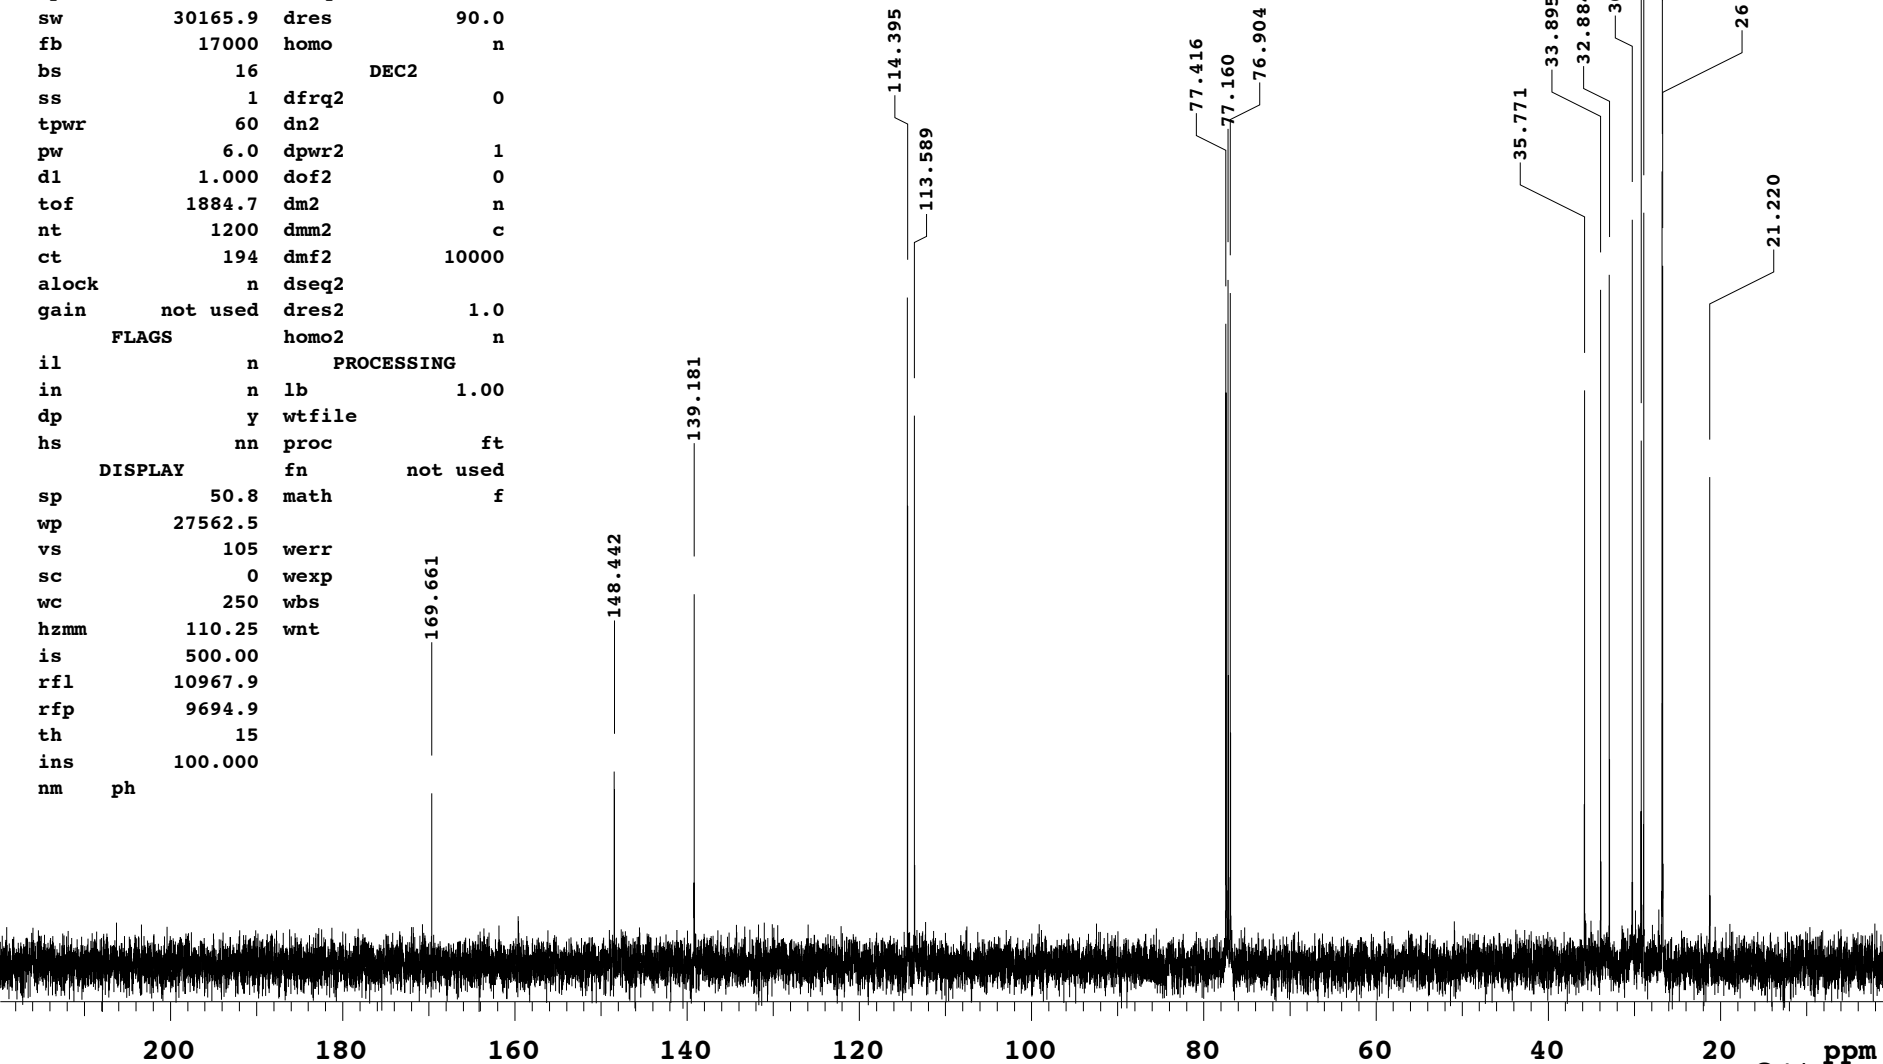

expl s2pul

| SAMPLE              |                | DEC. & VT  |          |
|---------------------|----------------|------------|----------|
| date                | Jul 2 2012     | dfrq       | 500.070  |
| solvent             | CDC13          | dn         | H1       |
| file                | /export/home/~ | dpwr       | 18       |
| data/ui500nb/White~ | dof            |            | 0        |
| /bigi/MAB.1552A.cr~ | dm             |            | nnn      |
| ude.fid             | dmm            |            | c        |
| ACQUISITION         |                | dmf        |          |
| sfrq                | 500.070        | dseq       | 200      |
| tn                  | H1             | dres       | 1.0      |
| at                  | 4.096          | homo       | n        |
| np                  | 65536          | DEC2       |          |
| sw                  | 8000.0         | dfrq2      | 0        |
| fb                  | 4000           | dn2        |          |
| bs                  | 16             | dpwr2      | 1        |
| tpwr                | 58             | dof2       | 0        |
| pw                  | 6.5            | dm2        | n        |
| d1                  | 0              | dmm2       | c        |
| tof                 | 0              | dof2       | 200      |
| nt                  | 1              | dseq2      |          |
| ct                  | 1              | dres2      | 1.0      |
| alock               | n              | homo2      | n        |
| gain                | not used       | PROCESSING |          |
| FLAGS               | lb             |            | 0.30     |
| il                  | n              | wtfile     |          |
| in                  | n              | proc       | ft       |
| dp                  | y              | fn         | not used |
| hs                  | nn             | math       | f        |
| DISPLAY             |                |            |          |
| sp                  | -995.5         | werr       |          |
| wp                  | 7004.2         | wexp       |          |
| vs                  | 82             | wbs        |          |
| sc                  | 0              | wnt        |          |
| wc                  | 250            |            |          |
| hzmm                | 28.02          |            |          |
| is                  | 33.57          |            |          |
| rfl                 | 5141.4         |            |          |
| rfp                 | 3630.5         |            |          |
| th                  | 7              |            |          |
| ins                 | 100.000        |            |          |
| ai                  | ph             |            |          |

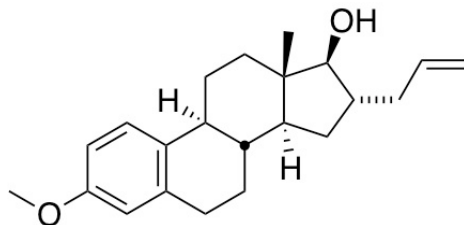

11 10 9 8 7 6 5 4 3 2 1 -0 -1 ppm

S42

expl s2pul

|             |             |            |          |
|-------------|-------------|------------|----------|
| SAMPLE      |             | DEC. & VT  |          |
| date        | Feb 26 2013 | dfrq       | 499.432  |
| solvent     | CDC13       | dn         | H1       |
| file        | exp         | dpwr       | 47       |
| ACQUISITION |             | dof        | -827.0   |
| sfrq        | 125.596     | dm         | YYY      |
| tn          | C13         | dmm        | w        |
| at          | 1.024       | dmf        | 15873    |
| np          | 65536       | dseq       |          |
| sw          | 32000.0     | dres       | 1.0      |
| fb          | 18000       | homo       | n        |
| bs          | 16          | DEC2       |          |
| ss          | 1           | dfrq2      | 0        |
| tpwr        | 63          | dn2        |          |
| pw          | 4.5         | dpwr2      | 1        |
| d1          | 1.000       | dof2       | 0        |
| tof         | 1880.0      | dm2        | n        |
| nt          | 1200        | dmm2       | c        |
| ct          | 66          | dmf2       | 18519    |
| alock       | n           | dseq2      |          |
| gain        | not used    | dres2      | 1.0      |
| FLAGS       |             | homo2      | n        |
| il          | n           | PROCESSING |          |
| in          | n           | lb         | 1.00     |
| dp          | y           | wtfile     |          |
| hs          | nn          | proc       | ft       |
| DISPLAY     |             | fn         | not used |
| sp          | -155.8      | math       | f        |
| wp          | 27782.2     |            |          |
| vs          | 92          | werr       |          |
| sc          | 0           | wexp       |          |
| wc          | 250         | wbs        |          |
| hzmm        | 111.13      | wnt        |          |
| is          | 500.00      |            |          |
| rfl         | 11907.2     |            |          |
| rfp         | 9689.9      |            |          |
| th          | 19          |            |          |
| ins         | 100.000     |            |          |
| nm          | ph          |            |          |

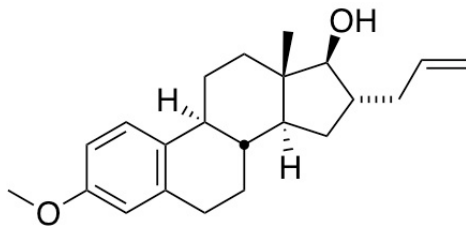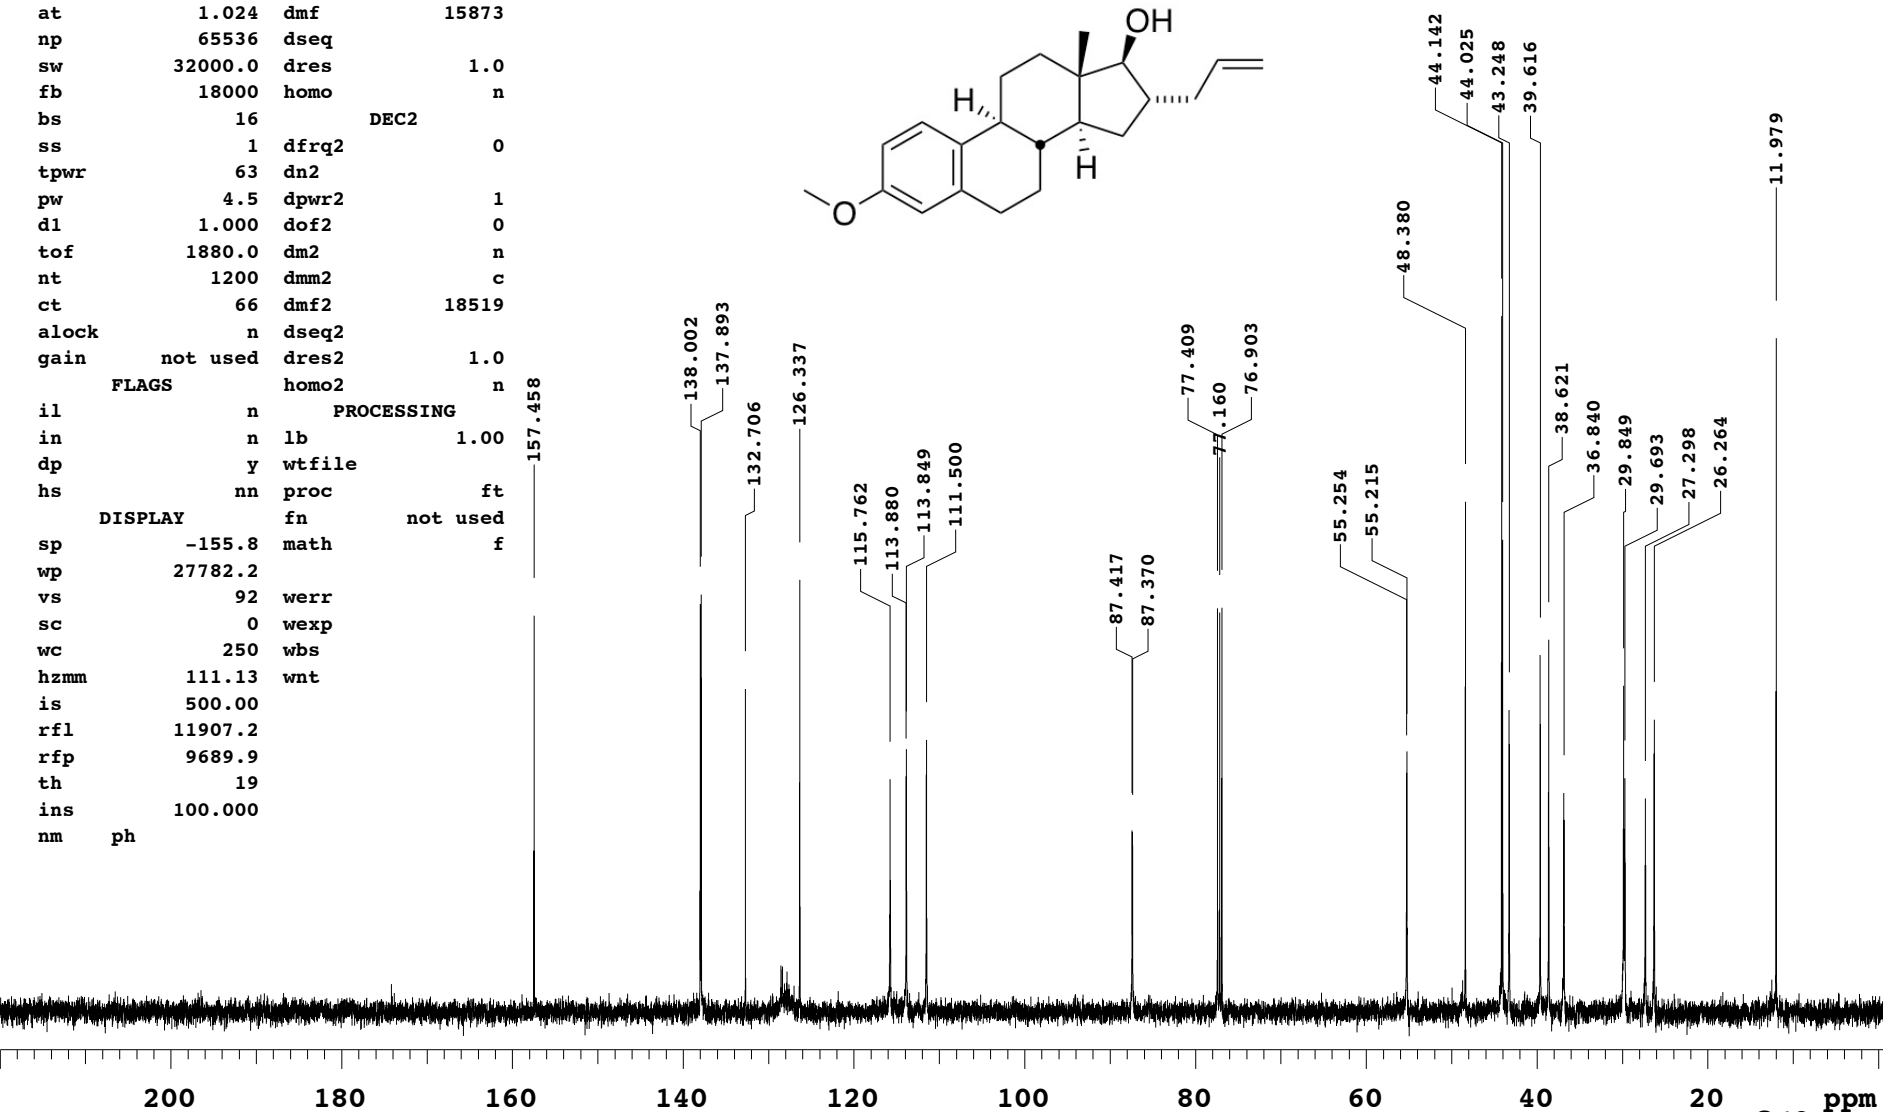

expl s2pul

| SAMPLE              |                | DEC. & VT  |          |
|---------------------|----------------|------------|----------|
| date                | Feb 26 2013    | dfrq       | 499.693  |
| solvent             | CDC13          | dn         | H1       |
| file                | /export/home/~ | dpwr       | 20       |
| data/u500/White/bi~ | dof            |            | 0        |
| gi/MAB.1556A.OH.pr~ | dm             | nnn        |          |
| oton.fid            | dmm            | c          |          |
| ACQUISITION         |                | dmf        |          |
| sfrq                | 499.693        | dseq       |          |
| tn                  | H1             | dres       | 1.0      |
| at                  | 4.665          | homo       | n        |
| np                  | 65536          | DEC2       |          |
| sw                  | 7024.9         | dfrq2      | 0        |
| fb                  | 4000           | dn2        |          |
| bs                  | 4              | dpwr2      | 1        |
| tpwr                | 60             | dof2       | 0        |
| pw                  | 6.5            | dm2        | n        |
| d1                  | 10.000         | dmm2       | c        |
| tof                 | 2.0            | dmf2       | 200      |
| nt                  | 4              | dseq2      |          |
| ct                  | 4              | dres2      | 1.0      |
| alock               | n              | homo2      | n        |
| gain                | not used       | PROCESSING |          |
| FLAGS               | lb             |            | 0.30     |
| il                  | n              | wtfile     |          |
| in                  | n              | proc       | ft       |
| dp                  | y              | fn         | not used |
| hs                  | nn             | math       | f        |
| DISPLAY             |                |            |          |
| sp                  | -1012.6        | werr       |          |
| wp                  | 7024.7         | wexp       |          |
| vs                  | 93             | wbs        |          |
| sc                  | 0              | wnt        |          |
| wc                  | 250            |            |          |
| hzmm                | 28.10          |            |          |
| is                  | 33.57          |            |          |
| rfl                 | 4640.6         |            |          |
| rfp                 | 3627.8         |            |          |
| th                  | 7              |            |          |
| ins                 | 100.000        |            |          |
| ai                  | ph             |            |          |

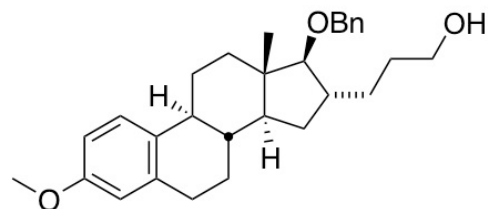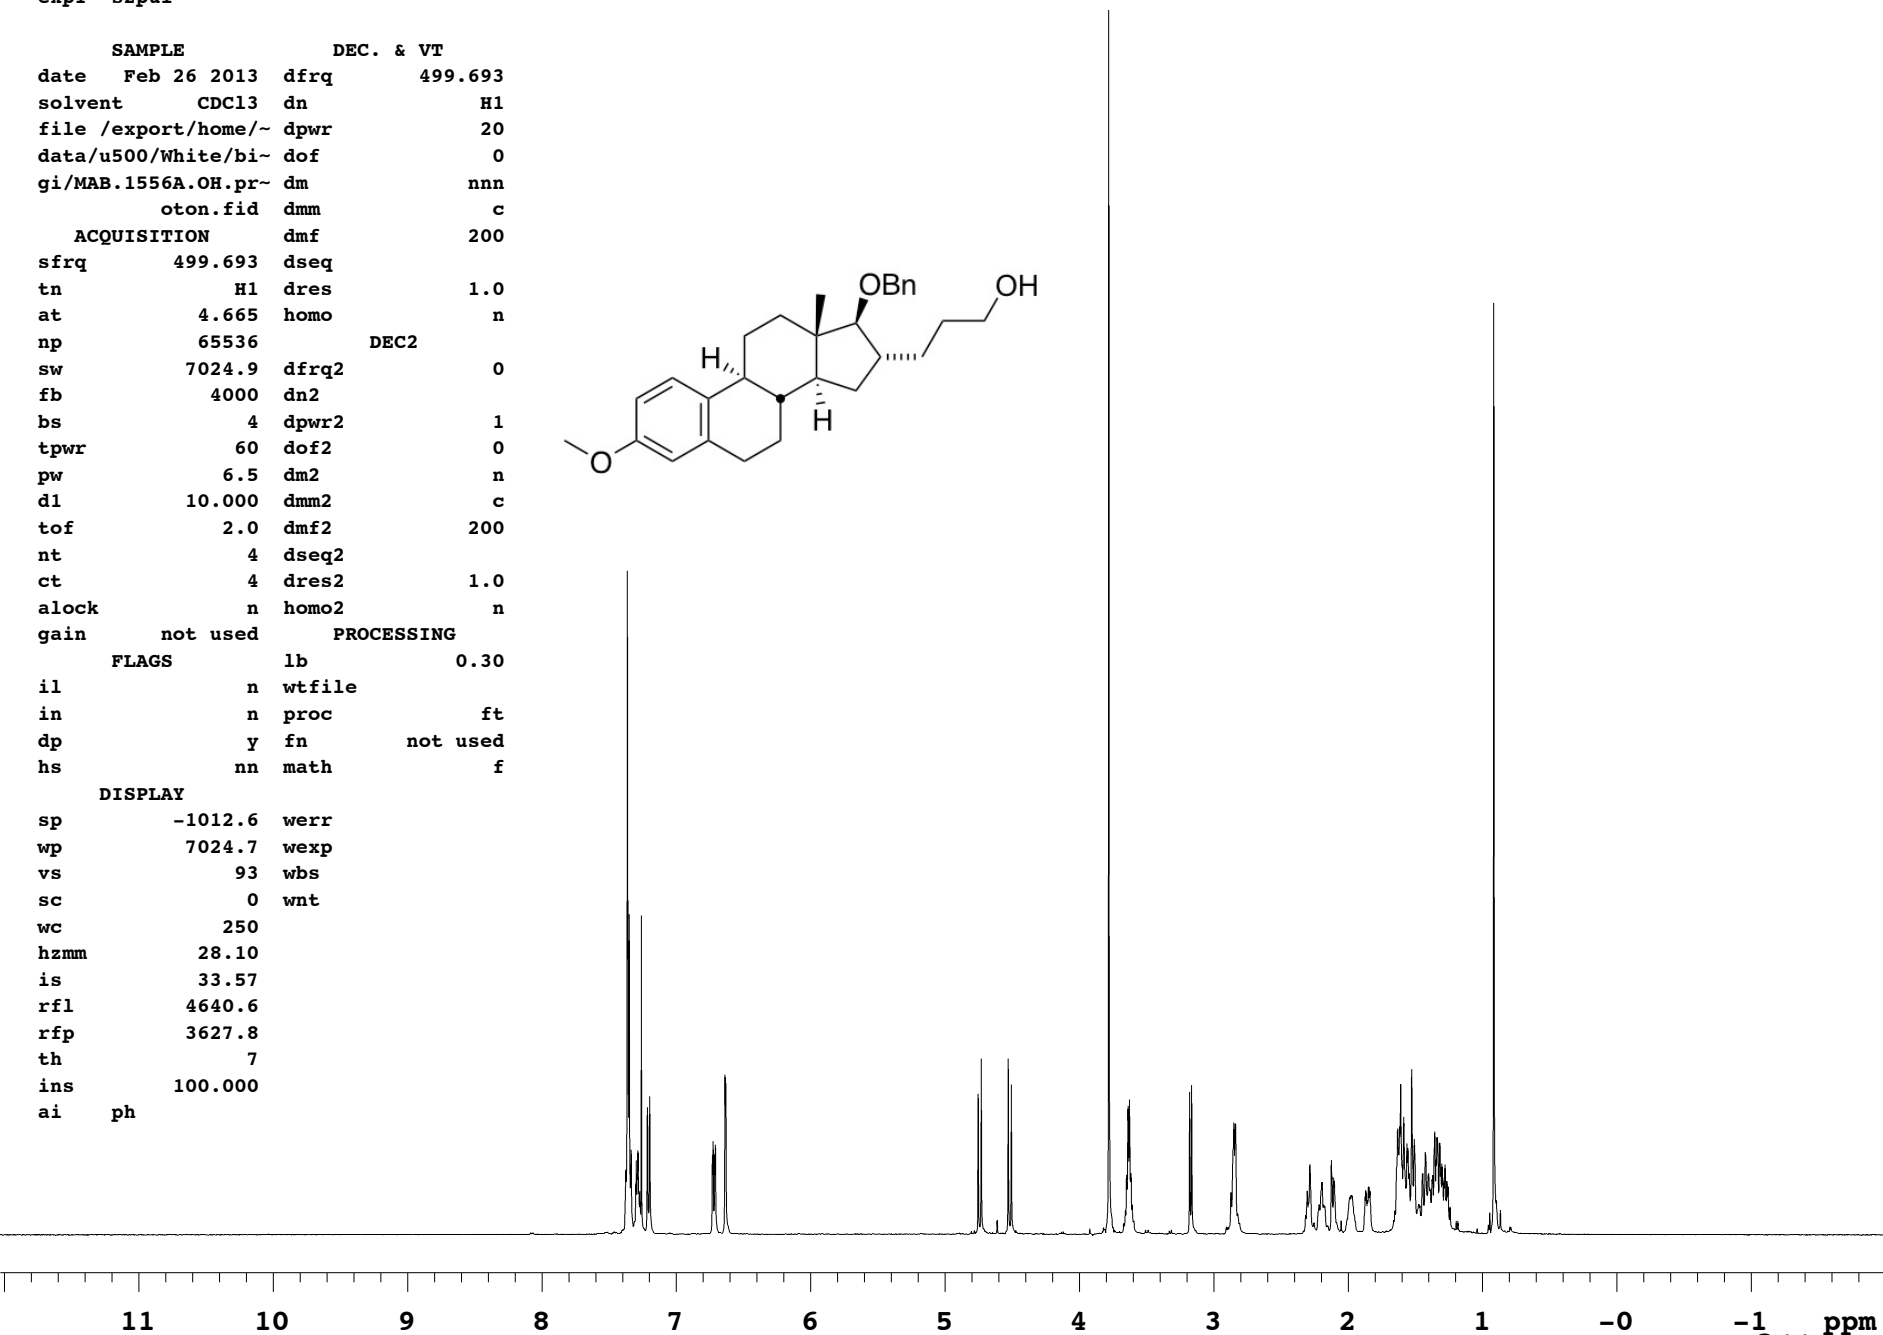

11 10 9 8 7 6 5 4 3 2 1 -0 -1 ppm

expl s2pul

| SAMPLE      |             | DEC. & VT  |         |
|-------------|-------------|------------|---------|
| date        | Feb 26 2013 | dfrq       | 499.692 |
| solvent     | CDC13       | dn         | H1      |
| file        | exp         | dpwr       | 45      |
| ACQUISITION |             | dof        |         |
| sfrq        | 125.661     | dm         | YYY     |
| tn          | C13         | dmm        | w       |
| at          | 1.086       | dmf        | 20202   |
| np          | 65536       | dseq       |         |
| sw          | 30165.9     | dres       | 90.0    |
| fb          | 17000       | homo       | n       |
| bs          | 16          | DEC2       |         |
| ss          | 1           | dfrq2      | 0       |
| tpwr        | 60          | dn2        |         |
| pw          | 6.0         | dpwr2      | 1       |
| d1          | 1.000       | dof2       | 0       |
| tof         | 1884.7      | dm2        | n       |
| nt          | 1200        | dmm2       | c       |
| ct          | 267         | dmf2       | 10000   |
| alock       | n           | dseq2      |         |
| gain        | not used    | dres2      | 1.0     |
| FLAGS       |             | homo2      |         |
| il          | n           | PROCESSING |         |
| in          | n           | lb         | 1.00    |
| dp          | y           | wtfile     |         |
| hs          | nn          | proc       | ft      |
| DISPLAY     |             | fn         |         |
| sp          | 5.7         | math       | f       |
| wp          | 27650.9     | werr       |         |
| vs          | 162         | wexp       |         |
| sc          | 0           | wbs        |         |
| wc          | 250         | wnt        |         |
| hzmm        | 110.60      |            |         |
| is          | 500.00      |            |         |
| rfl         | 10968.8     |            |         |
| rfp         | 9694.9      |            |         |
| th          | 12          |            |         |
| ins         | 100.000     |            |         |
| nm          | ph          |            |         |

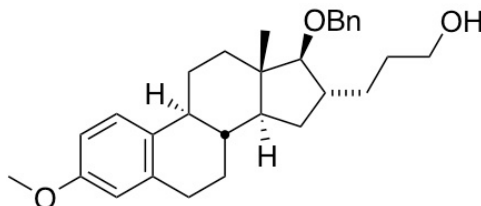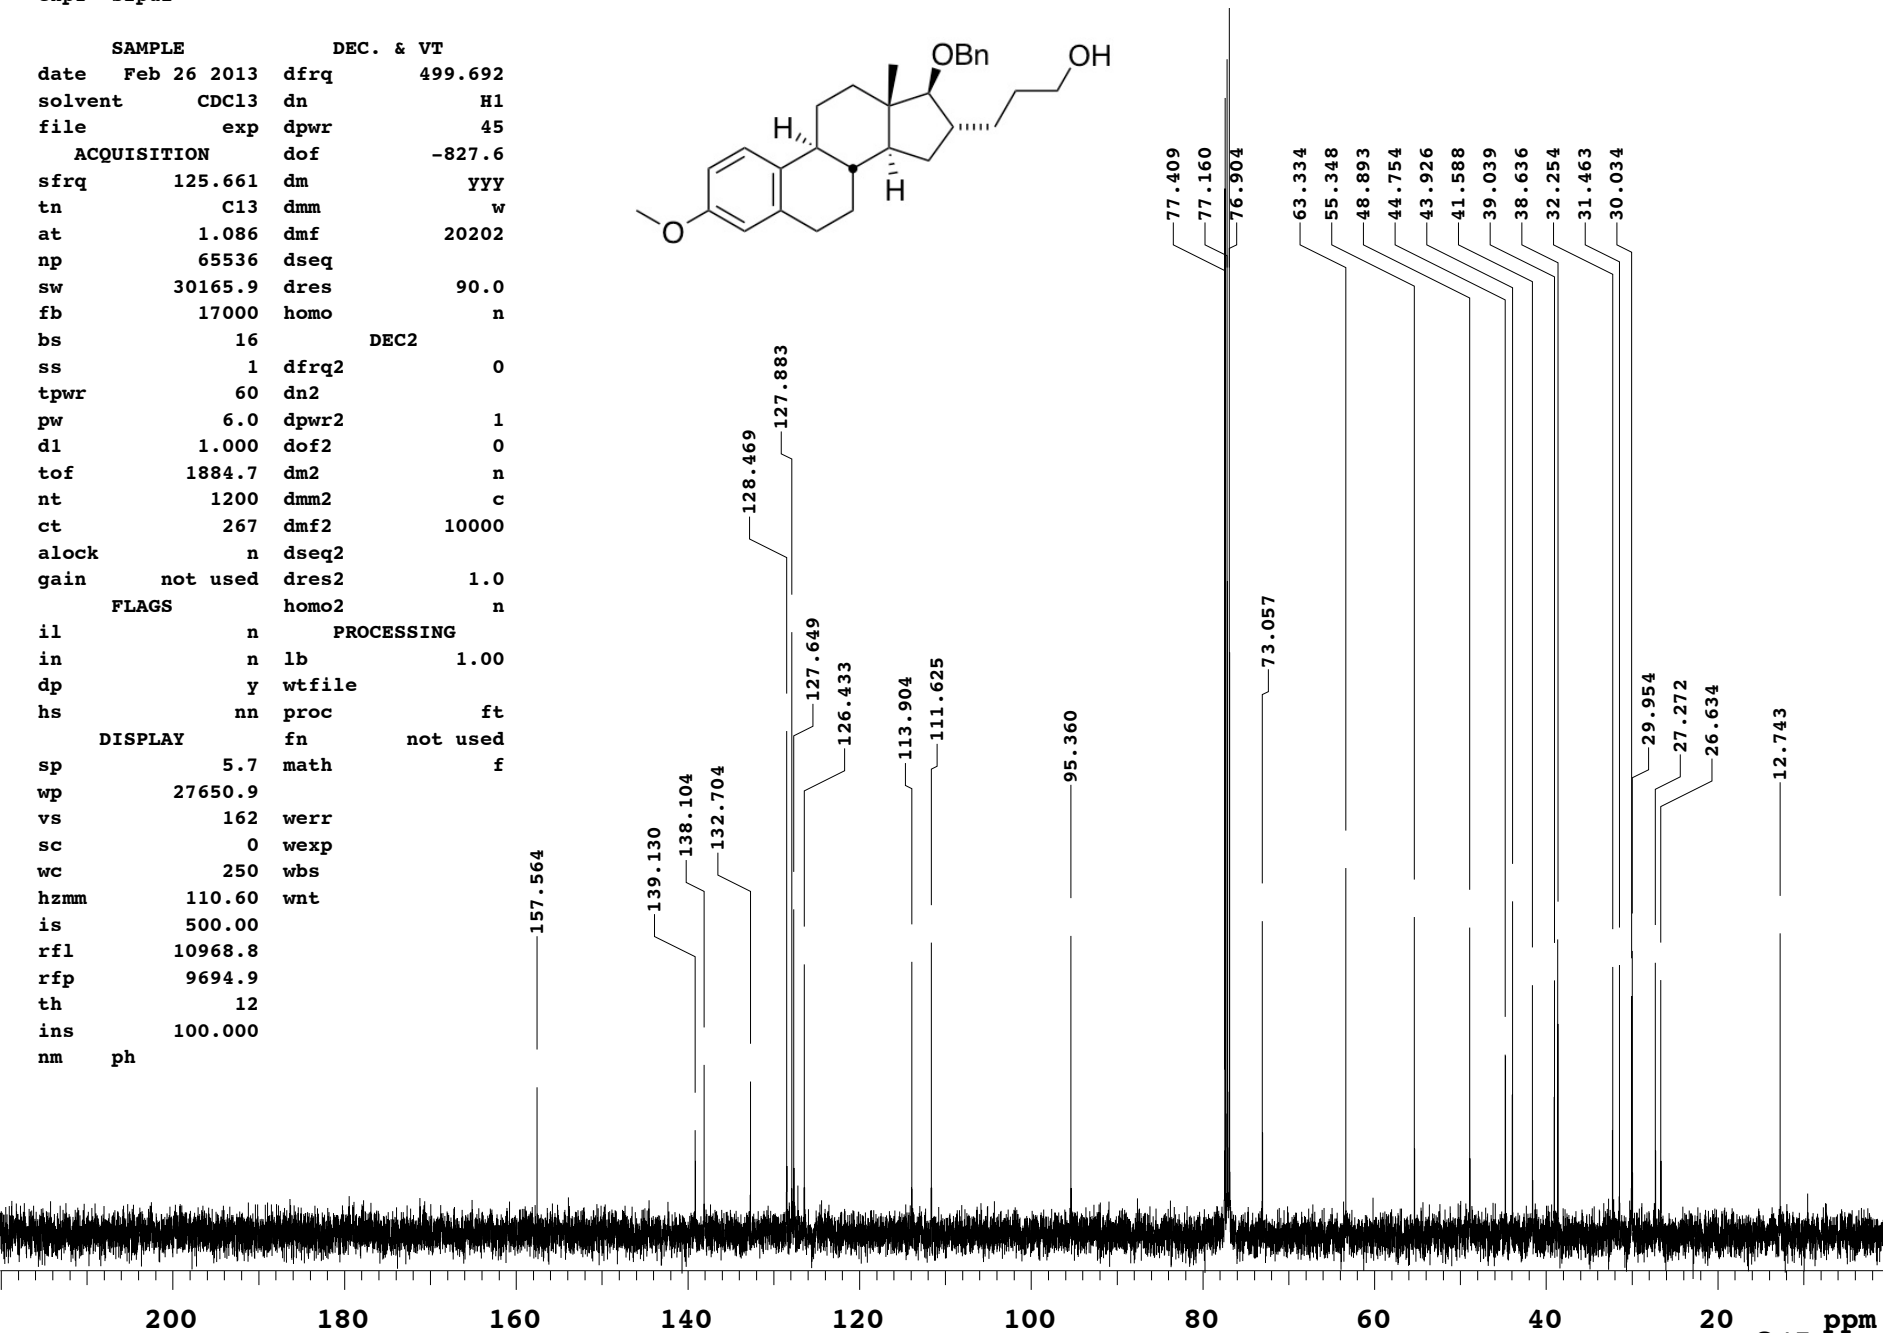

expl s2pul

| SAMPLE      |             | DEC. & VT  |          |
|-------------|-------------|------------|----------|
| date        | Feb 25 2013 | dfrq       | 500.070  |
| solvent     | CDC13       | dn         | H1       |
| file        | exp         | dpwr       | 18       |
| ACQUISITION |             | dof        | 0        |
| sfrq        | 500.070     | dm         | nnn      |
| tn          | H1          | dmm        | c        |
| at          | 4.096       | dmf        | 200      |
| np          | 65536       | dseq       |          |
| sw          | 8000.0      | dres       | 1.0      |
| fb          | 4000        | homo       | n        |
| bs          | 16          | DEC2       |          |
| tpwr        | 58          | dfrq2      | 0        |
| pw          | 6.5         | dn2        |          |
| d1          | 10.000      | dpwr2      | 1        |
| tof         | 0           | dof2       | 0        |
| nt          | 1           | dm2        | n        |
| ct          | 1           | dmm2       | c        |
| alock       | n           | dmf2       | 200      |
| gain        | not used    | dseq2      |          |
| FLAGS       |             | dres2      | 1.0      |
| il          | n           | homo2      | n        |
| in          | n           | PROCESSING |          |
| dp          | y           | lb         | 0.30     |
| hs          | nn          | wtfile     |          |
| DISPLAY     |             | proc       | ft       |
| sp          | -995.2      | fn         | not used |
| wp          | 6992.4      | math       | f        |
| vs          | 61          |            |          |
| sc          | 0           | werr       |          |
| wc          | 250         | wexp       |          |
| hzmm        | 27.97       | wbs        |          |
| is          | 1698.60     | wnt        |          |
| rfl         | 1510.6      |            |          |
| rfp         | 0           |            |          |
| th          | 7           |            |          |
| ins         | 1.000       |            |          |
| ai          | ph          |            |          |

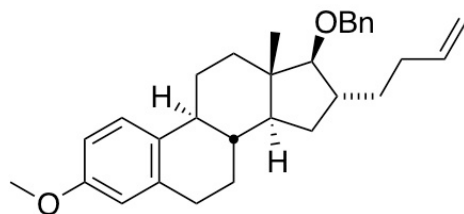

11 10 9 8 7 6 5 4 3 2 1 -0 -1 ppm

expl s2pul

|             |             |            |          |
|-------------|-------------|------------|----------|
| SAMPLE      |             | DEC. & VT  |          |
| date        | Feb 25 2013 | dfrq       | 499.432  |
| solvent     | CDC13       | dn         | H1       |
| file        | exp         | dpwr       | 47       |
| ACQUISITION |             | dof        | -827.0   |
| sfrq        | 125.596     | dm         | YYY      |
| tn          | C13         | dmm        | w        |
| at          | 1.024       | dmf        | 15873    |
| np          | 65536       | dseq       |          |
| sw          | 32000.0     | dres       | 1.0      |
| fb          | 18000       | homo       | n        |
| bs          | 16          |            | DEC2     |
| ss          | 1           | dfrq2      | 0        |
| tpwr        | 63          | dn2        |          |
| pw          | 4.5         | dpwr2      | 1        |
| d1          | 1.000       | dof2       | 0        |
| tof         | 1880.0      | dm2        | n        |
| nt          | 1200        | dmm2       | c        |
| ct          | 362         | dmf2       | 18519    |
| alock       | n           | dseq2      |          |
| gain        | not used    | dres2      | 1.0      |
| FLAGS       |             | homo2      | n        |
| il          | n           | PROCESSING |          |
| in          | n           | lb         | 1.00     |
| dp          | y           | wtfile     |          |
| hs          | nn          | proc       | ft       |
| DISPLAY     |             | fn         | not used |
| sp          | -15.2       | math       | f        |
| wp          | 27577.1     |            |          |
| vs          | 162         | werr       |          |
| sc          | 0           | wexp       |          |
| wc          | 250         | wbs        |          |
| hzmm        | 110.31      | wnt        |          |
| is          | 500.00      |            |          |
| rfl         | 11892.6     |            |          |
| rfp         | 9689.9      |            |          |
| th          | 10          |            |          |
| ins         | 100.000     |            |          |
| nm          | ph          |            |          |

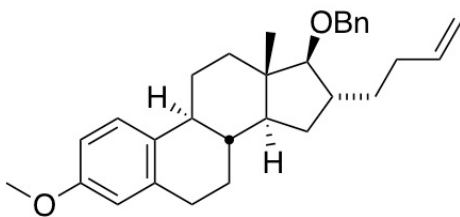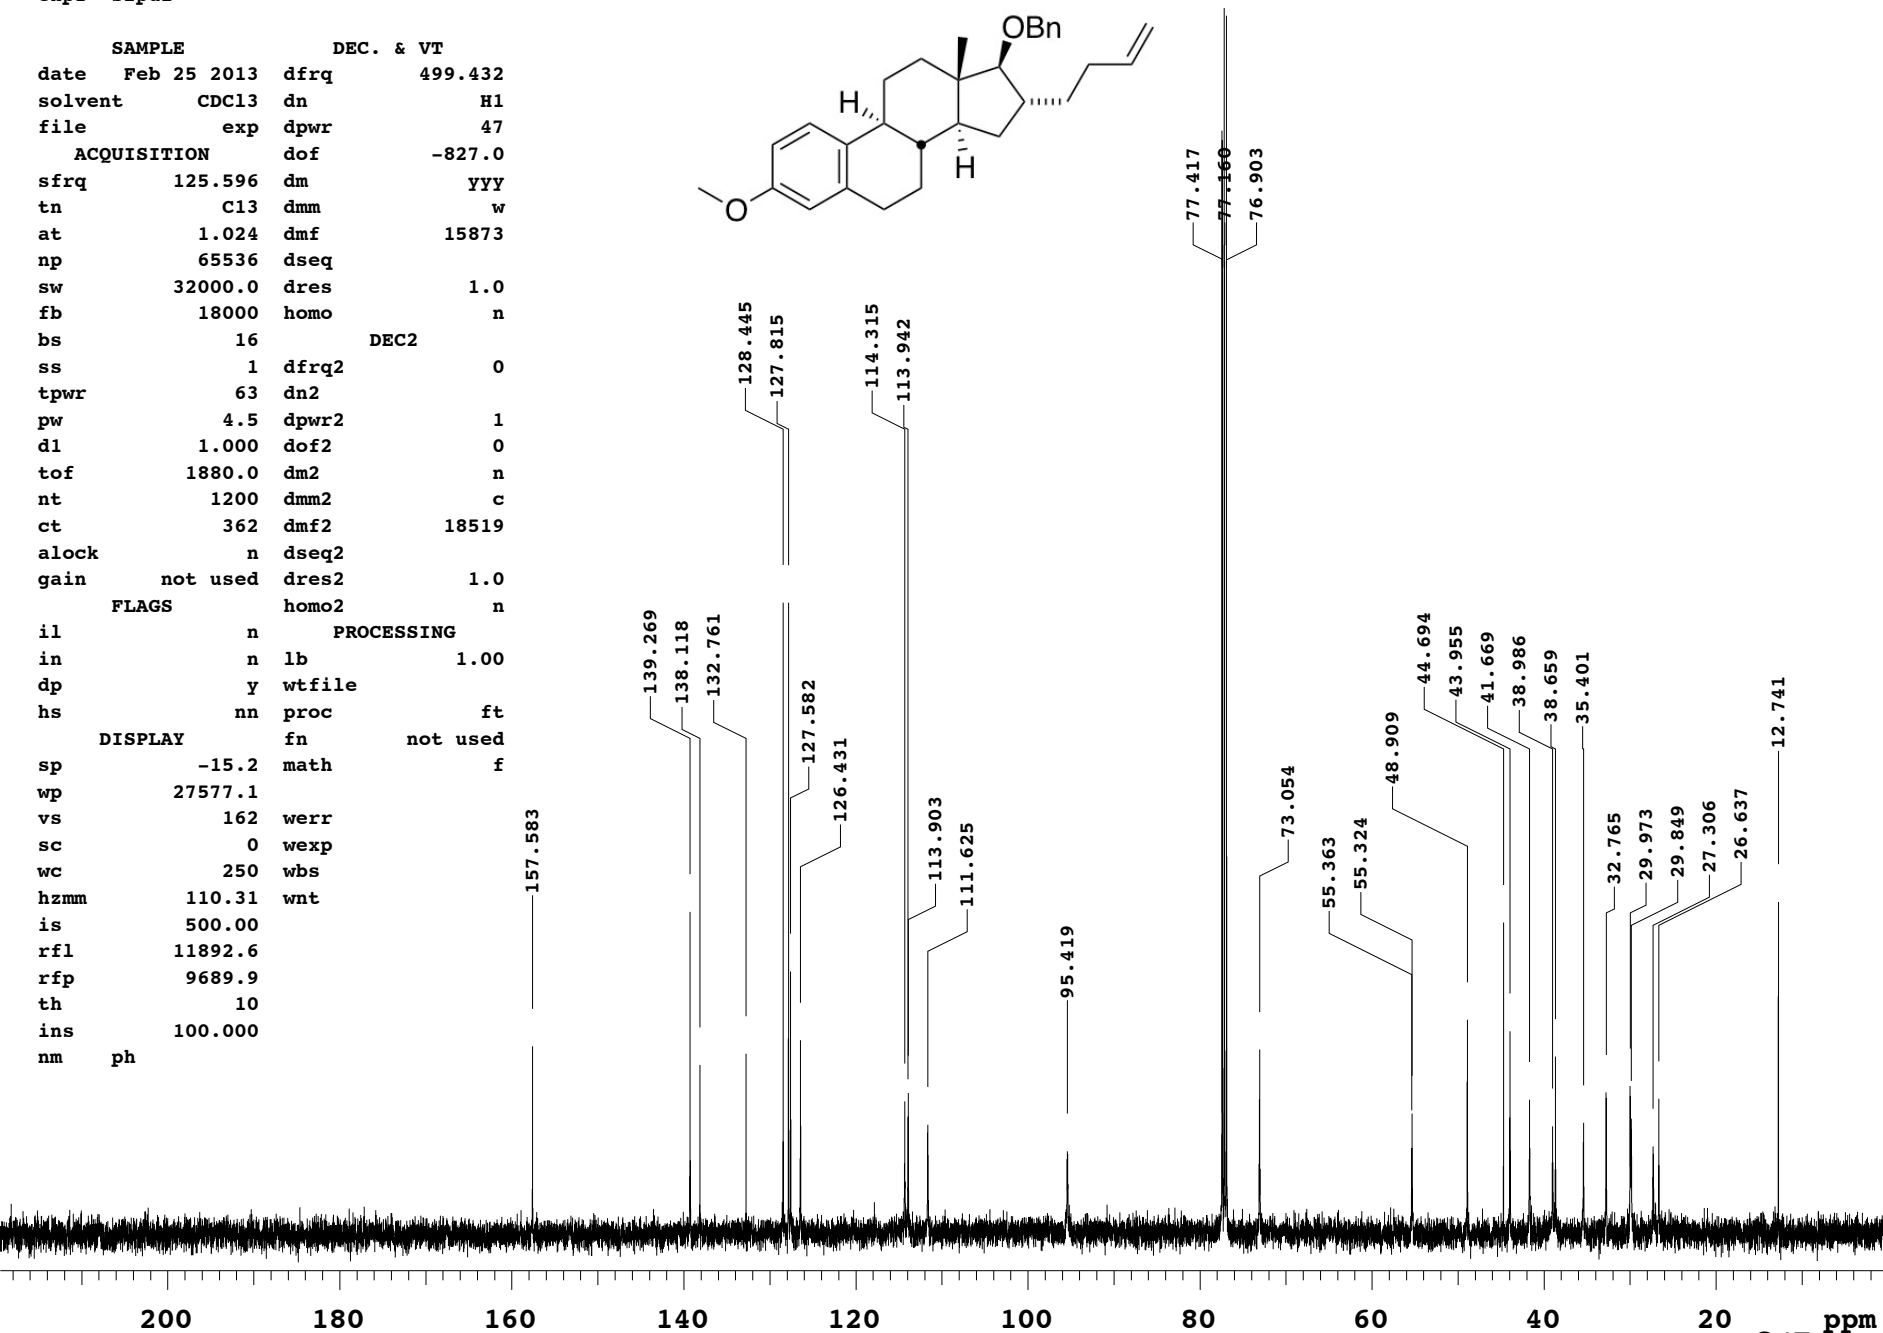

expl s2pul

| SAMPLE              |                | DEC. & VT |         |
|---------------------|----------------|-----------|---------|
| date                | Jan 23 2013    | dfrq      | 500.070 |
| solvent             | CDC13          | dn        | H1      |
| file                | /export/home/~ | dpwr      | 18      |
| data/ui500nb/White~ |                | dof       | 0       |
| /bigi/MAB.nonenylO~ |                | dm        | nnn     |
| Ac.Wacker.proton.f~ |                | dmm       | c       |
|                     |                | id        | dmf     |
|                     |                |           | 200     |

| ACQUISITION |         |       |     |
|-------------|---------|-------|-----|
| sfrq        | 500.070 | dres  | 1.0 |
| tn          | H1      | homo  | n   |
| at          | 4.096   | DEC2  |     |
| np          | 65536   | dfrq2 | 0   |
| sw          | 8000.0  | dn2   |     |
| fb          | 4000    | dpwr2 | 1   |
| bs          | 16      | dof2  | 0   |
| tpwr        | 58      | dm2   | n   |
| pw          | 6.5     | dmm2  | c   |
| d1          | 15.000  | dmf2  | 200 |
| tof         | 0       | dseq2 |     |
| nt          | 8       | dres2 | 1.0 |
| ct          | 8       | homo2 | n   |

| PROCESSING |          |    |      |
|------------|----------|----|------|
| alock      | n        | lb | 0.30 |
| gain       | not used |    |      |

| FLAGS |    |      |          |
|-------|----|------|----------|
| il    | n  | proc | ft       |
| in    | n  | fn   | not used |
| dp    | y  | math | f        |
| hs    | nn |      |          |

| DISPLAY |         |      |  |
|---------|---------|------|--|
| sp      | -1041.9 | wexp |  |
| wp      | 7051.0  | wbs  |  |
| vs      | 50      | wnt  |  |
| sc      | 0       |      |  |
| wc      | 250     |      |  |
| hzmm    | 28.20   |      |  |
| is      | 33.57   |      |  |
| rfl     | 5141.1  |      |  |
| rfp     | 3630.5  |      |  |
| th      | 7       |      |  |
| ins     | 100.000 |      |  |
| ai      | ph      |      |  |

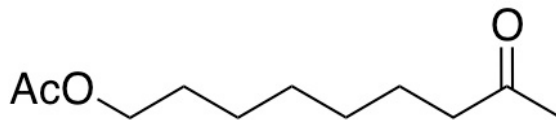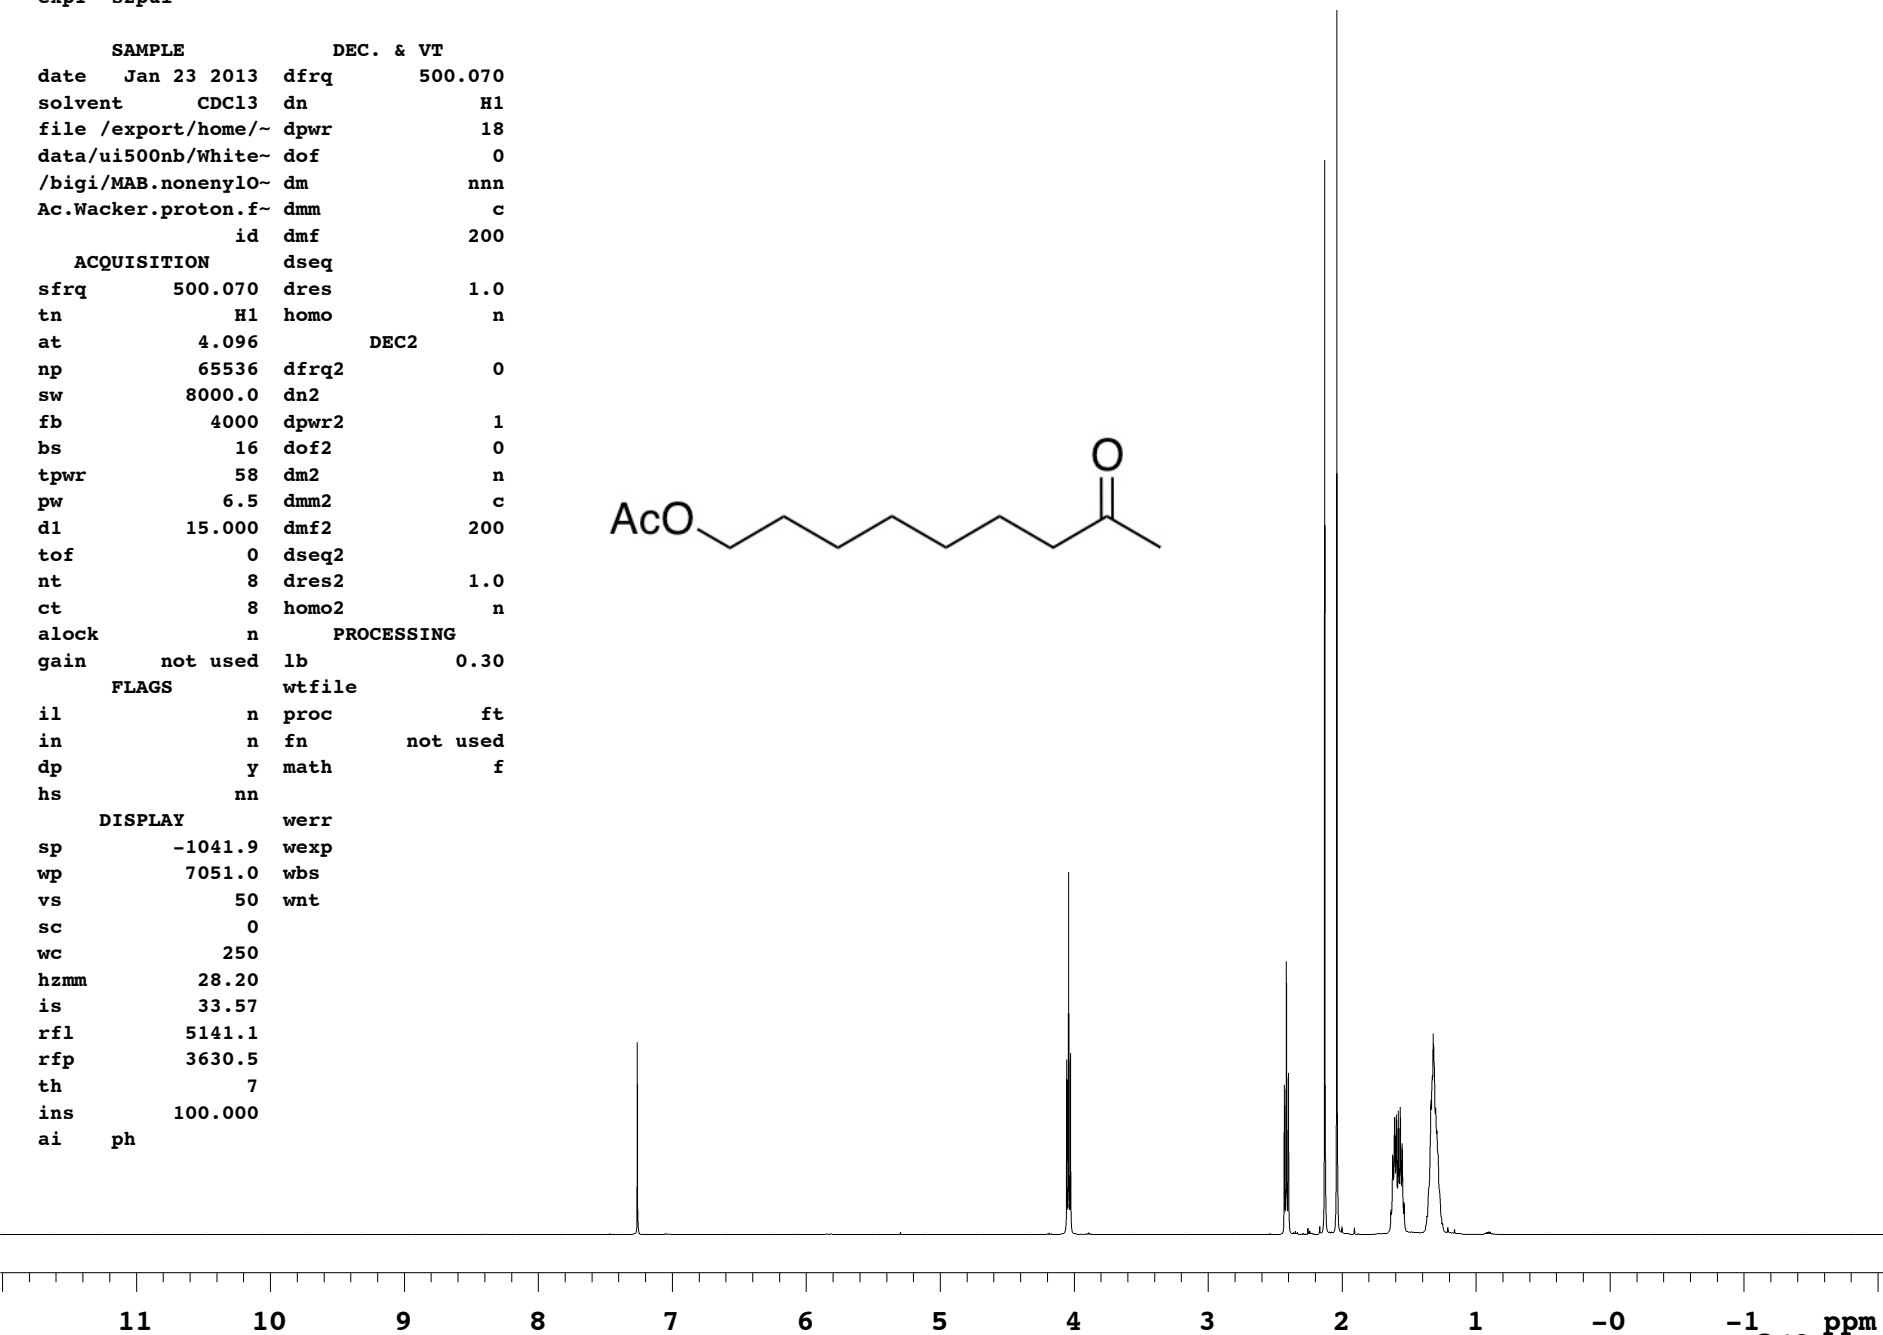



expl s2pul

| SAMPLE              |                | DEC. & VT  |          |
|---------------------|----------------|------------|----------|
| date                | Jan 23 2013    | dfrq       | 499.692  |
| solvent             | CDC13          | dn         | H1       |
| file                | /export/home/~ | dpwr       | 45       |
| data/u500/White/bi~ | dof            | -827.6     |          |
| gi/MAB.nonenylOAc.~ | dm             | YYY        |          |
| Wacker.carbon.fid   | dmm            | w          |          |
| ACQUISITION         |                | dmf        |          |
| sfrq                | 125.661        | dseq       | 20202    |
| tn                  | C13            | dres       | 90.0     |
| at                  | 1.086          | homo       | n        |
| np                  | 65536          | DEC2       |          |
| sw                  | 30165.9        | dfrq2      | 0        |
| fb                  | 17000          | dn2        |          |
| bs                  | 16             | dpwr2      | 1        |
| ss                  | 1              | dof2       | 0        |
| tpwr                | 60             | dm2        | n        |
| pw                  | 6.0            | dmm2       | c        |
| d1                  | 1.000          | dmf2       | 10000    |
| tof                 | 1884.7         | dseq2      |          |
| nt                  | 1200           | dres2      | 1.0      |
| ct                  | 128            | homo2      | n        |
| alock               | n              | PROCESSING |          |
| gain                | not used       | lb         | 1.00     |
| FLAGS               |                | wtfile     |          |
| il                  | n              | proc       | ft       |
| in                  | n              | fn         | not used |
| dp                  | y              | math       | f        |
| hs                  | nn             |            |          |
| DISPLAY             |                | werr       |          |
| sp                  | 4.8            | wexp       |          |
| wp                  | 27647.2        | wbs        |          |
| vs                  | 162            | wnt        |          |
| sc                  | 0              |            |          |
| wc                  | 250            |            |          |
| hzmm                | 110.59         |            |          |
| is                  | 500.00         |            |          |
| rfl                 | 10971.6        |            |          |
| rfp                 | 9694.9         |            |          |
| th                  | 12             |            |          |
| ins                 | 100.000        |            |          |
| nm                  | ph             |            |          |

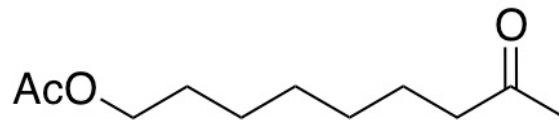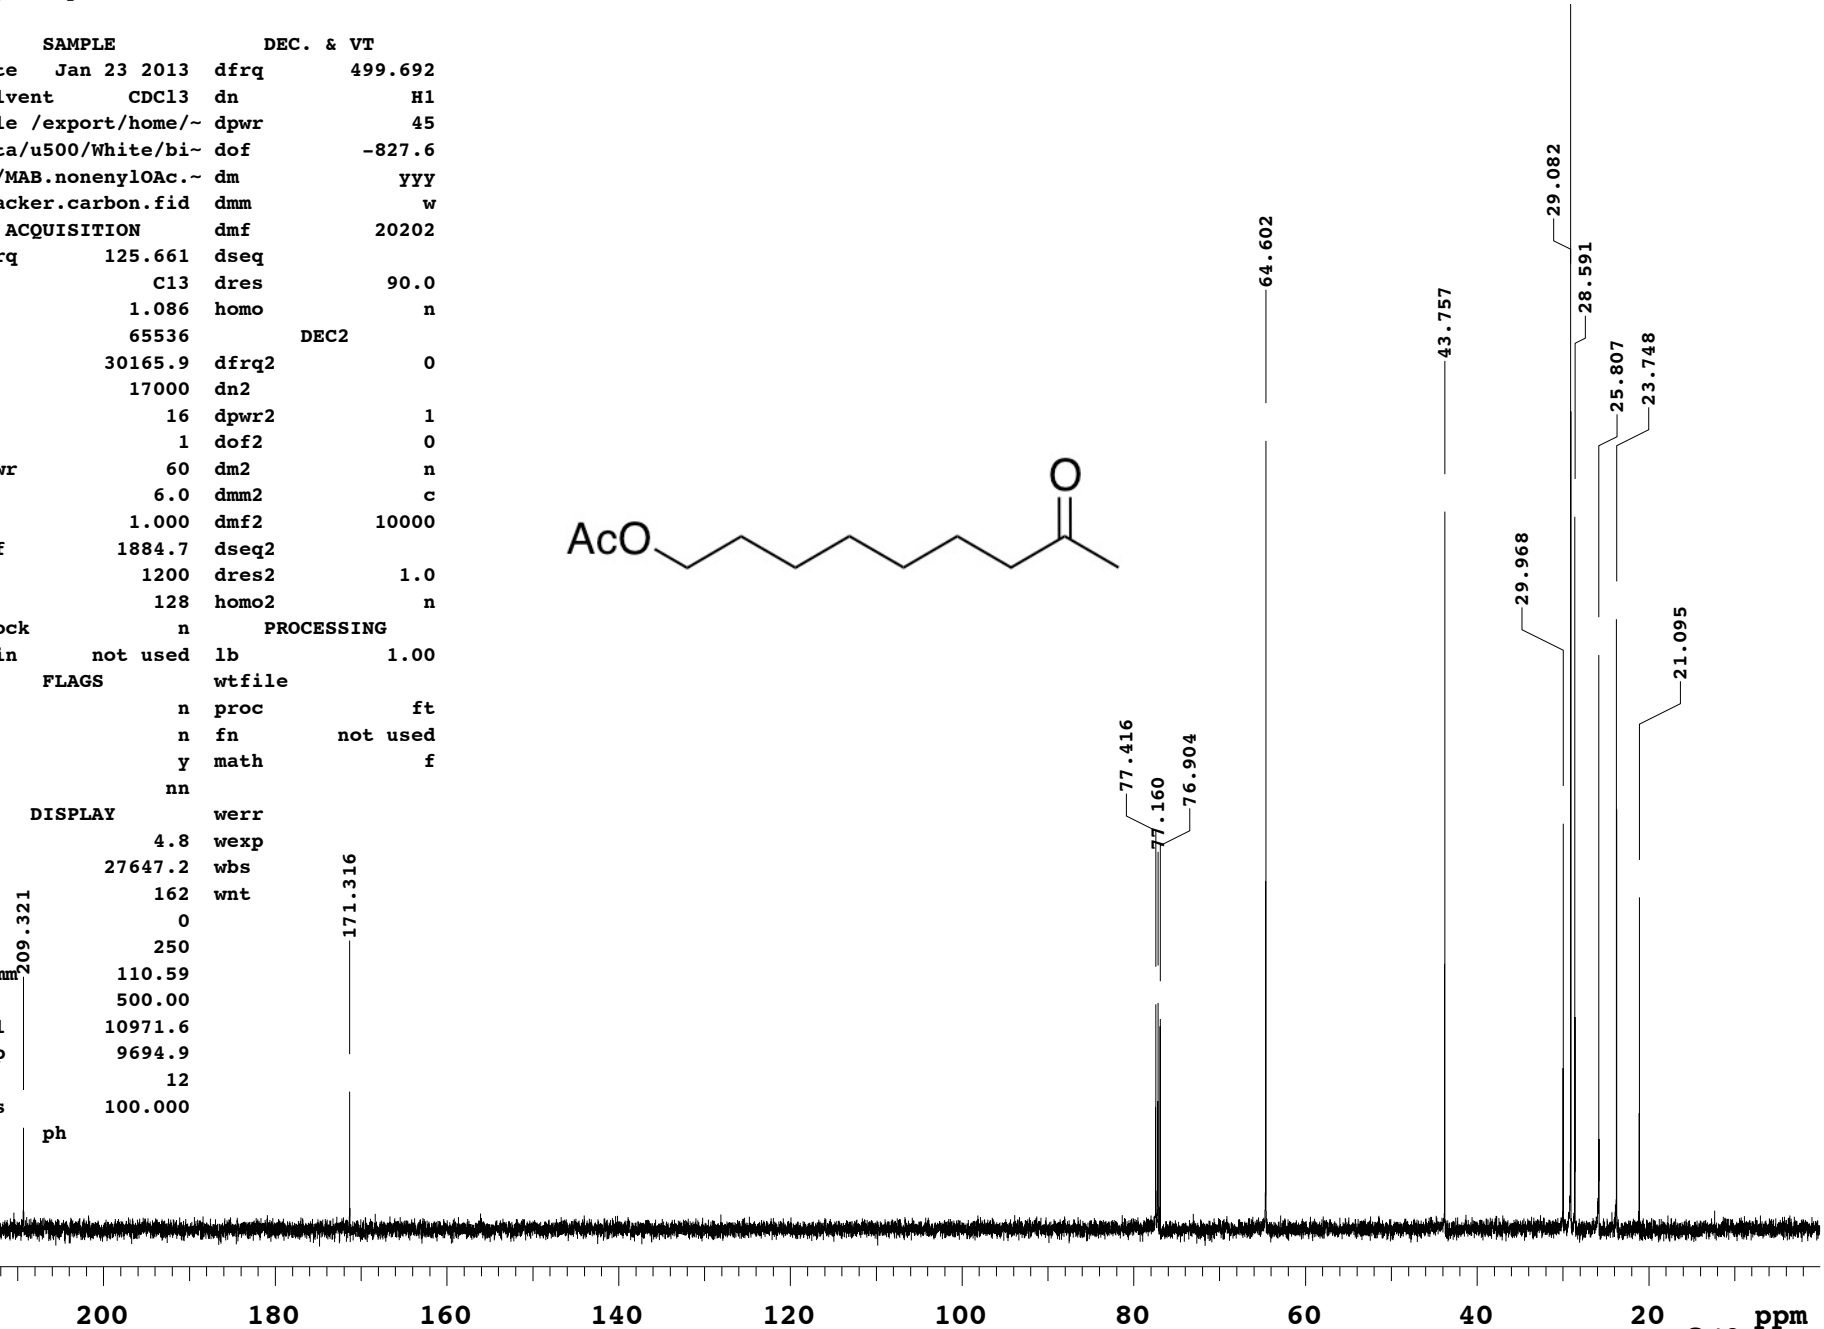

expl s2pul

| SAMPLE              |                | DEC. & VT |         |
|---------------------|----------------|-----------|---------|
| date                | Jan 15 2013    | dfrq      | 500.070 |
| solvent             | CDC13          | dn        | H1      |
| file                | /export/home/~ | dpwr      | 18      |
| data/ui500nb/White~ |                | dof       | 0       |
| /bigi/MAB.1547A.no~ |                | dm        | nnn     |
| nenyloAc.proton.fi~ |                | dmm       | c       |
|                     |                | d         | dmf     |
|                     |                |           | 200     |

| ACQUISITION |         |       |     |
|-------------|---------|-------|-----|
| sfrq        | 500.070 | dres  | 1.0 |
| tn          | H1      | homo  | n   |
| at          | 4.096   | DEC2  |     |
| np          | 65536   | dfrq2 | 0   |
| sw          | 8000.0  | dn2   |     |
| fb          | 4000    | dpwr2 | 1   |
| bs          | 16      | dof2  | 0   |
| tpwr        | 58      | dm2   | n   |
| pw          | 6.5     | dmm2  | c   |
| d1          | 15.000  | dmf2  | 200 |
| tof         | 0       | dseq2 |     |
| nt          | 4       | dres2 | 1.0 |
| ct          | 4       | homo2 | n   |

| PROCESSING |          |    |      |
|------------|----------|----|------|
| alock      | n        | lb | 0.30 |
| gain       | not used |    |      |

| FLAGS |    |      |          |
|-------|----|------|----------|
| il    | n  | proc | ft       |
| in    | n  | fn   | not used |
| dp    | y  | math | f        |
| hs    | nn |      |          |

| DISPLAY |         |      |
|---------|---------|------|
| sp      | -1007.4 | wexp |
| wp      | 7015.9  | wbs  |
| vs      | 76      | wnt  |
| sc      | 0       |      |
| wc      | 250     |      |
| hzmm    | 28.06   |      |
| is      | 33.57   |      |
| rfl     | 5141.6  |      |
| rfp     | 3630.5  |      |
| th      | 7       |      |
| ins     | 100.000 |      |
| ai      | ph      |      |

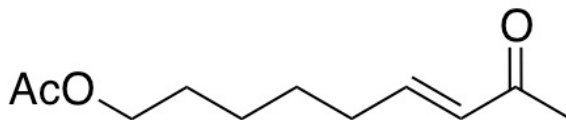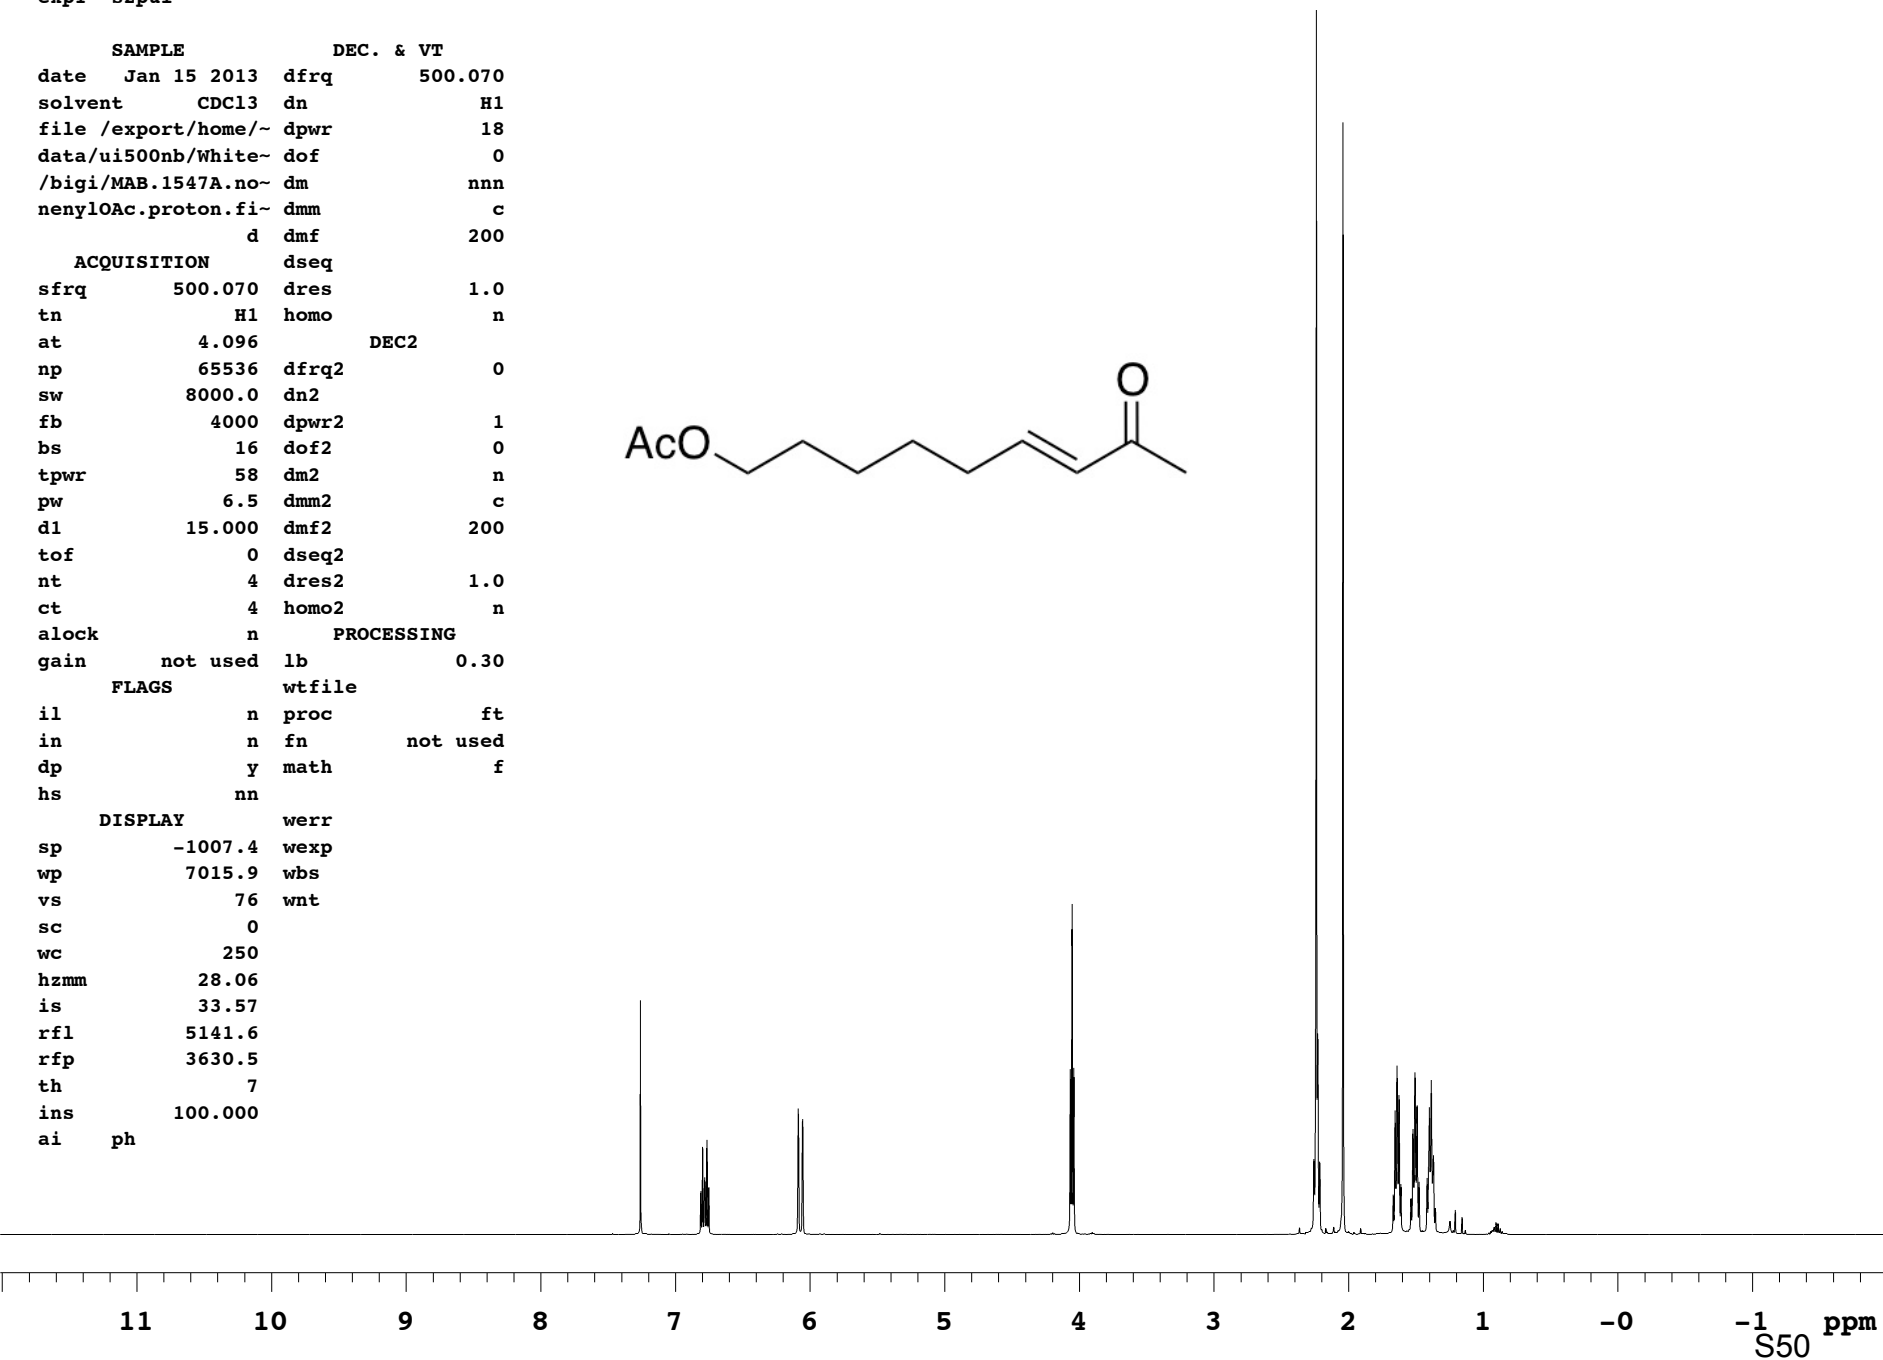

expl s2pul

| SAMPLE              |                | DEC. & VT  |          |
|---------------------|----------------|------------|----------|
| date                | Jan 15 2013    | dfrq       | 499.692  |
| solvent             | CDCl3          | dn         | H1       |
| file                | /export/home/~ | dpwr       | 45       |
| data/u500/White/bi- | dof            | -827.6     |          |
| gi/MAB.1547A.nonen- | dm             | YYY        |          |
| ylOAc.carbon.fid    | dmm            | w          |          |
| ACQUISITION         |                | dmf        | 20202    |
| sfrq                | 125.661        | dseq       |          |
| tn                  | C13            | dres       | 90.0     |
| at                  | 1.086          | homo       | n        |
| np                  | 65536          | DEC2       |          |
| sw                  | 30165.9        | dfrq2      | 0        |
| fb                  | 17000          | dn2        |          |
| bs                  | 16             | dpwr2      | 1        |
| ss                  | 1              | dof2       | 0        |
| tpwr                | 60             | dm2        | n        |
| pw                  | 6.0            | dmm2       | c        |
| d1                  | 1.000          | dmf2       | 10000    |
| tof                 | 1884.7         | dseq2      |          |
| nt                  | 1200           | dres2      | 1.0      |
| ct                  | 128            | homo2      | n        |
| alock               | n              | PROCESSING |          |
| gain                | not used       | lb         | 1.00     |
| FLAGS               |                | wtfile     |          |
| il                  | n              | proc       | ft       |
| in                  | n              | fn         | not used |
| dp                  | y              | math       | f        |
| hs                  | nn             |            |          |
| DISPLAY             |                | werr       |          |
| sp                  | 80             | wexp       |          |
| wp                  | 27691.4        | wbs        |          |
| vs                  | 162            | wnt        |          |
| sc                  | 0              |            |          |
| wc                  | 250            |            |          |
| hzmm                | 110.77         |            |          |
| is                  | 500.00         |            |          |
| rfl                 | 10972.5        |            |          |
| rfp                 | 9694.9         |            |          |
| th                  | 25             |            |          |
| ins                 | 100.000        |            |          |
| nm                  | ph             |            |          |

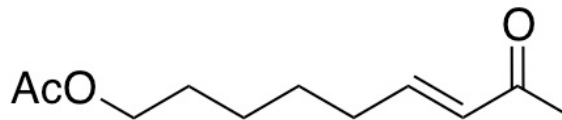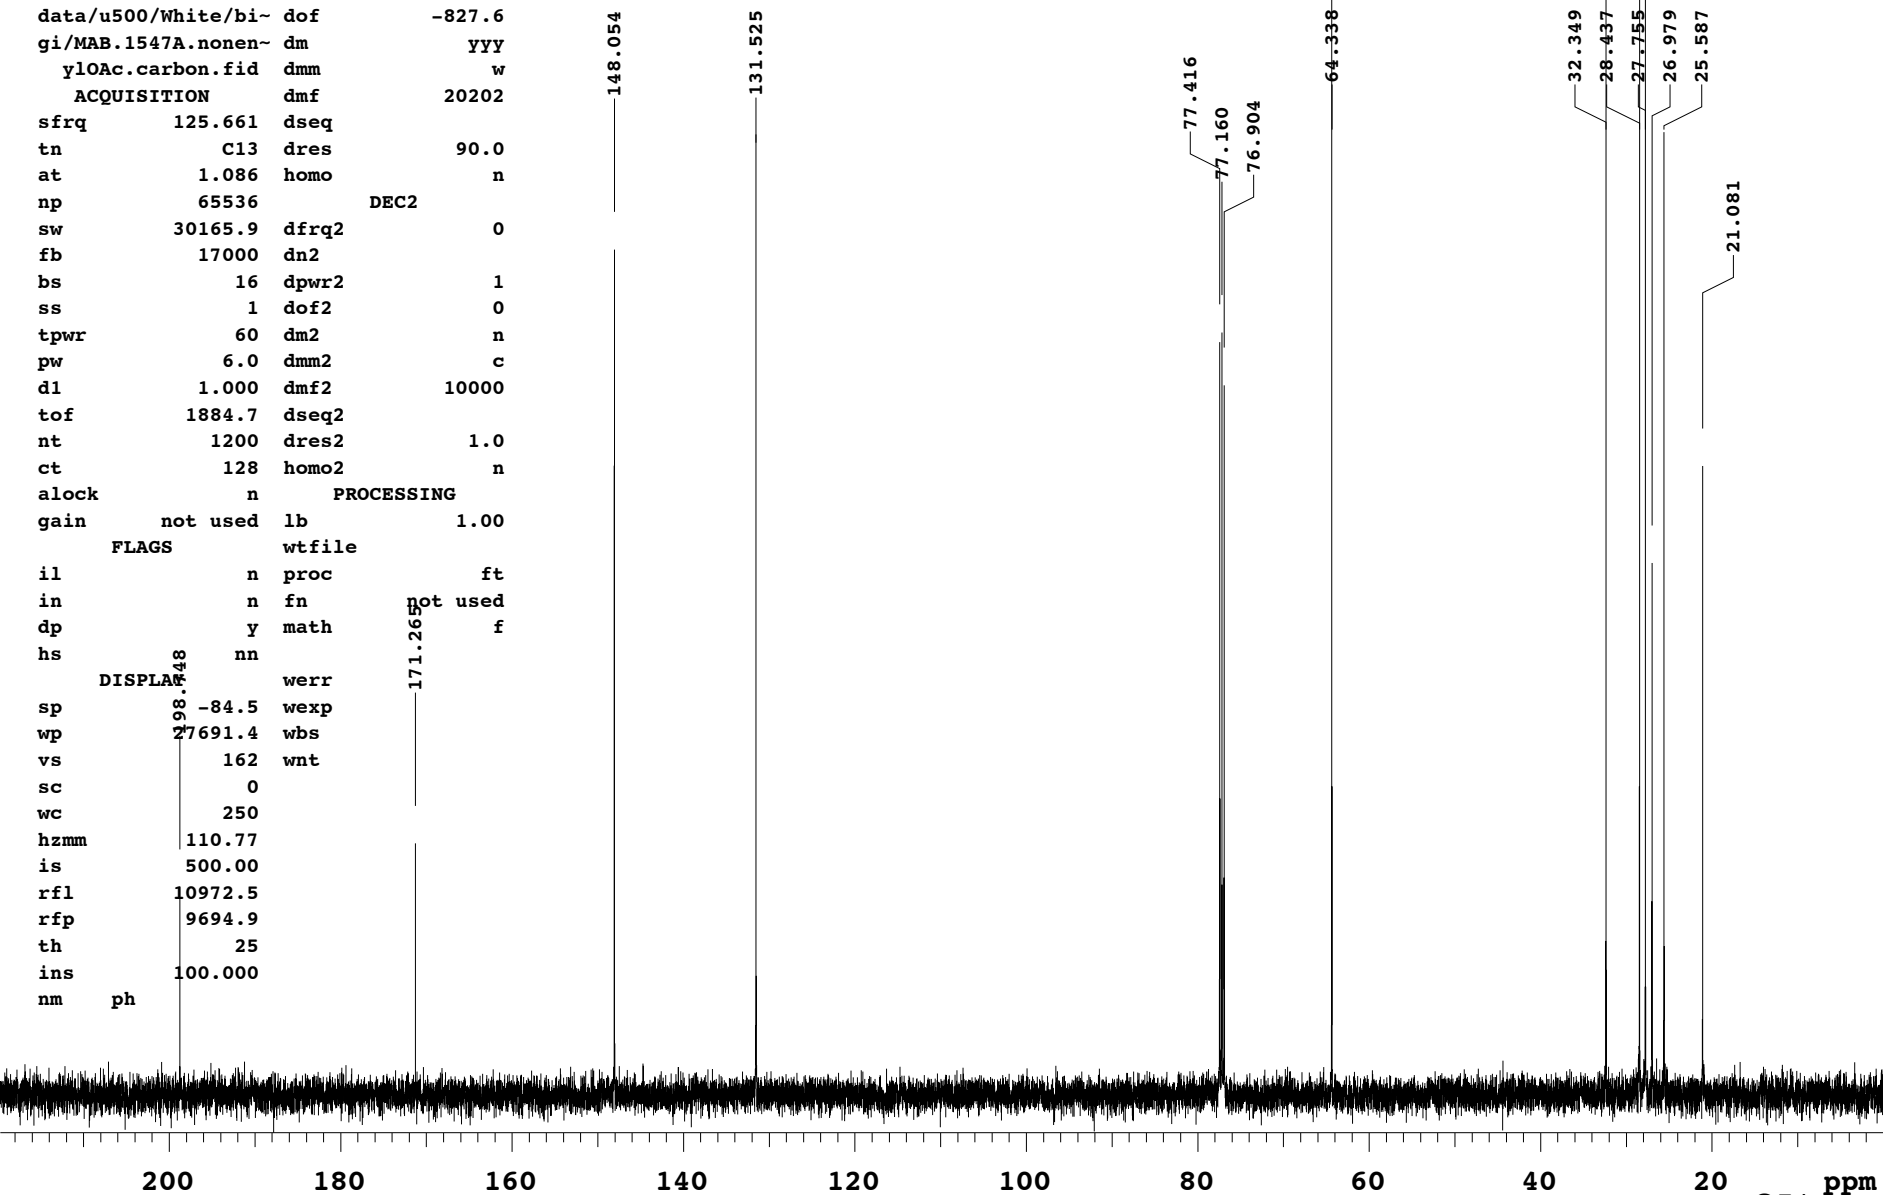

MAB.1453A.phenylbutene.proton

expl s2pul

|                     |                |           |         |
|---------------------|----------------|-----------|---------|
| SAMPLE              |                | DEC. & VT |         |
| date                | Jan 9 2013     | dfrq      | 500.070 |
| solvent             | CDC13          | dn        | H1      |
| file                | /export/home/~ | dpwr      | 18      |
| data/ui500nb/White~ |                | dof       | 0       |
| /bigi/MAB.1453A.ph~ |                | dm        | nnn     |
| enylbutene.proton.~ |                | dmm       | c       |
|                     | fid            | dmf       | 200     |

|             |         |       |     |
|-------------|---------|-------|-----|
| ACQUISITION |         | dseq  |     |
| sfrq        | 500.070 | dres  | 1.0 |
| tn          | H1      | homo  | n   |
| at          | 4.096   | DEC2  |     |
| np          | 65536   | dfrq2 | 0   |
| sw          | 8000.0  | dn2   |     |
| fb          | 4000    | dpwr2 | 1   |
| bs          | 16      | dof2  | 0   |
| tpwr        | 58      | dm2   | n   |
| pw          | 6.5     | dmm2  | c   |
| d1          | 15.000  | dmf2  | 200 |
| tof         | 0       | dseq2 |     |
| nt          | 8       | dres2 | 1.0 |
| ct          | 8       | homo2 | n   |

|            |          |    |      |
|------------|----------|----|------|
| PROCESSING |          | lb |      |
| alock      | n        |    | 0.30 |
| gain       | not used |    |      |

|       |    |        |          |
|-------|----|--------|----------|
| FLAGS |    | wtfile |          |
| il    | n  | proc   | ft       |
| in    | n  | fn     | not used |
| dp    | y  | math   | f        |
| hs    | nn |        |          |

|         |         |      |  |
|---------|---------|------|--|
| DISPLAY |         | werr |  |
| sp      | -995.2  | wexp |  |
| wp      | 6969.0  | wbs  |  |
| vs      | 49      | wnt  |  |
| sc      | 0       |      |  |
| wc      | 250     |      |  |
| hzmm    | 27.88   |      |  |
| is      | 33.57   |      |  |
| rfl     | 5141.1  |      |  |
| rfp     | 3630.5  |      |  |
| th      | 7       |      |  |
| ins     | 100.000 |      |  |
| ai      | ph      |      |  |

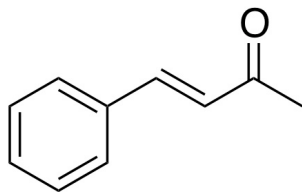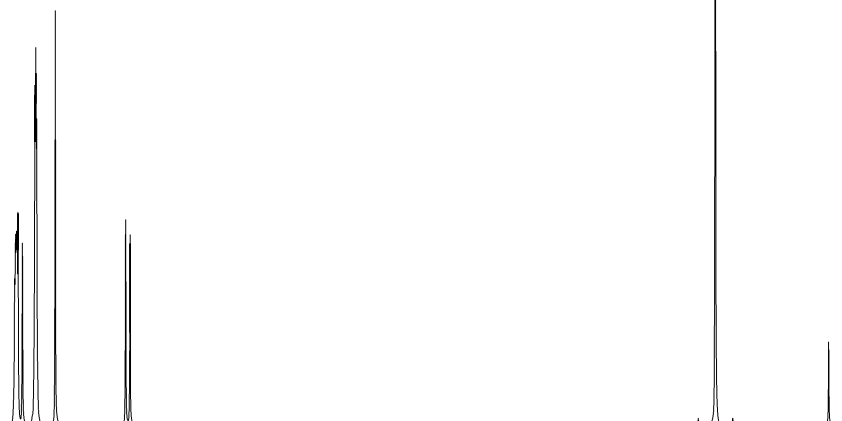

11 10 9 8 7 6 5 4 3 2 1 -0 -1 ppm

expl s2pul

SAMPLE DEC. & VT  
 date Jan 9 2013 dfrq 499.692  
 solvent CDCl3 dn H1  
 file /export/home/~ dpwr 45  
 data/u500/White/bi- dof -827.6  
 gi/MAB.1453A.pheny- dm YYY  
 lbutene.carbon.fid dmm w  
 ACQUISITION dmf 20202

sfrq 125.661 dseq  
 tn C13 dres 90.0  
 at 1.086 homo n  
 np 65536 DEC2  
 sw 30165.9 dfrq2 0  
 fb 17000 dn2  
 bs 16 dpwr2 1  
 ss 1 dof2 0  
 tpwr 60 dm2 n  
 pw 6.0 dmm2 c  
 dl 1.000 dmf2 10000  
 tof 1884.7 dseq2  
 nt 1200 dres2 1.0  
 ct 96 homo2 n

alock n PROCESSING  
 gain not used lb 1.00

FLAGS wtfile  
 il n proc ft  
 in n fn not used  
 dp y math f  
 hs nn

DISPLAY werr  
 sp -1.6 wexp  
 wp 27647.2 wbs  
 vs 162 wnt  
 sc 0  
 wc 250  
 hzmm 10.59  
 is 500.00  
 rfl 10978.0  
 rfp 9694.9  
 th 9  
 ins 100.000  
 nm ph

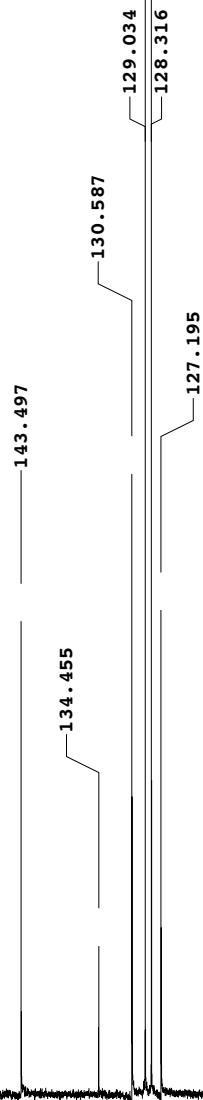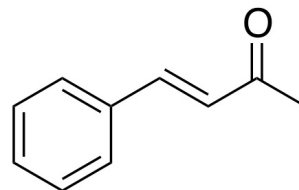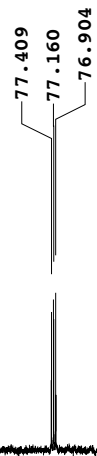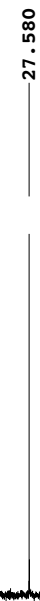

200 180 160 140 120 100 80 60 40 20 ppm

expl s2pul

|                     |                |            |          |
|---------------------|----------------|------------|----------|
| SAMPLE              |                | DEC. & VT  |          |
| date                | Jan 10 2013    | dfrq       | 500.070  |
| solvent             | CDC13          | dn         | H1       |
| file                | /export/home/~ | dpwr       | 18       |
| data/ui500nb/White~ |                | dof        | 0        |
| /bigi/MAB.1460A.me~ |                | dm         | nnn      |
| thoxy.proton.fid    |                | dmm        | c        |
| ACQUISITION         |                | dmf        | 200      |
| sfrq                | 500.070        | dseq       |          |
| tn                  | H1             | dres       | 1.0      |
| at                  | 4.096          | homo       | n        |
| np                  | 65536          | DEC2       |          |
| sw                  | 8000.0         | dfrq2      | 0        |
| fb                  | 4000           | dn2        |          |
| bs                  | 16             | dpwr2      | 1        |
| tpwr                | 58             | dof2       | 0        |
| pw                  | 6.5            | dm2        | n        |
| d1                  | 15.000         | dmm2       | c        |
| tof                 | 0              | dmf2       | 200      |
| nt                  | 8              | dseq2      |          |
| ct                  | 8              | dres2      | 1.0      |
| alock               | n              | homo2      | n        |
| gain                | not used       | PROCESSING |          |
| FLAGS               |                | lb         | 0.30     |
| il                  | n              | wtfile     |          |
| in                  | n              | proc       | ft       |
| dp                  | y              | fn         | not used |
| hs                  | nn             | math       | f        |
| DISPLAY             |                |            |          |
| sp                  | -995.2         | werr       |          |
| wp                  | 6992.4         | wexp       |          |
| vs                  | 31             | wbs        |          |
| sc                  | 0              | wnt        |          |
| wc                  | 250            |            |          |
| hzmm                | 27.97          |            |          |
| is                  | 33.57          |            |          |
| rfl                 | 5141.1         |            |          |
| rfp                 | 3630.5         |            |          |
| th                  | 7              |            |          |
| ins                 | 100.000        |            |          |
| ai                  | ph             |            |          |

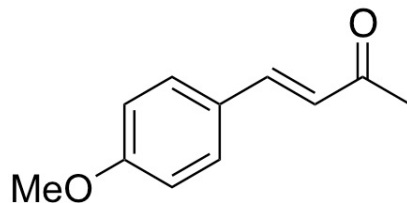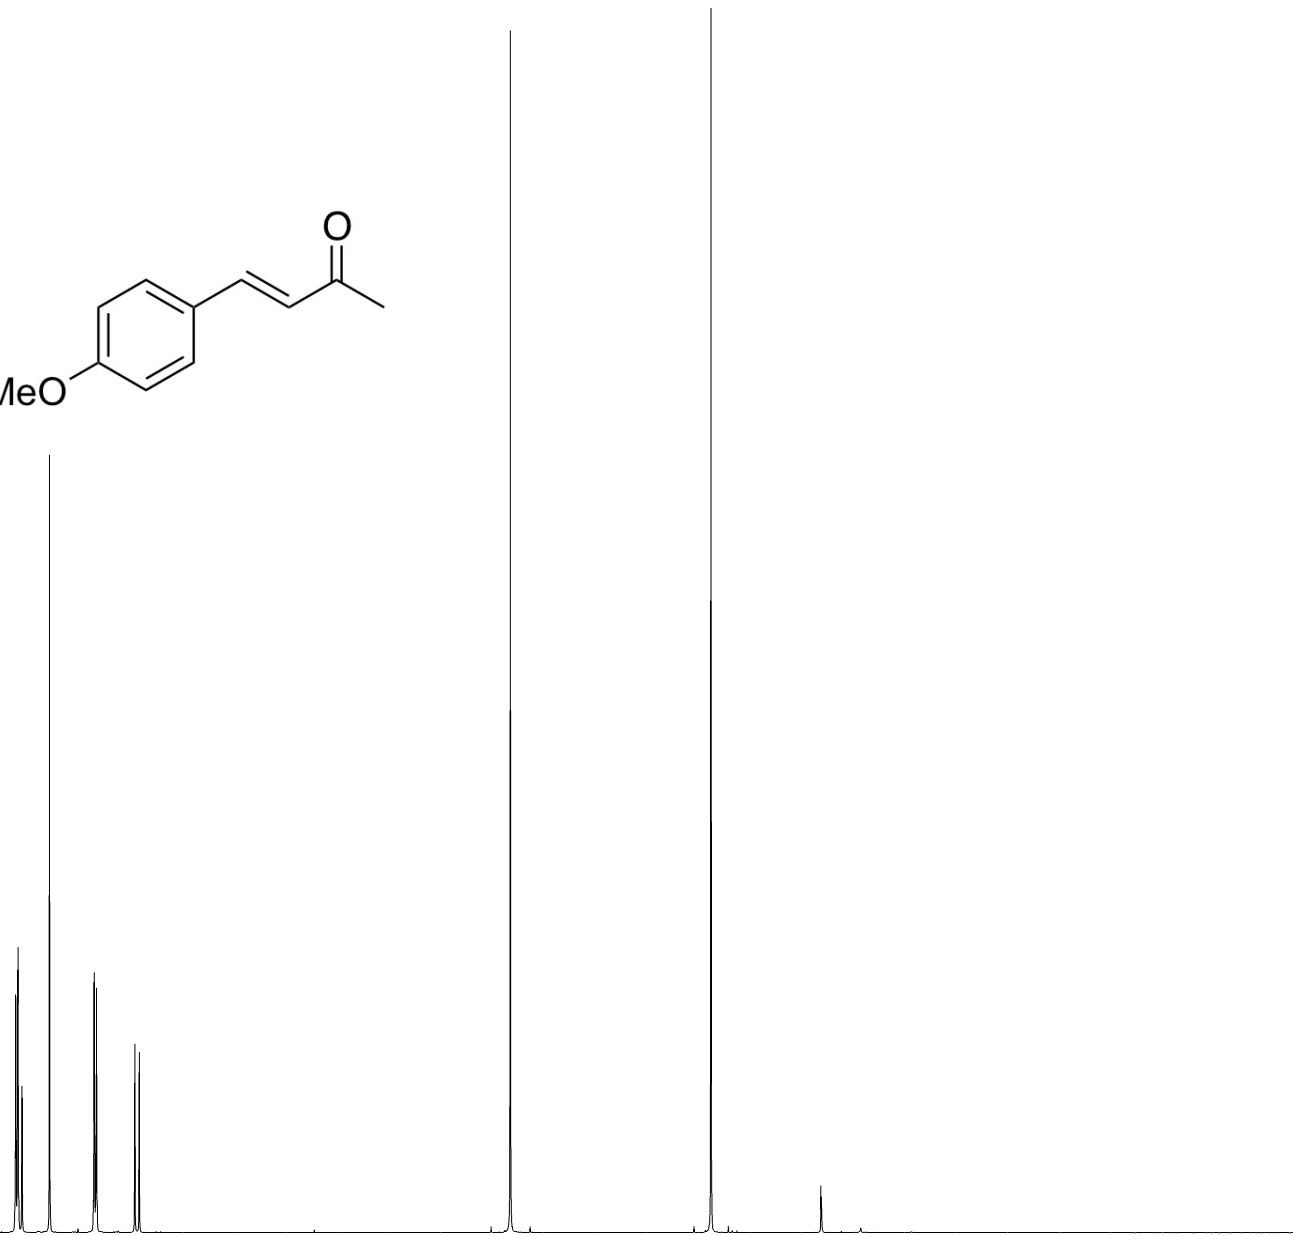

expl s2pul

| SAMPLE              |                | DEC. & VT  |          |
|---------------------|----------------|------------|----------|
| date                | Jan 10 2013    | dfrq       | 499.692  |
| solvent             | CDC13          | dn         | H1       |
| file                | /export/home/~ | dpwr       | 45       |
| data/u500/White/bi- |                | dof        | -827.6   |
| gi/MAB.1460A.metho- |                | dm         | YYY      |
| xy.carbon.fid       |                | dmm        | w        |
| ACQUISITION         |                | dmf        |          |
| sfrq                | 125.661        | dseq       | 20202    |
| tn                  | C13            | dres       | 90.0     |
| at                  | 1.086          | homo       | n        |
| np                  | 65536          | DEC2       |          |
| sw                  | 30165.9        | dfrq2      | 0        |
| fb                  | 17000          | dn2        |          |
| bs                  | 16             | dpwr2      | 1        |
| ss                  | 1              | dof2       | 0        |
| tpwr                | 60             | dm2        | n        |
| pw                  | 6.0            | dmm2       | c        |
| d1                  | 1.000          | dmf2       | 10000    |
| tof                 | 1884.7         | dseq2      |          |
| nt                  | 1200           | dres2      | 1.0      |
| ct                  | 256            | homo2      | n        |
| alock               | n              | PROCESSING |          |
| gain                | not used       | lb         | 1.00     |
| FLAGS               |                | wtfile     |          |
| il                  | n              | proc       | ft       |
| in                  | n              | fn         | not used |
| dp                  | y              | math       | f        |
| hs                  | nn             |            |          |
| DISPLAY             |                | werr       |          |
| sp                  | -34.8          | wexp       |          |
| wp                  | 27735.6        | wbs        |          |
| vs                  | 128            | wnt        |          |
| sc                  | 0              |            |          |
| wc                  | 250            |            |          |
| hzmm                | 10.94          |            |          |
| is                  | 300.00         |            |          |
| rfl                 | 10967.0        |            |          |
| rfp                 | 9694.9         |            |          |
| th                  | 8              |            |          |
| ins                 | 100.000        |            |          |
| nm                  | ph             |            |          |

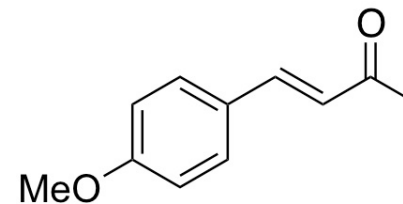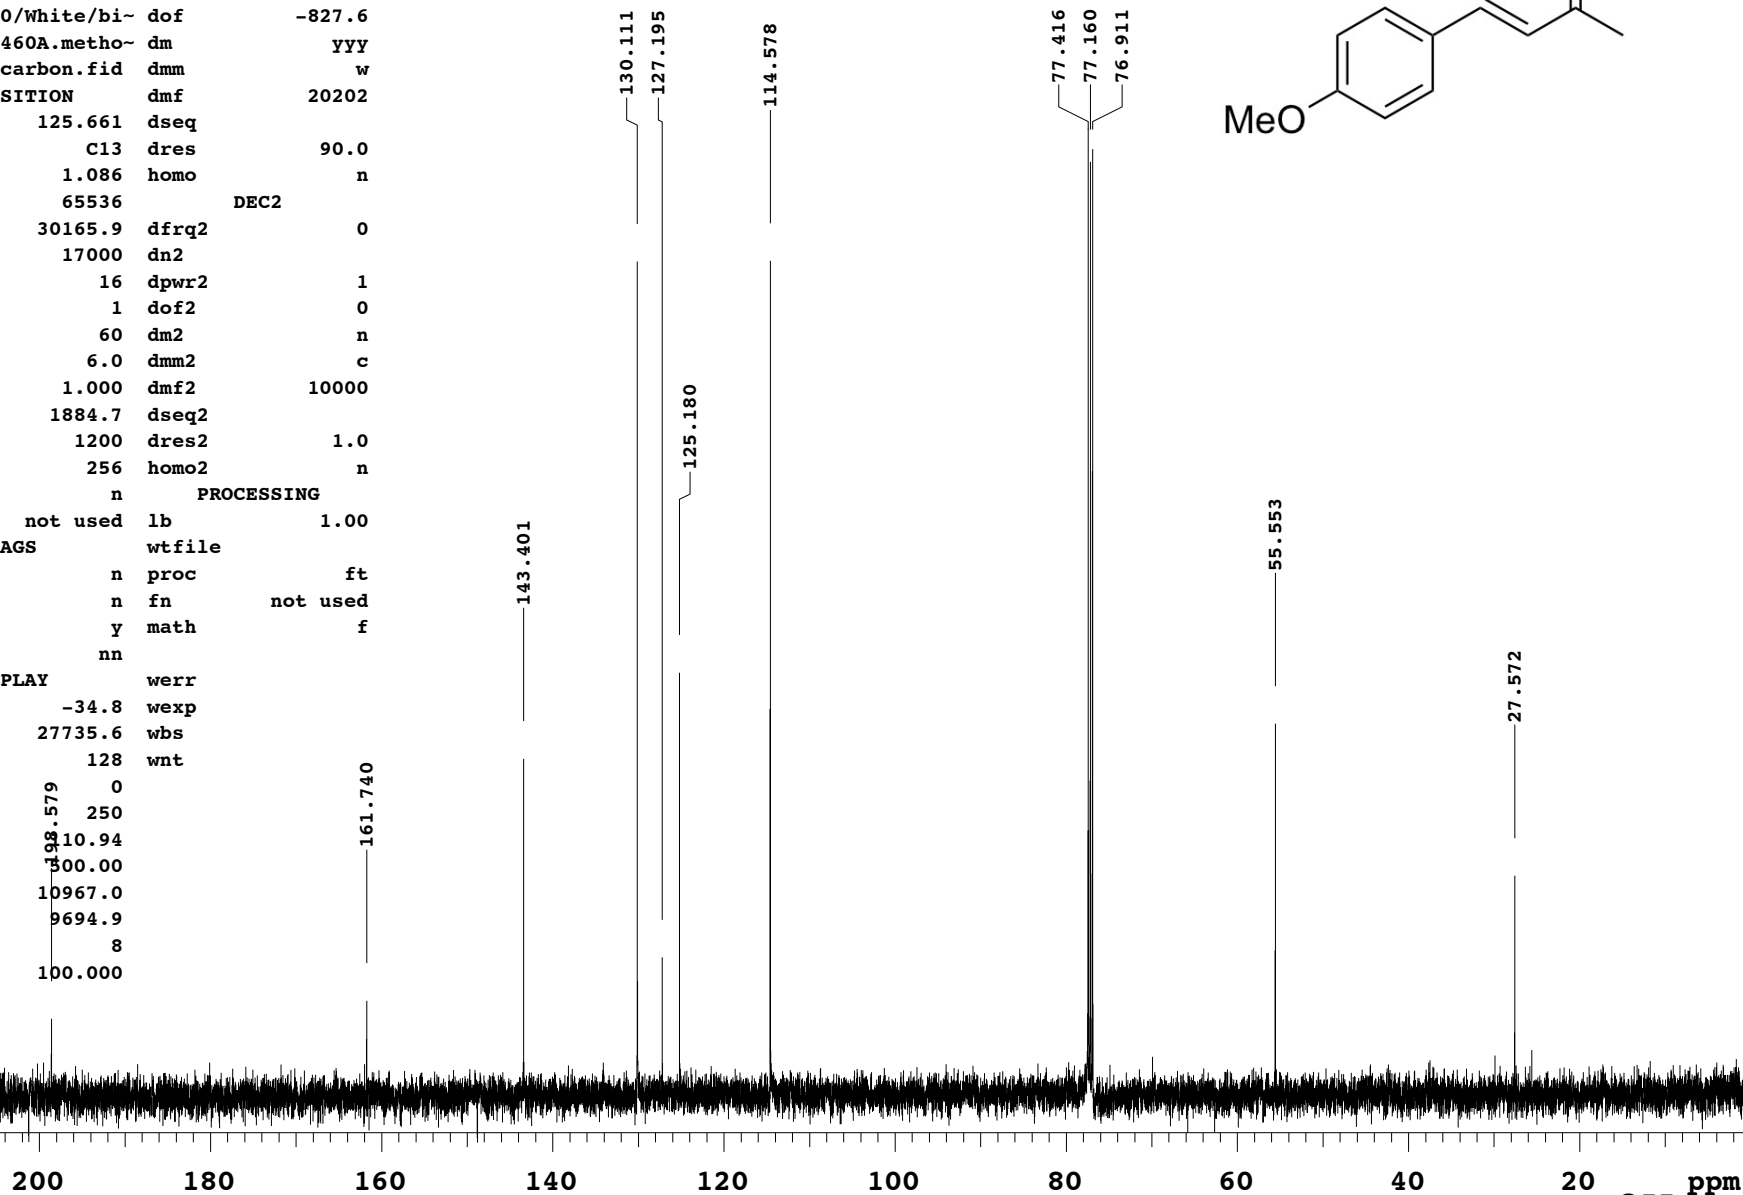

expl s2pul

| SAMPLE              |                | DEC. & VT  |          |
|---------------------|----------------|------------|----------|
| date                | Jan 10 2013    | dfrq       | 500.070  |
| solvent             | CDC13          | dn         | H1       |
| file                | /export/home/~ | dpwr       | 18       |
| data/ui500nb/White~ | dof            |            | 0        |
| /bigi/MAB.1462A.br~ | dm             | nnn        |          |
| omo.proton.fid      | dmm            | c          |          |
| ACQUISITION         |                |            |          |
| sfrq                | 500.070        | dseq       |          |
| tn                  | H1             | dres       | 1.0      |
| at                  | 4.096          | homo       | n        |
| np                  | 65536          | DEC2       |          |
| sw                  | 8000.0         | dfrq2      | 0        |
| fb                  | 4000           | dn2        |          |
| bs                  | 16             | dpwr2      | 1        |
| tpwr                | 58             | dof2       | 0        |
| pw                  | 6.5            | dm2        | n        |
| d1                  | 15.000         | dmm2       | c        |
| tof                 | 0              | dmf2       | 200      |
| nt                  | 8              | dseq2      |          |
| ct                  | 8              | dres2      | 1.0      |
| alock               | n              | homo2      | n        |
| gain                | not used       | PROCESSING |          |
| FLAGS               | lb             |            | 0.30     |
| il                  | n              | wtfile     |          |
| in                  | n              | proc       | ft       |
| dp                  | y              | fn         | not used |
| hs                  | nn             | math       | f        |
| DISPLAY             |                |            |          |
| sp                  | -1019.4        | werr       |          |
| wp                  | 7027.6         | wexp       |          |
| vs                  | 33             | wbs        |          |
| sc                  | 0              | wnt        |          |
| wc                  | 250            |            |          |
| hzmm                | 28.11          |            |          |
| is                  | 33.57          |            |          |
| rfl                 | 5141.8         |            |          |
| rfp                 | 3630.5         |            |          |
| th                  | 7              |            |          |
| ins                 | 100.000        |            |          |
| ai                  | ph             |            |          |

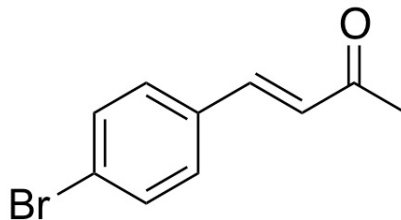

11 10 9 8 7 6 5 4 3 2 1 -0 -1 ppm



expl s2pul

| SAMPLE              |                | DEC. & VT  |          |
|---------------------|----------------|------------|----------|
| date                | Jan 10 2013    | dfrq       | 499.692  |
| solvent             | CDC13          | dn         | H1       |
| file                | /export/home/~ | dpwr       | 45       |
| data/u500/White/bi- | dof            | -827.6     |          |
| gi/MAB.1462A.bromo- | dm             | YYY        |          |
| .carbon.fid         | dmm            | w          |          |
| ACQUISITION         |                | dmf        |          |
| sfrq                | 125.661        | dseq       | 20202    |
| tn                  | C13            | dres       | 90.0     |
| at                  | 1.086          | homo       | n        |
| np                  | 65536          | DEC2       |          |
| sw                  | 30165.9        | dfrq2      | 0        |
| fb                  | 17000          | dn2        |          |
| bs                  | 16             | dpwr2      | 1        |
| ss                  | 1              | dof2       | 0        |
| tpwr                | 60             | dm2        | n        |
| pw                  | 6.0            | dmm2       | c        |
| d1                  | 1.000          | dmf2       | 10000    |
| tof                 | 1884.7         | dseq2      |          |
| nt                  | 1200           | dres2      | 1.0      |
| ct                  | 320            | homo2      | n        |
| alock               | n              | PROCESSING |          |
| gain                | not used       | lb         | 1.00     |
| FLAGS               |                | wtfile     |          |
| il                  | n              | proc       | ft       |
| in                  | n              | fn         | not used |
| dp                  | y              | math       | f        |
| hs                  | nn             |            |          |
| DISPLAY             |                | werr       |          |
| sp                  | -33.9          | wexp       |          |
| wp                  | 27735.6        | wbs        |          |
| vs                  | 162            | wnt        |          |
| sc                  | 0              |            |          |
| wc                  | 250            |            |          |
| hzmm                | 10.94          |            |          |
| is                  | 500.00         |            |          |
| rfl                 | 10966.1        |            |          |
| rfp                 | 9694.9         |            |          |
| th                  | 10             |            |          |
| ins                 | 100.000        |            |          |
| nm                  | ph             |            |          |

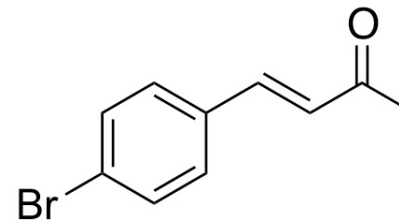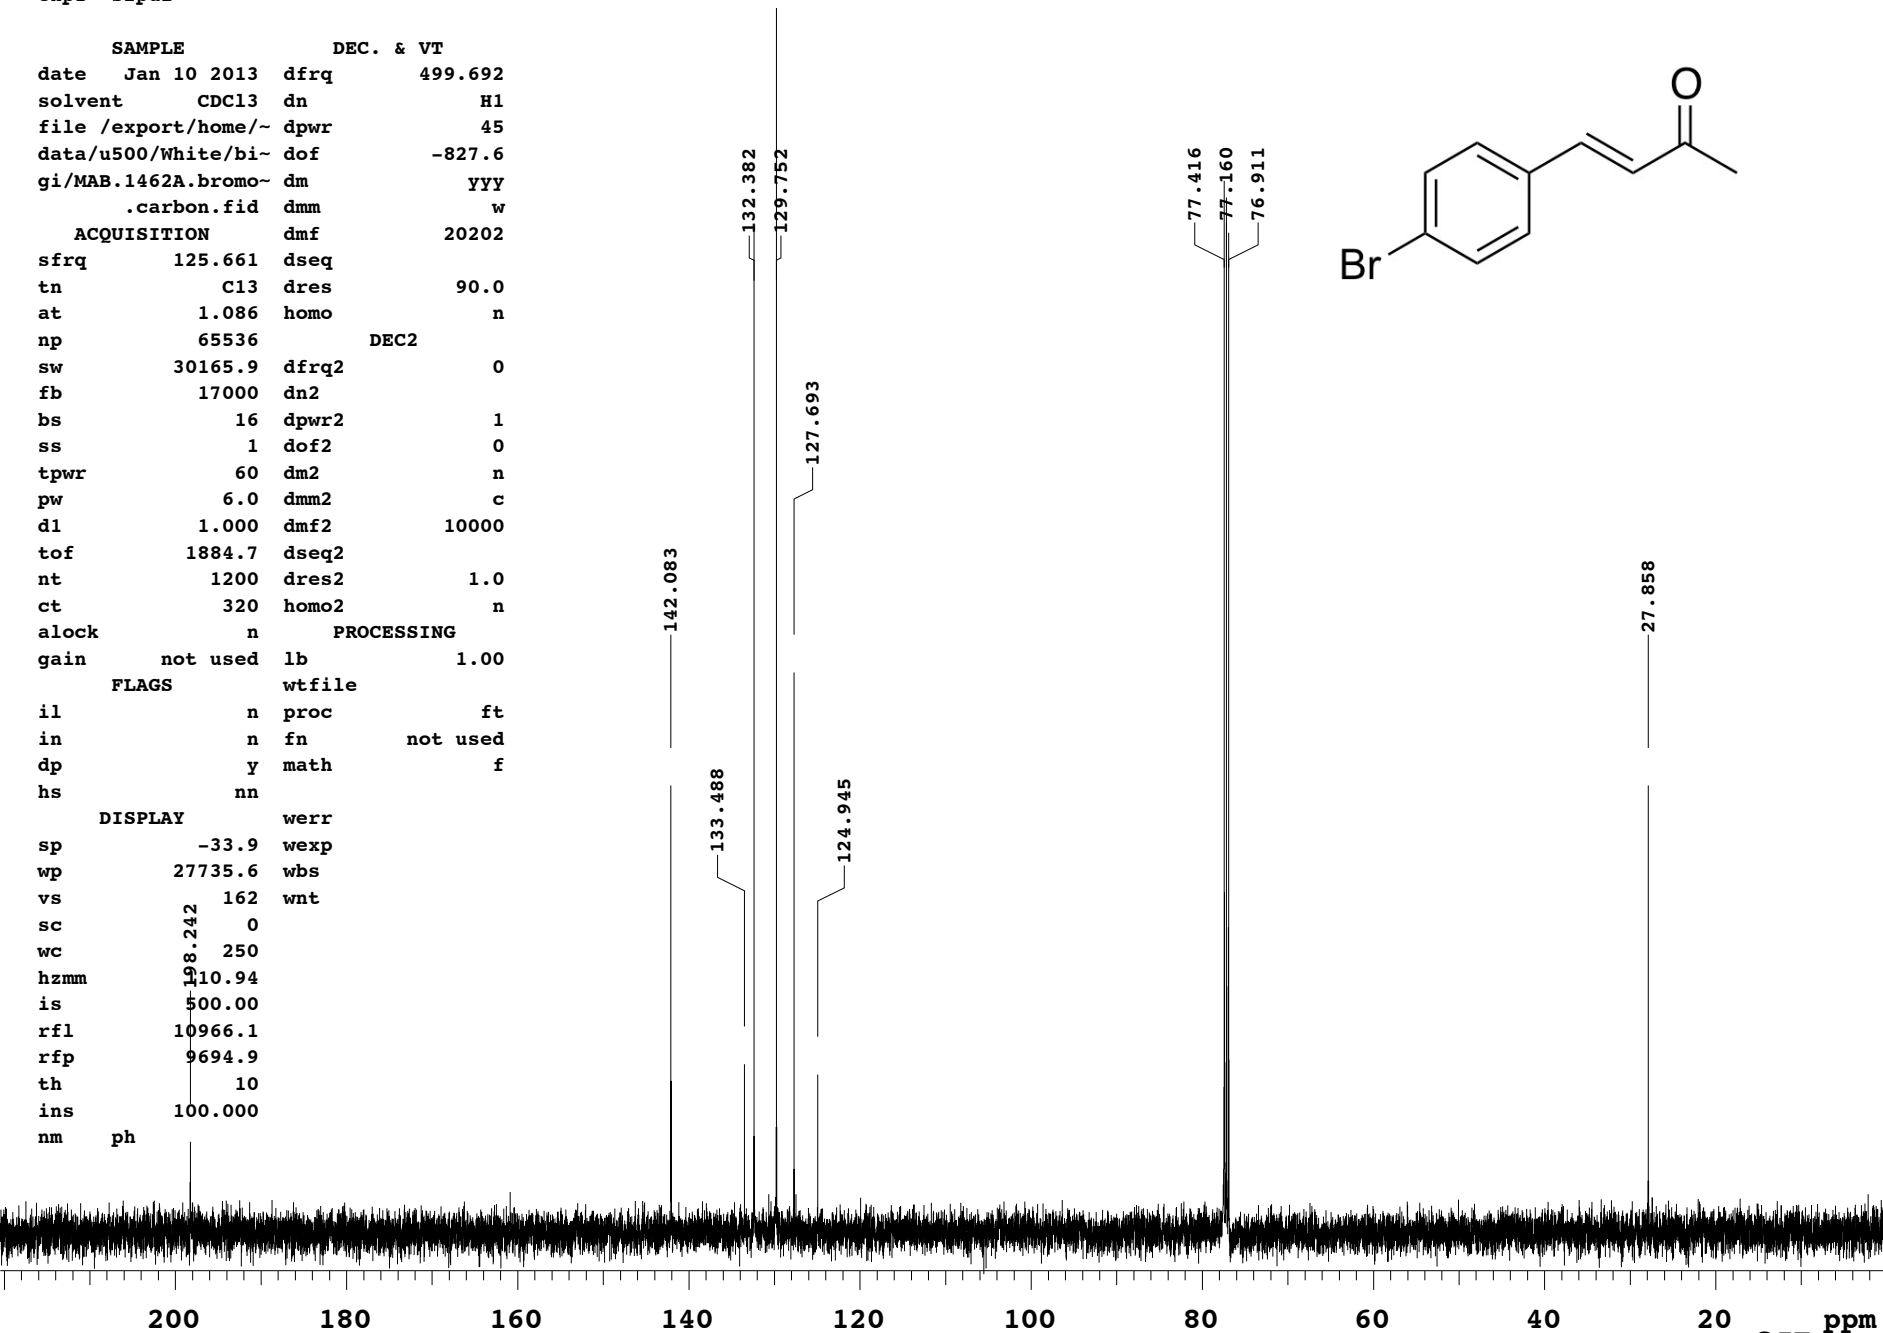

expl s2pul

| SAMPLE              |                | DEC. & VT |         |
|---------------------|----------------|-----------|---------|
| date                | Jan 11 2013    | dfrq      | 499.693 |
| solvent             | CDC13          | dn        | H1      |
| file                | /export/home/~ | dpwr      | 20      |
| data/u500/White/bi~ | dof            |           | 0       |
| gi/MAB.1576A.CF3.p~ | dm             | nnn       |         |
| roton.fid           | dmm            | c         |         |

| ACQUISITION |         |       |     |
|-------------|---------|-------|-----|
| sfrq        | 499.693 | dseq  |     |
| tn          | H1      | dres  | 1.0 |
| at          | 4.665   | homo  | n   |
| np          | 65536   | DEC2  |     |
| sw          | 7024.9  | dfrq2 | 0   |
| fb          | 4000    | dn2   |     |
| bs          | 4       | dpwr2 | 1   |
| tpwr        | 60      | dof2  | 0   |
| pw          | 6.5     | dm2   | n   |
| d1          | 15.000  | dmm2  | c   |
| tof         | 2.0     | dmf2  | 200 |
| nt          | 4       | dseq2 |     |
| ct          | 4       | dres2 | 1.0 |
| alock       | n       | homo2 | n   |

| PROCESSING |          |        |          |
|------------|----------|--------|----------|
| gain       | not used | lb     | 0.30     |
| il         | n        | wtfile |          |
| in         | n        | proc   | ft       |
| dp         | y        | fn     | not used |
| hs         | nn       | math   | f        |

| DISPLAY |         |      |  |
|---------|---------|------|--|
| sp      | -1012.4 | werr |  |
| wp      | 7024.7  | wexp |  |
| vs      | 24      | wbs  |  |
| sc      | 0       | wnt  |  |
| wc      | 250     |      |  |
| hzmm    | 4.57    |      |  |
| is      | 33.57   |      |  |
| rfl     | 4640.3  |      |  |
| rfp     | 3627.8  |      |  |
| th      | 7       |      |  |
| ins     | 100.000 |      |  |
| ai      | ph      |      |  |

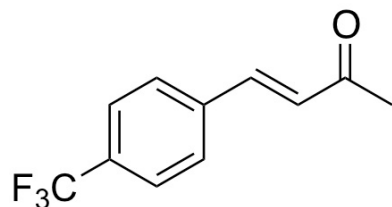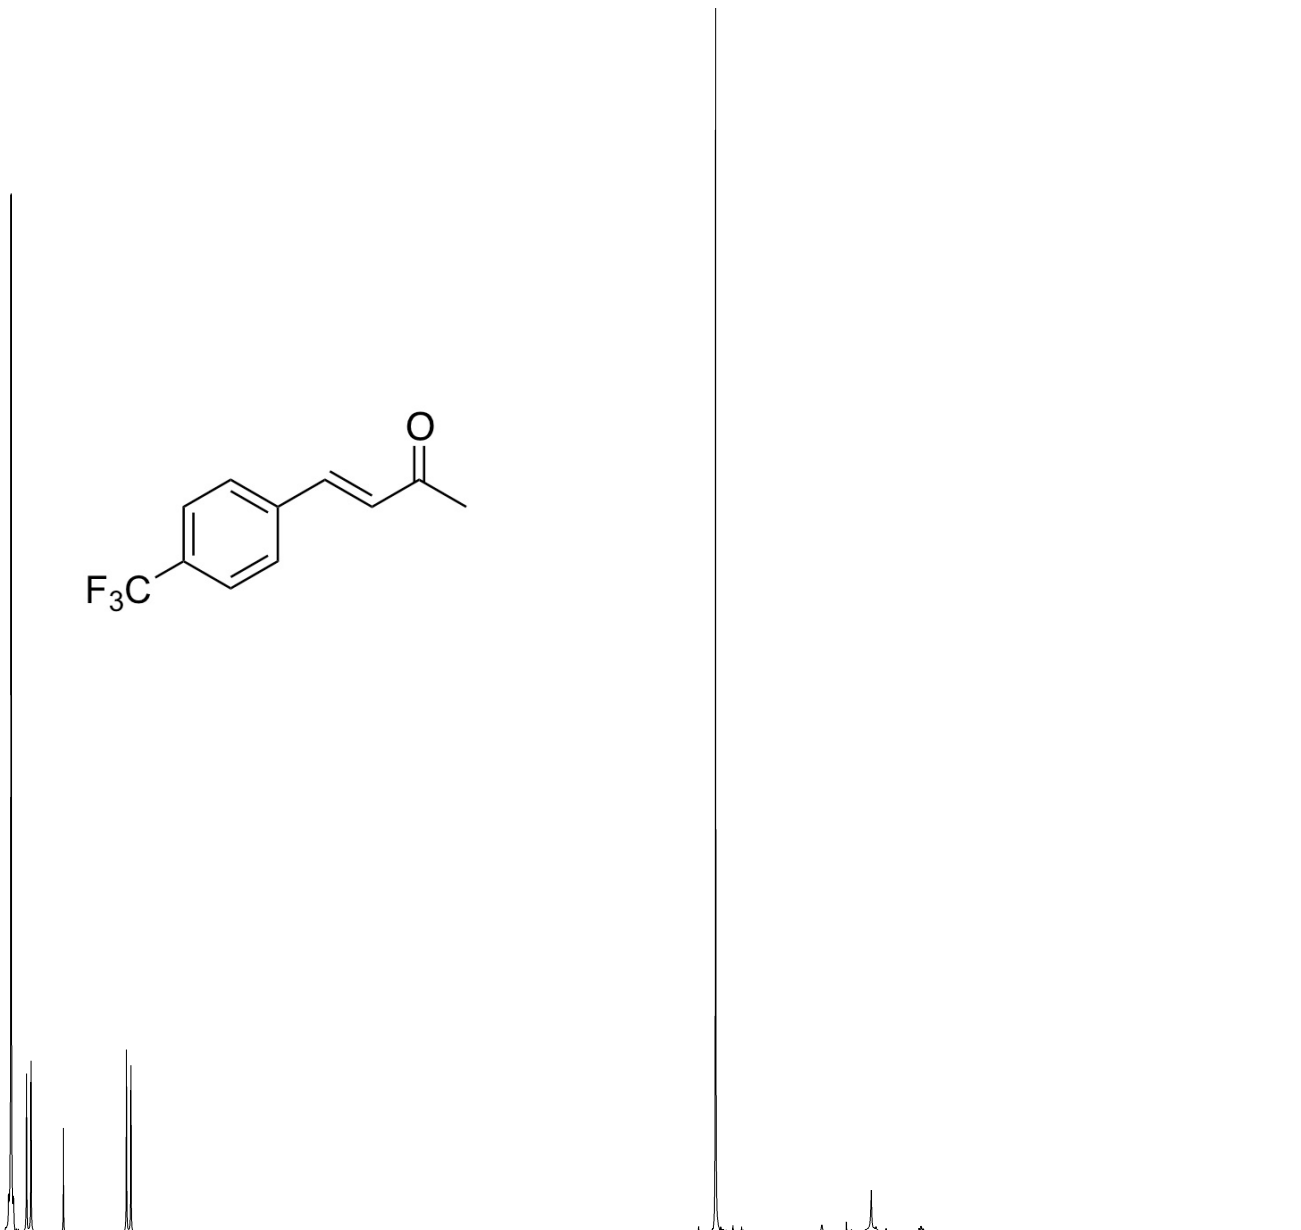

11 10 9 8 7 6 5 4 3 2 1 -0 -1 ppm

S58

expl s2pul

| SAMPLE              |                | DEC. & VT  |          |
|---------------------|----------------|------------|----------|
| date                | Jan 12 2013    | dfrq       | 499.432  |
| solvent             | CDC13          | dn         | H1       |
| file                | /export/home/~ | dpwr       | 47       |
| data/vxr500/White/~ |                | dof        | -827.0   |
| bigi/MAB.1576A.CF3~ |                | dm         | YYY      |
| .carbon.fid         |                | dmm        | w        |
| ACQUISITION         |                | dmf        |          |
| sfrq                | 125.596        | dseq       | 15873    |
| tn                  | C13            | dres       | 1.0      |
| at                  | 1.024          | homo       | n        |
| np                  | 65536          | DEC2       |          |
| sw                  | 32000.0        | dfrq2      | 0        |
| fb                  | 18000          | dn2        |          |
| bs                  | 16             | dpwr2      | 1        |
| ss                  | 1              | dof2       | 0        |
| tpwr                | 63             | dm2        | n        |
| pw                  | 4.5            | dmm2       | c        |
| d1                  | 1.000          | dmf2       | 18519    |
| tof                 | 1880.0         | dseq2      |          |
| nt                  | 12000          | dres2      | 1.0      |
| ct                  | 0              | homo2      | n        |
| alock               | n              | PROCESSING |          |
| gain                | not used       | lb         | 1.00     |
| FLAGS               |                | wtfile     |          |
| il                  | n              | proc       | ft       |
| in                  | n              | fn         | not used |
| dp                  | y              | math       | f        |
| hs                  | nn             |            |          |
| DISPLAY             |                | werr       |          |
| sp                  | 1.4            | wexp       |          |
| wp                  | 27688.5        | wbs        |          |
| vs                  | 197.988        | wnt        |          |
| sc                  | 0              |            |          |
| wc                  | 250            |            |          |
| hzmm                | 110.75         |            |          |
| is                  | 500.00         |            |          |
| rfl                 | 11890.6        |            |          |
| rfp                 | 9689.9         |            |          |
| th                  | 4              |            |          |
| ins                 | 100.000        |            |          |
| nm                  | ph             |            |          |

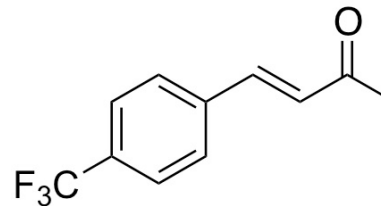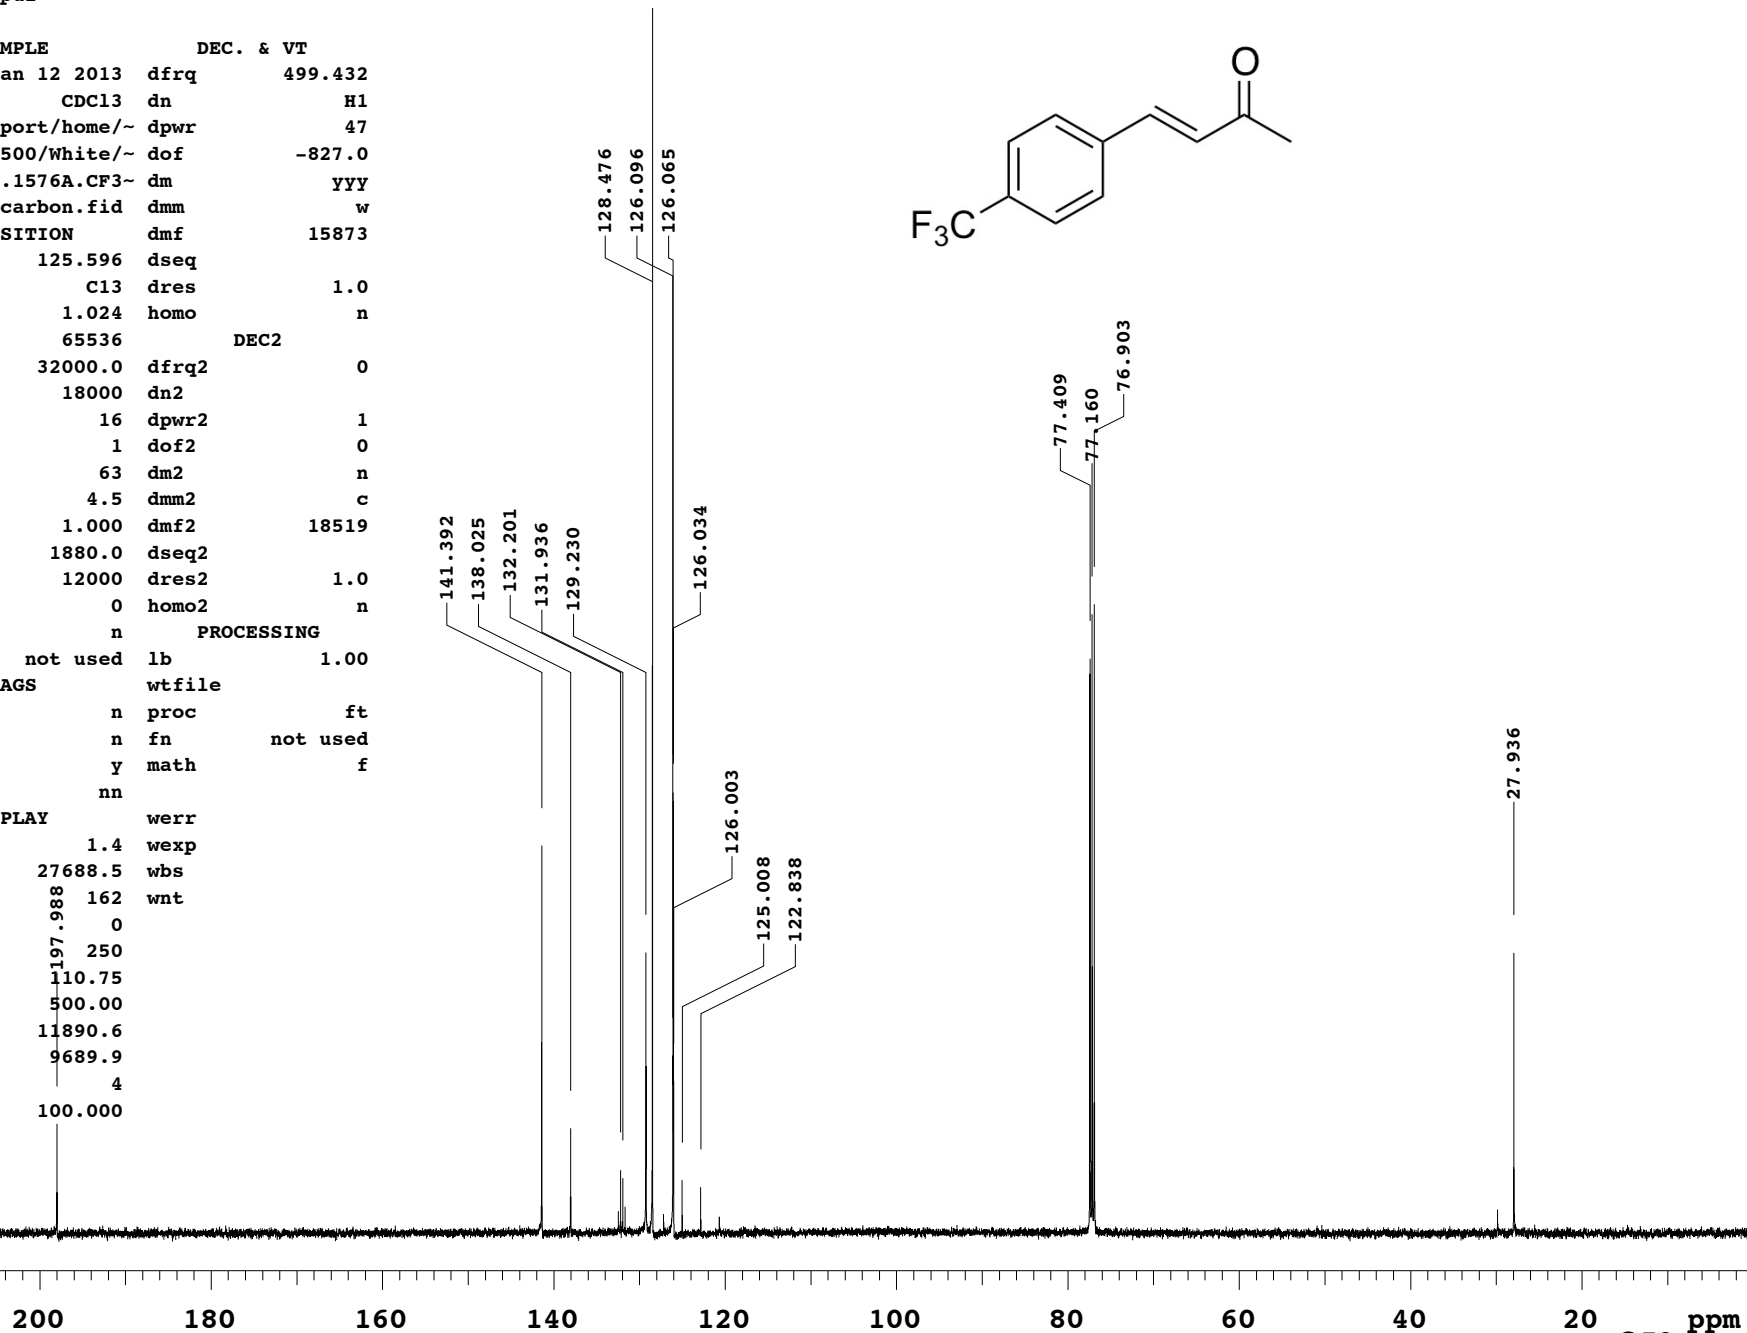

expl s2pul

| SAMPLE              |                | DEC. & VT |         |
|---------------------|----------------|-----------|---------|
| date                | Jan 14 2013    | dfrq      | 500.070 |
| solvent             | CDC13          | dn        | H1      |
| file                | /export/home/~ | dpwr      | 18      |
| data/ui500nb/White~ |                | dof       | 0       |
| /bigi/MAB.1553A.be~ |                | dm        | nnn     |
| nzopyran.proton.fi~ |                | dmm       | c       |
|                     |                | d         | dmf     |
|                     |                |           | 200     |

| ACQUISITION |         |       |     |
|-------------|---------|-------|-----|
| sfrq        | 500.070 | dres  | 1.0 |
| tn          | H1      | homo  | n   |
| at          | 4.096   | DEC2  |     |
| np          | 65536   | dfrq2 | 0   |
| sw          | 8000.0  | dn2   |     |
| fb          | 4000    | dpwr2 | 1   |
| bs          | 16      | dof2  | 0   |
| tpwr        | 58      | dm2   | n   |
| pw          | 6.5     | dmm2  | c   |
| d1          | 15.000  | dmf2  | 200 |
| tof         | 0       | dseq2 |     |
| nt          | 8       | dres2 | 1.0 |
| ct          | 8       | homo2 | n   |

| PROCESSING |          |    |      |
|------------|----------|----|------|
| alock      | n        | lb | 0.30 |
| gain       | not used |    |      |

| FLAGS |    |      |          |
|-------|----|------|----------|
| il    | n  | proc | ft       |
| in    | n  | fn   | not used |
| dp    | y  | math | f        |
| hs    | nn |      |          |

| DISPLAY |         |      |  |
|---------|---------|------|--|
| sp      | -972.0  | wexp |  |
| wp      | 6957.3  | wbs  |  |
| vs      | 24      | wnt  |  |
| sc      | 0       |      |  |
| wc      | 250     |      |  |
| hzmm    | 27.83   |      |  |
| is      | 33.57   |      |  |
| rfl     | 1510.9  |      |  |
| rfp     | 0       |      |  |
| th      | 7       |      |  |
| ins     | 100.000 |      |  |
| ai      | ph      |      |  |

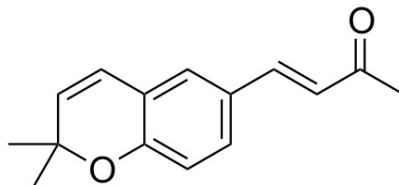

11 10 9 8 7 6 5 4 3 2 1 -0 -1 ppm

S60

expl s2pul

| SAMPLE              |                | DEC. & VT  |          |
|---------------------|----------------|------------|----------|
| date                | Jan 14 2013    | dfrq       | 499.692  |
| solvent             | CDCl3          | dn         | H1       |
| file                | /export/home/~ | dpwr       | 45       |
| data/u500/White/bi- | dof            | -827.6     |          |
| gi/MAB.1553A.benzo- | dm             | YYY        |          |
| pyran.carbon.fid    | dmm            | w          |          |
| ACQUISITION         |                | dmf        |          |
| sfrq                | 125.661        | dseq       |          |
| tn                  | C13            | dres       | 90.0     |
| at                  | 1.086          | homo       | n        |
| np                  | 65536          | DEC2       |          |
| sw                  | 30165.9        | dfrq2      | 0        |
| fb                  | 17000          | dn2        |          |
| bs                  | 16             | dpwr2      | 1        |
| ss                  | 1              | dof2       | 0        |
| tpwr                | 60             | dm2        | n        |
| pw                  | 6.0            | dmm2       | c        |
| d1                  | 1.000          | dmf2       | 10000    |
| tof                 | 1884.7         | dseq2      |          |
| nt                  | 1200           | dres2      | 1.0      |
| ct                  | 192            | homo2      | n        |
| alock               | n              | PROCESSING |          |
| gain                | not used       | lb         | 1.00     |
| FLAGS               |                | wtfile     |          |
| il                  | n              | proc       | ft       |
| in                  | n              | fn         | not used |
| dp                  | y              | math       | f        |
| hs                  | nn             |            |          |
| DISPLAY             |                | werr       |          |
| sp                  | 7.6            | wexp       |          |
| wp                  | 647.2          | wbs        |          |
| vs                  | 162            | wnt        |          |
| sc                  | 0              |            |          |
| wc                  | 250            |            |          |
| hzmm                | 110.59         |            |          |
| is                  | 500.00         |            |          |
| rfl                 | 10968.8        |            |          |
| rfp                 | 9694.9         |            |          |
| th                  | 13             |            |          |
| ins                 | 100.000        |            |          |
| nm                  | ph             |            |          |

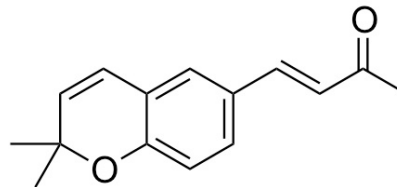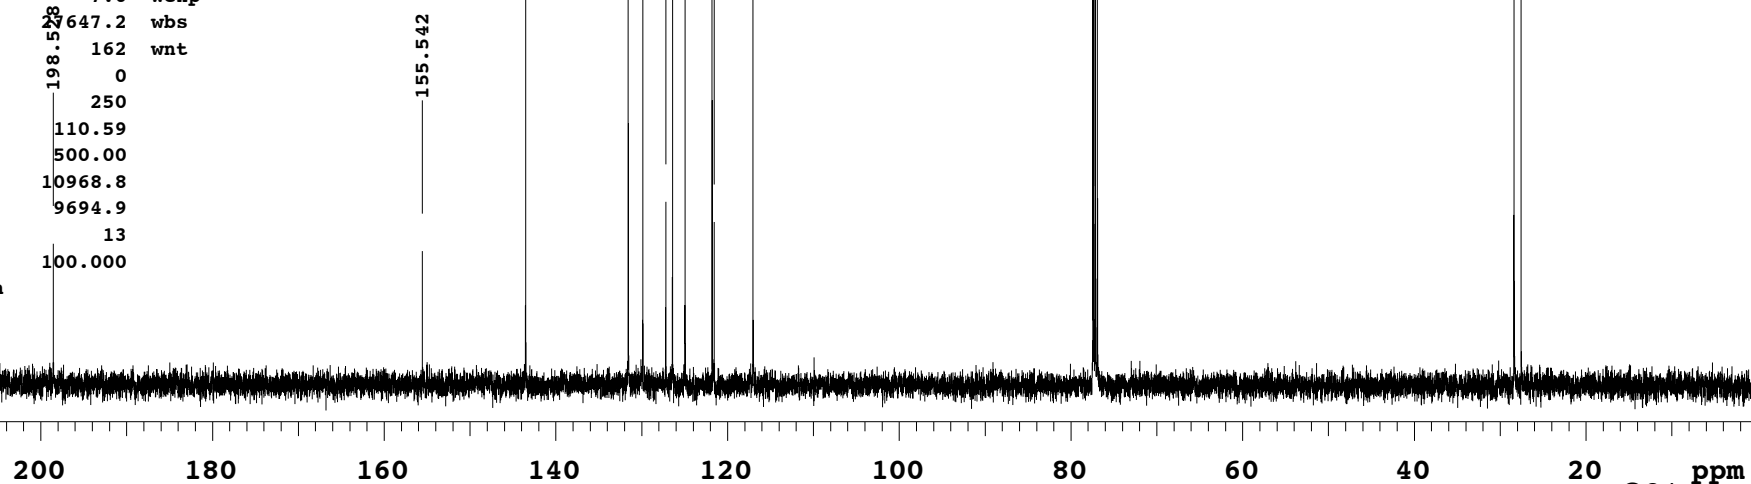

expl s2pul

| SAMPLE              |                | DEC. & VT |         |
|---------------------|----------------|-----------|---------|
| date                | Jan 14 2013    | dfrq      | 500.070 |
| solvent             | CDC13          | dn        | H1      |
| file                | /export/home/~ | dpwr      | 18      |
| data/ui500nb/White~ |                | dof       | 0       |
| /bigi/MAB.1513A.or~ |                | dm        | nnn     |
| thoMe.proton.fid    |                | dmm       | c       |

| ACQUISITION |         |       |     |
|-------------|---------|-------|-----|
| sfrq        | 500.070 | dseq  |     |
| tn          | H1      | dres  | 1.0 |
| at          | 4.096   | homo  | n   |
| np          | 65536   | DEC2  |     |
| sw          | 8000.0  | dfrq2 | 0   |
| fb          | 4000    | dn2   |     |
| bs          | 16      | dpwr2 | 1   |
| tpwr        | 58      | dof2  | 0   |
| pw          | 6.5     | dm2   | n   |
| d1          | 15.000  | dmm2  | c   |
| tof         | 0       | dmf2  | 200 |
| nt          | 4       | dseq2 |     |
| ct          | 4       | dres2 | 1.0 |
| alock       | n       | homo2 | n   |

| PROCESSING |          |        |          |
|------------|----------|--------|----------|
| gain       | not used | lb     | 0.30     |
| il         | n        | wtfile |          |
| in         | n        | proc   | ft       |
| dp         | y        | fn     | not used |
| hs         | nn       | math   | f        |

| DISPLAY |         |      |  |
|---------|---------|------|--|
| sp      | -1000.9 | werr |  |
| wp      | 7004.2  | wexp |  |
| vs      | 44      | wbs  |  |
| sc      | 0       | wnt  |  |
| wc      | 250     |      |  |
| hzmm    | 28.02   |      |  |
| is      | 33.57   |      |  |
| rfl     | 5123.3  |      |  |
| rfp     | 3630.5  |      |  |
| th      | 7       |      |  |
| ins     | 100.000 |      |  |
| ai      | ph      |      |  |

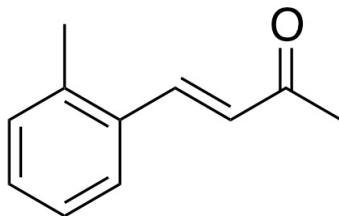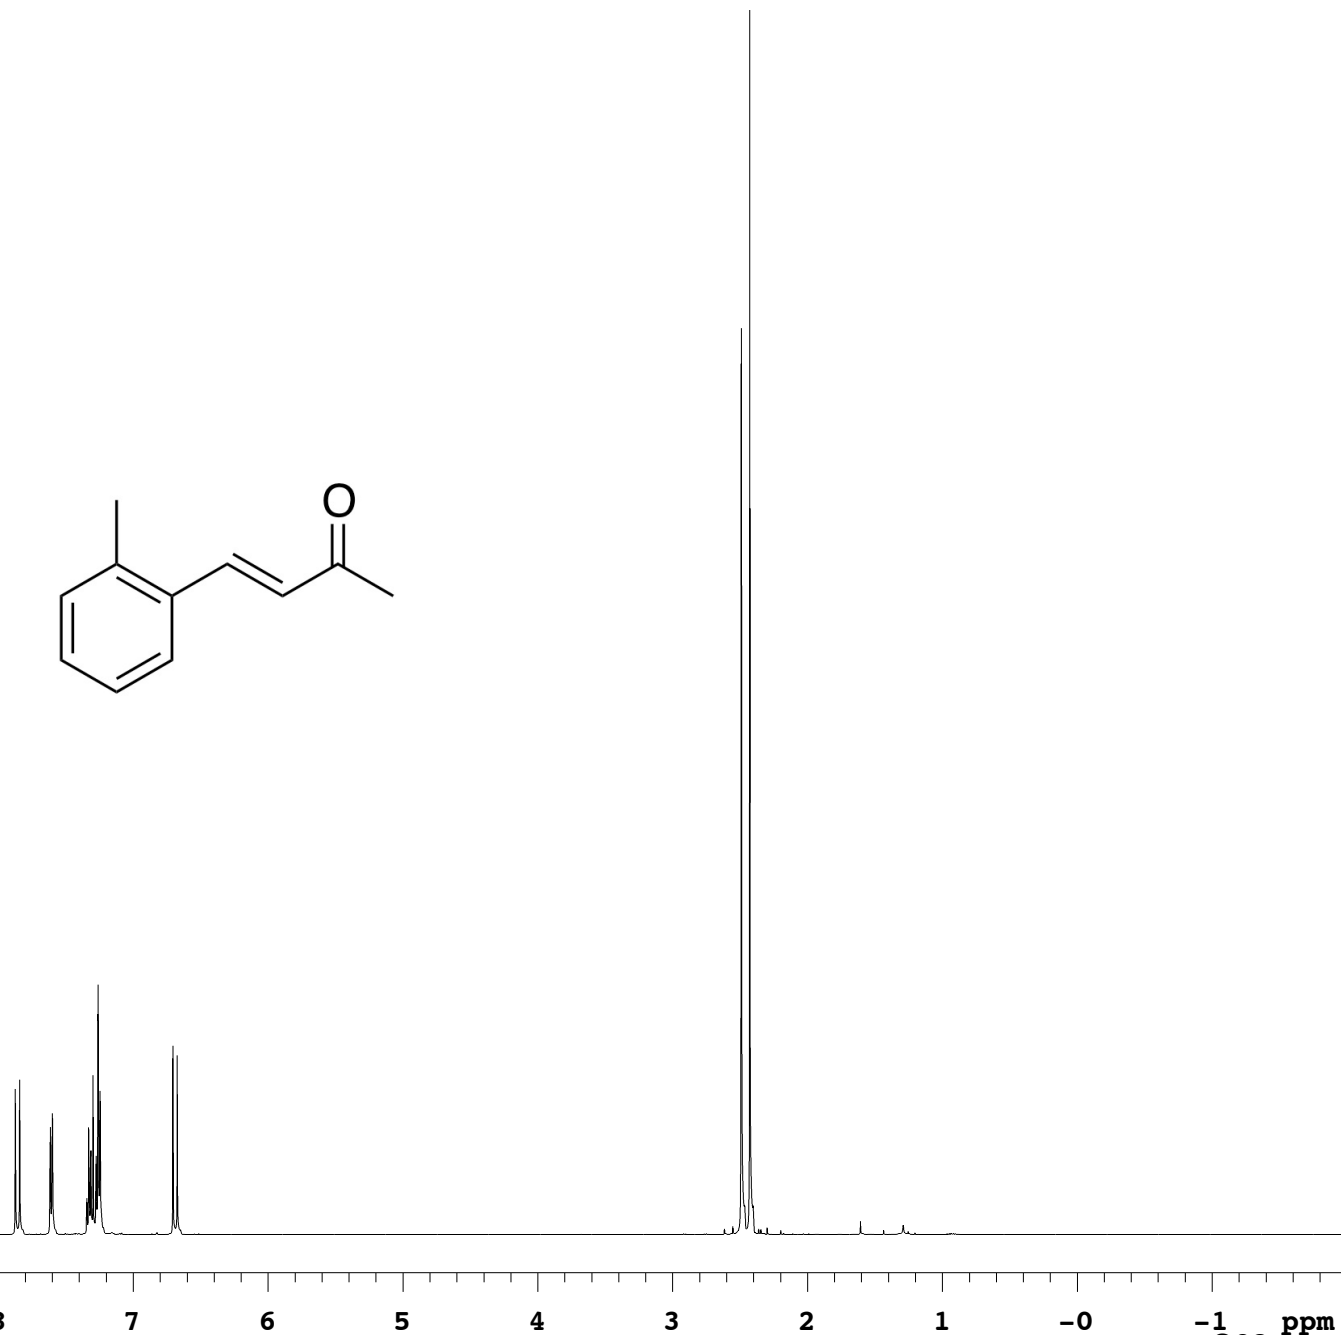

11 10 9 8 7 6 5 4 3 2 1 -0 -1 ppm

expl s2pul

| SAMPLE              |                | DEC. & VT  |          |
|---------------------|----------------|------------|----------|
| date                | Jan 14 2013    | dfrq       | 499.432  |
| solvent             | CDC13          | dn         | H1       |
| file                | /export/home/~ | dpwr       | 47       |
| data/vxr500/White/~ | dof            | -827.0     |          |
| bigi/MAB.1513A.ort- | dm             | YYY        |          |
| hoMe.carbon.fid     | dmm            | w          |          |
| ACQUISITION         |                |            |          |
| sfrq                | 125.596        | dseq       |          |
| tn                  | C13            | dres       | 1.0      |
| at                  | 1.024          | homo       | n        |
| np                  | 65536          | DEC2       |          |
| sw                  | 32000.0        | dfrq2      | 0        |
| fb                  | 18000          | dn2        |          |
| bs                  | 16             | dpwr2      | 1        |
| ss                  | 1              | dof2       | 0        |
| tpwr                | 63             | dm2        | n        |
| pw                  | 4.5            | dmm2       | c        |
| d1                  | 1.000          | dmf2       | 18519    |
| tof                 | 1880.0         | dseq2      |          |
| nt                  | 1200           | dres2      | 1.0      |
| ct                  | 128            | homo2      | n        |
| alock               | n              | PROCESSING |          |
| gain                | not used       | lb         | 1.00     |
| FLAGS               |                | wtfile     |          |
| il                  | n              | proc       | ft       |
| in                  | n              | fn         | not used |
| dp                  | y              | math       | f        |
| hs                  | nn             |            |          |
| DISPLAY             |                | werr       |          |
| sp                  | 194.9          | wexp       |          |
| wp                  | 27829.1        | wbs        |          |
| vs                  | 162            | wnt        |          |
| sc                  | 0              |            |          |
| wc                  | 250            |            |          |
| hzmm                | 111.32         |            |          |
| is                  | 500.00         |            |          |
| rfl                 | 11899.4        |            |          |
| rfp                 | 9689.9         |            |          |
| th                  | 16             |            |          |
| ins                 | 100.000        |            |          |
| nm                  | ph             |            |          |

140.887  
137.916  
133.437  
130.941  
130.296  
128.165  
126.508  
126.470

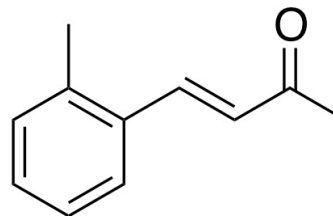

77.409  
77.152  
76.896

27.858

19.833

200 180 160 140 120 100 80 60 40 20 ppm

expl s2pul

| SAMPLE              |                | DEC. & VT  |          |
|---------------------|----------------|------------|----------|
| date                | Jan 9 2013     | dfrq       | 500.070  |
| solvent             | CDC13          | dn         | H1       |
| file                | /export/home/~ | dpwr       | 18       |
| data/ui500nb/White~ |                | dof        | 0        |
| /bigi/MAB.1443A.de- |                | dm         | nnn      |
| cene.proton.fid     |                | dmm        | c        |
| ACQUISITION         |                | dmf        |          |
| sfrq                | 500.070        | dseq       | 200      |
| tn                  | H1             | dres       | 1.0      |
| at                  | 4.096          | homo       | n        |
| np                  | 65536          | DEC2       |          |
| sw                  | 8000.0         | dfrq2      | 0        |
| fb                  | 4000           | dn2        |          |
| bs                  | 16             | dpwr2      | 1        |
| tpwr                | 58             | dof2       | 0        |
| pw                  | 6.5            | dm2        | n        |
| d1                  | 15.000         | dmm2       | c        |
| tof                 | 0              | dof2       | 200      |
| nt                  | 8              | dseq2      |          |
| ct                  | 8              | dres2      | 1.0      |
| alock               | n              | homo2      | n        |
| gain                | not used       | PROCESSING |          |
| FLAGS               | lb             |            | 0.30     |
| il                  | n              | wtfile     |          |
| in                  | n              | proc       | ft       |
| dp                  | y              | fn         | not used |
| hs                  | nn             | math       | f        |
| DISPLAY             |                |            |          |
| sp                  | -995.5         | werr       |          |
| wp                  | 6992.4         | wexp       |          |
| vs                  | 44             | wbs        |          |
| sc                  | 0              | wnt        |          |
| wc                  | 250            |            |          |
| hzmm                | 27.97          |            |          |
| is                  | 33.57          |            |          |
| rfl                 | 1510.9         |            |          |
| rfp                 | 0              |            |          |
| th                  | 7              |            |          |
| ins                 | 100.000        |            |          |
| ai                  | ph             |            |          |

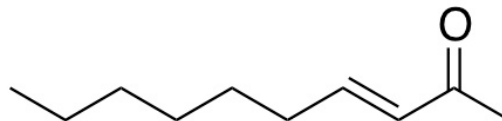

11 10 9 8 7 6 5 4 3 2 1 -0 -1 ppm

S64



expl s2pul

|                     |                |            |          |
|---------------------|----------------|------------|----------|
| SAMPLE              |                | DEC. & VT  |          |
| date                | Jan 9 2013     | dfrq       | 499.692  |
| solvent             | CDC13          | dn         | H1       |
| file                | /export/home/~ | dpwr       | 45       |
| data/u500/White/bi- | dof            | -827.6     |          |
| gi/MAB.1443A.decen- | dm             | YYY        |          |
| e.carbon.fid        | dmm            | w          |          |
| ACQUISITION         |                | dmf        | 20202    |
| sfrq                | 125.661        | dseq       |          |
| tn                  | C13            | dres       | 90.0     |
| at                  | 1.086          | homo       | n        |
| np                  | 65536          | DEC2       |          |
| sw                  | 30165.9        | dfrq2      | 0        |
| fb                  | 17000          | dn2        |          |
| bs                  | 16             | dpwr2      | 1        |
| ss                  | 1              | dof2       | 0        |
| tpwr                | 60             | dm2        | n        |
| pw                  | 6.0            | dmm2       | c        |
| d1                  | 1.000          | dmf2       | 10000    |
| tof                 | 1884.7         | dseq2      |          |
| nt                  | 1200           | dres2      | 1.0      |
| ct                  | 144            | homo2      | n        |
| alock               | n              | PROCESSING |          |
| gain                | not used       | lb         | 1.00     |
| FLAGS               |                | wtfile     |          |
| il                  | n              | proc       | ft       |
| in                  | n              | fn         | not used |
| dp                  | y              | math       | f        |
| hs                  | nn             |            |          |
| DISPLAY             |                | werr       |          |
| sp                  | 50.8           | wexp       |          |
| wp                  | 28779.7        | wbs        |          |
| vs                  | 162            | wnt        |          |
| sc                  | 0              |            |          |
| wc                  | 250            |            |          |
| hzmm                | 111.12         |            |          |
| is                  | 500.00         |            |          |
| rfl                 | 10969.8        |            |          |
| rfp                 | 9694.9         |            |          |
| th                  | 16             |            |          |
| ins                 | 100.000        |            |          |
| nm                  | ph             |            |          |

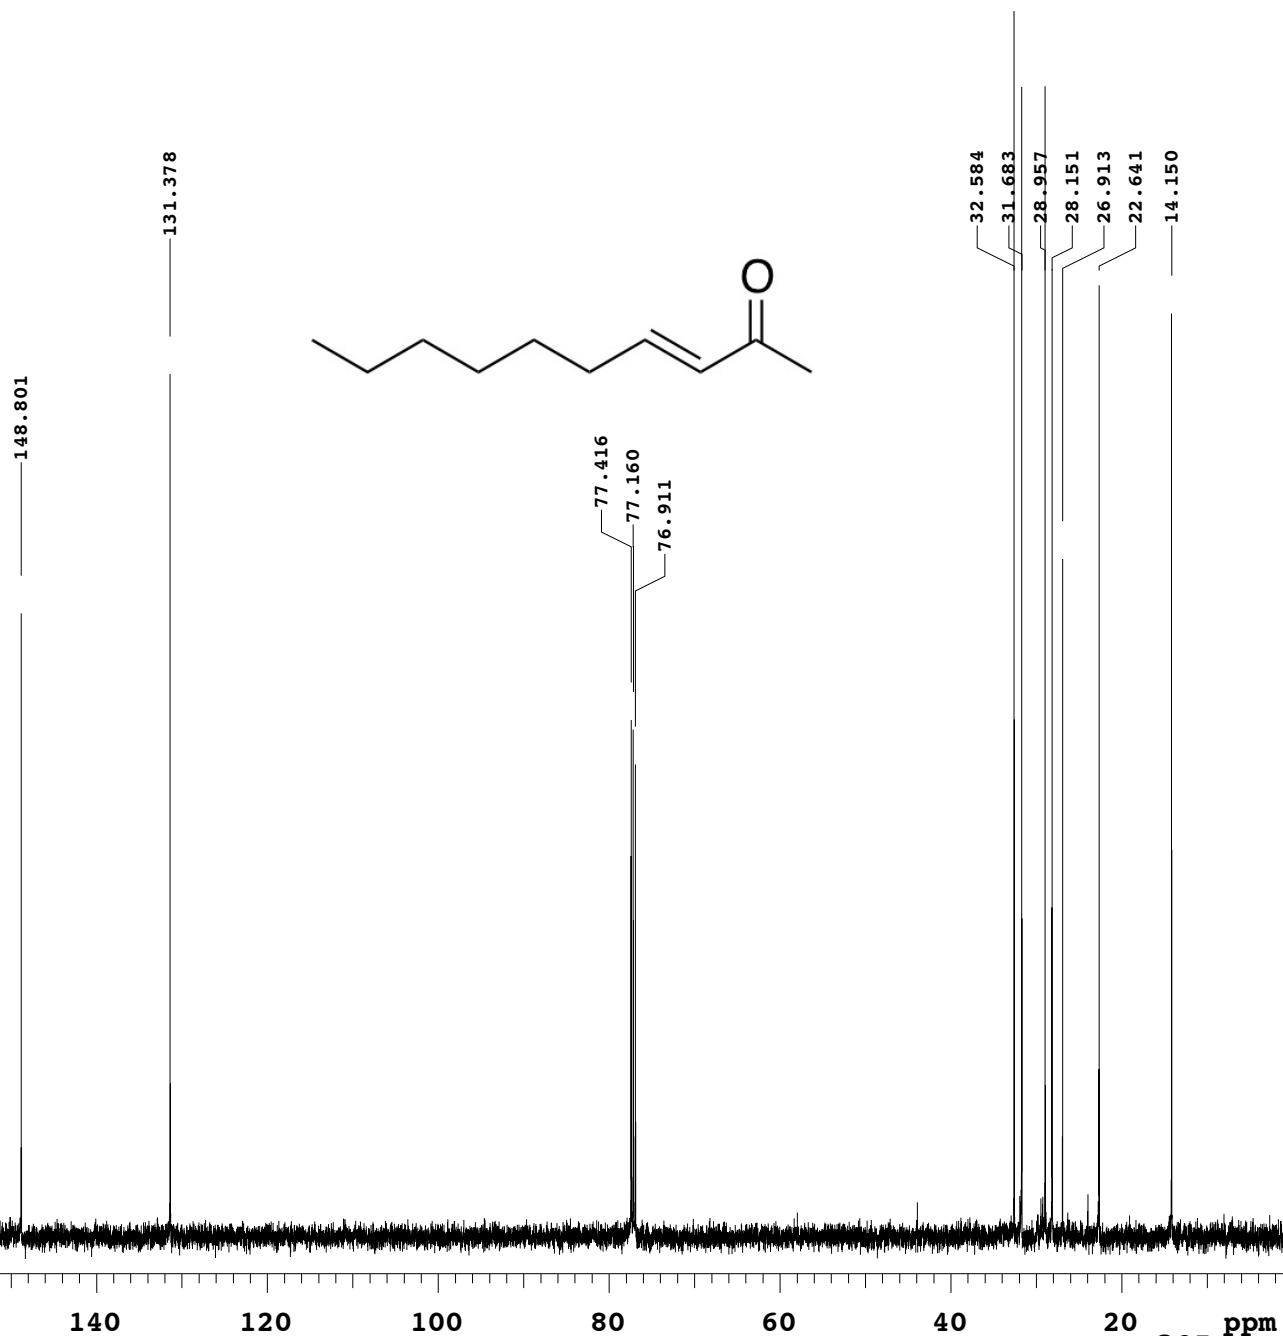

200 180 160 140 120 100 80 60 40 20 ppm

expl s2pul

| SAMPLE              |                | DEC. & VT |         |
|---------------------|----------------|-----------|---------|
| date                | Jan 16 2013    | dfrq      | 500.070 |
| solvent             | CDC13          | dn        | H1      |
| file                | /export/home/~ | dpwr      | 18      |
| data/ui500nb/White~ |                | dof       | 0       |
| /bigi/MAB.1445A.be~ |                | dm        | nnn     |
| nzoate.proton.fid   |                | dmm       | c       |

| ACQUISITION |          |            |     |
|-------------|----------|------------|-----|
| sfrq        | 500.070  | dseq       |     |
| tn          | H1       | dres       | 1.0 |
| at          | 4.096    | homo       | n   |
| np          | 65536    | DEC2       |     |
| sw          | 8000.0   | dfrq2      | 0   |
| fb          | 4000     | dn2        |     |
| bs          | 16       | dpwr2      | 1   |
| tpwr        | 58       | dof2       | 0   |
| pw          | 6.5      | dm2        | n   |
| d1          | 15.000   | dmm2       | c   |
| tof         | 0        | dmf2       | 200 |
| nt          | 4        | dseq2      |     |
| ct          | 4        | dres2      | 1.0 |
| alock       | n        | homo2      | n   |
| gain        | not used | PROCESSING |     |

| FLAGS |    |        |          |
|-------|----|--------|----------|
| il    | n  | wtfile |          |
| in    | n  | proc   | ft       |
| dp    | y  | fn     | not used |
| hs    | nn | math   | f        |

| DISPLAY |         |      |  |
|---------|---------|------|--|
| sp      | -995.5  | werr |  |
| wp      | 6980.7  | wexp |  |
| vs      | 32      | wbs  |  |
| sc      | 0       | wnt  |  |
| wc      | 250     |      |  |
| hzmm    | 27.92   |      |  |
| is      | 33.57   |      |  |
| rfl     | 1510.9  |      |  |
| rfp     | 0       |      |  |
| th      | 7       |      |  |
| ins     | 100.000 |      |  |
| ai      | ph      |      |  |

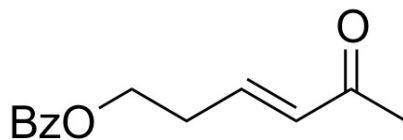

11 10 9 8 7 6 5 4 3 2 1 -0 -1 ppm

S66

expl s2pul

|                     |                |            |          |
|---------------------|----------------|------------|----------|
| SAMPLE              |                | DEC. & VT  |          |
| date                | Jan 16 2013    | dfrq       | 499.692  |
| solvent             | CDC13          | dn         | H1       |
| file                | /export/home/~ | dpwr       | 45       |
| data/u500/White/bi- | dof            | -827.6     |          |
| gi/MAB.1445A.benzo- | dm             | YYY        |          |
| ate.carbon.fid      | dmm            | w          |          |
| ACQUISITION         |                | dmf        | 20202    |
| sfrq                | 125.661        | dseq       |          |
| tn                  | C13            | dres       | 90.0     |
| at                  | 1.086          | homo       | n        |
| np                  | 65536          | DEC2       |          |
| sw                  | 30165.9        | dfrq2      | 0        |
| fb                  | 17000          | dn2        |          |
| bs                  | 16             | dpwr2      | 1        |
| ss                  | 1              | dof2       | 0        |
| tpwr                | 60             | dm2        | n        |
| pw                  | 6.0            | dmm2       | c        |
| d1                  | 1.000          | dmf2       | 10000    |
| tof                 | 1884.7         | dseq2      |          |
| nt                  | 1200           | dres2      | 1.0      |
| ct                  | 128            | homo2      | n        |
| alock               | n              | PROCESSING |          |
| gain                | not used       | lb         | 1.00     |
| FLAGS               |                | wtfile     |          |
| il                  | n              | proc       | ft       |
| in                  | n              | fn         | not used |
| dp                  | y              | math       | f        |
| hs                  | nn             |            |          |
| DISPLAY             |                | werr       |          |
| sp                  | 47.2           | wexp       |          |
| wp                  | 27691.4        | wbs        |          |
| vs                  | 162            | wnt        |          |
| sc                  | 0              |            |          |
| wc                  | 250            |            |          |
| hzmm                | 110.77         |            |          |
| is                  | 500.00         |            |          |
| rfl                 | 10973.4        |            |          |
| rfp                 | 9694.9         |            |          |
| th                  | 12             |            |          |
| ins                 | 100.000        |            |          |
| nm                  | ph             |            |          |

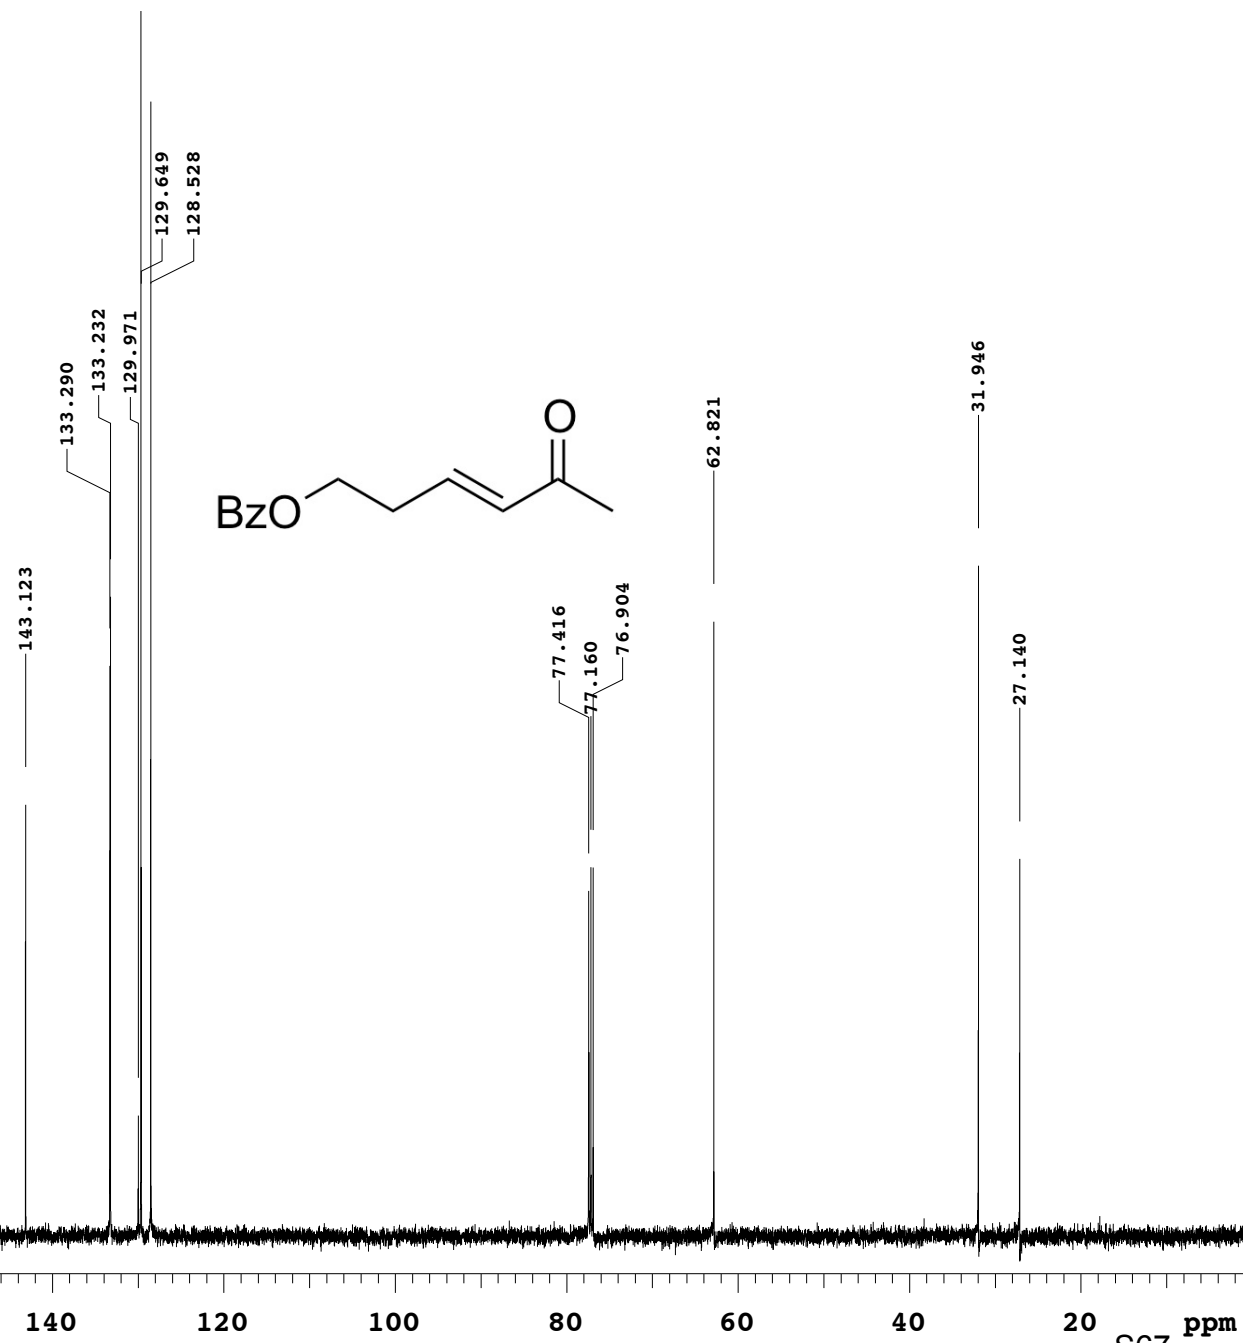

expl s2pul

| SAMPLE              |                | DEC. & VT |         |
|---------------------|----------------|-----------|---------|
| date                | Jan 16 2013    | dfrq      | 500.070 |
| solvent             | CDC13          | dn        | H1      |
| file                | /export/home/~ | dpwr      | 18      |
| data/ui500nb/White~ |                | dof       | 0       |
| /bigi/MAB.1442A.ph~ |                | dm        | nnn     |
| thalimide.proton.f~ |                | dmm       | c       |
|                     |                | id        | dmf     |
|                     |                |           | 200     |

| ACQUISITION |         |       |     |
|-------------|---------|-------|-----|
| sfrq        | 500.070 | dseq  | 1.0 |
| tn          | H1      | homo  | n   |
| at          | 4.096   | DEC2  |     |
| np          | 65536   | dfrq2 | 0   |
| sw          | 8000.0  | dn2   |     |
| fb          | 4000    | dpwr2 | 1   |
| bs          | 16      | dof2  | 0   |
| tpwr        | 58      | dm2   | n   |
| pw          | 6.5     | dmm2  | c   |
| d1          | 15.000  | dmf2  | 200 |
| tof         | 0       | dseq2 |     |
| nt          | 8       | dres2 | 1.0 |
| ct          | 8       | homo2 | n   |

| PROCESSING |          |    |      |
|------------|----------|----|------|
| alock      | n        | lb | 0.30 |
| gain       | not used |    |      |

| FLAGS |    |      |          |
|-------|----|------|----------|
| il    | n  | proc | ft       |
| in    | n  | fn   | not used |
| dp    | y  | math | f        |
| hs    | nn |      |          |

| DISPLAY |         |      |  |
|---------|---------|------|--|
| sp      | -971.8  | wexp |  |
| wp      | 6980.7  | wbs  |  |
| vs      | 42      | wnt  |  |
| sc      | 0       |      |  |
| wc      | 250     |      |  |
| hzmm    | 27.92   |      |  |
| is      | 33.57   |      |  |
| rfl     | 1510.6  |      |  |
| rfp     | 0       |      |  |
| th      | 7       |      |  |
| ins     | 100.000 |      |  |
| ai      | ph      |      |  |

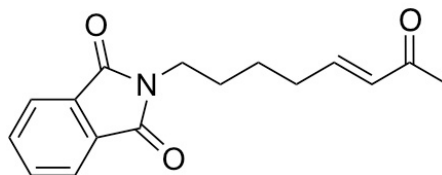

11 10 9 8 7 6 5 4 3 2 1 -0 -1 ppm

S68

expl s2pul

SAMPLE DEC. & VT  
 date Jan 16 2013 dfrq 499.432  
 solvent CDC13 dn H1  
 file /export/home/~ dpwr 47  
 data/vxr500/White/~ dof -827.0  
 bigi/MAB.1442A.pht~ dm YYY  
 halimide.carbon.fi~ dmm w  
 d dmf 15873

ACQUISITION dseq  
 sfrq 125.596 dres 1.0  
 tn C13 homo n  
 at 1.024 DEC2  
 np 65536 dfrq2 0  
 sw 32000.0 dn2  
 fb 18000 dpwr2 1  
 bs 16 dof2 0  
 ss 1 dm2 n  
 tpwr 63 dmm2 c  
 pw 4.5 dmf2 18519  
 d1 1.000 dseq2  
 tof 1880.0 dres2 1.0  
 nt 1200 homo2 n  
 ct 256

PROCESSING  
 alock n lb 1.00  
 gain not used wtfile  
 FLAGS proc ft  
 il n fn not used  
 in n math f  
 dp Y  
 hs nn werr

DISPLAY wexp  
 sp -94.3 wbs  
 wp 27688.5 wnt  
 vs 162  
 sc 0  
 wc 250  
 hzmm 110.75  
 is 500.00  
 rfl 11892.6  
 rfp 9689.9  
 th 8  
 ins 100.000  
 nm ph

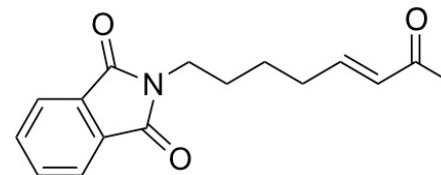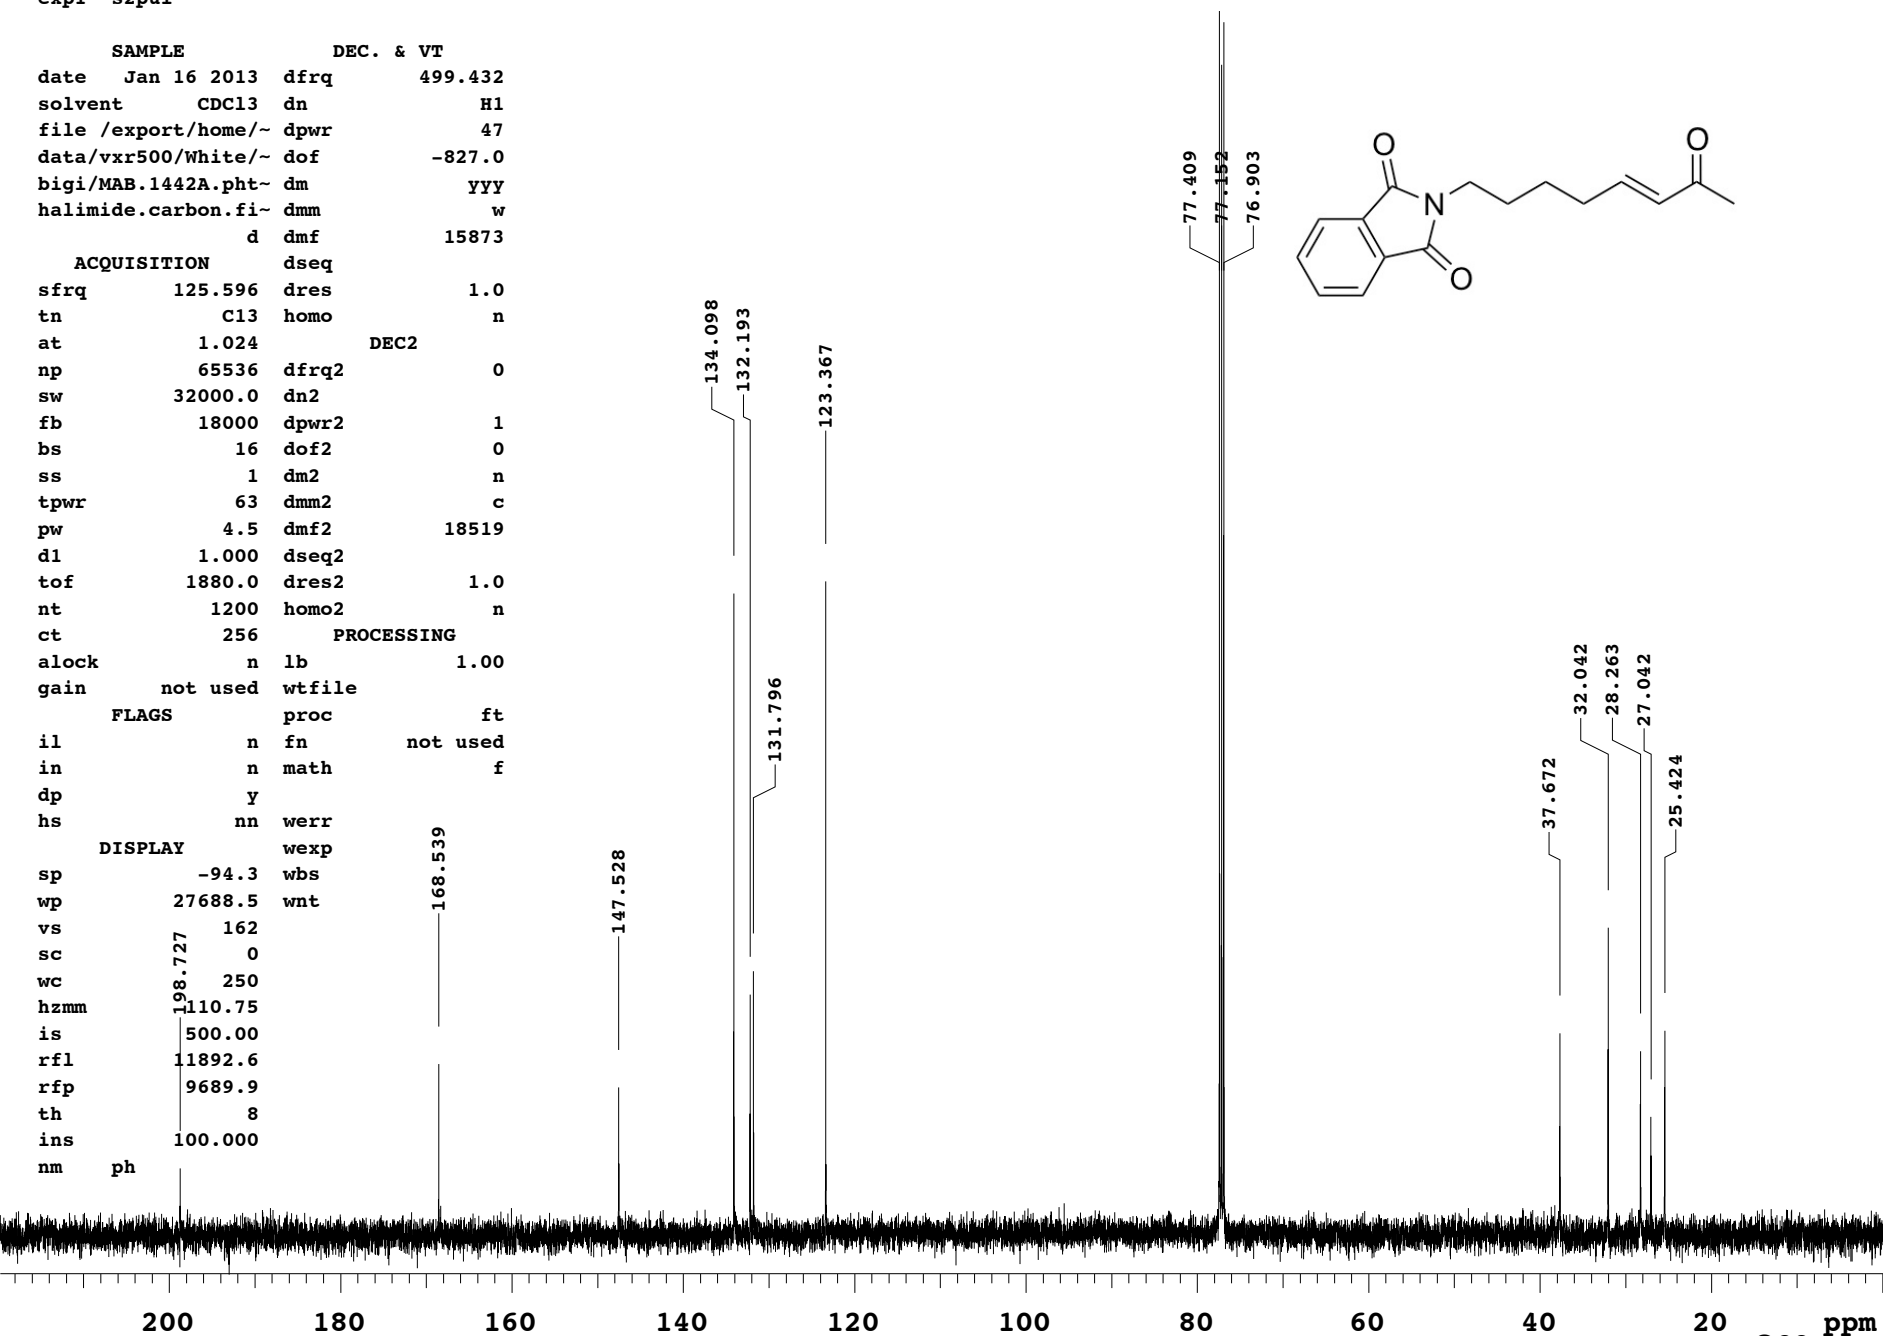

expl s2pul

| SAMPLE              |                | DEC. & VT |         |
|---------------------|----------------|-----------|---------|
| date                | Jan 22 2013    | dfrq      | 500.070 |
| solvent             | CDC13          | dn        | H1      |
| file                | /export/home/~ | dpwr      | 18      |
| data/ui500nb/White~ |                | dof       | 0       |
| /bigi/MAB.1532A.mo~ |                | dm        | nnn     |
| rpholine.proton.fi~ |                | dmm       | c       |
|                     |                | d         | dmf     |
|                     |                |           | 200     |

| ACQUISITION |         |       |     |
|-------------|---------|-------|-----|
| sfrq        | 500.070 | dseq  | 1.0 |
| tn          | H1      | homo  | n   |
| at          | 4.096   | DEC2  |     |
| np          | 65536   | dfrq2 | 0   |
| sw          | 8000.0  | dn2   |     |
| fb          | 4000    | dpwr2 | 1   |
| bs          | 16      | dof2  | 0   |
| tpwr        | 58      | dm2   | n   |
| pw          | 6.5     | dmm2  | c   |
| d1          | 15.000  | dmf2  | 200 |
| tof         | 0       | dseq2 |     |
| nt          | 8       | dres2 | 1.0 |
| ct          | 8       | homo2 | n   |

| PROCESSING |          |    |      |
|------------|----------|----|------|
| alock      | n        | lb | 0.30 |
| gain       | not used |    |      |

| FLAGS |    |      |          |
|-------|----|------|----------|
| il    | n  | proc | ft       |
| in    | n  | fn   | not used |
| dp    | y  | math | f        |
| hs    | nn |      |          |

| DISPLAY |         |      |  |
|---------|---------|------|--|
| sp      | -1018.7 | wexp |  |
| wp      | 7027.6  | wbs  |  |
| vs      | 52      | wnt  |  |
| sc      | 0       |      |  |
| wc      | 250     |      |  |
| hzmm    | 28.11   |      |  |
| is      | 33.57   |      |  |
| rfl     | 5141.1  |      |  |
| rfp     | 3630.5  |      |  |
| th      | 7       |      |  |
| ins     | 100.000 |      |  |
| ai      | ph      |      |  |

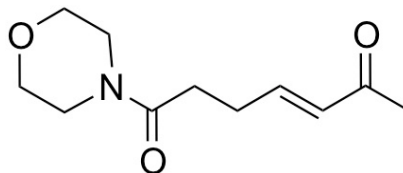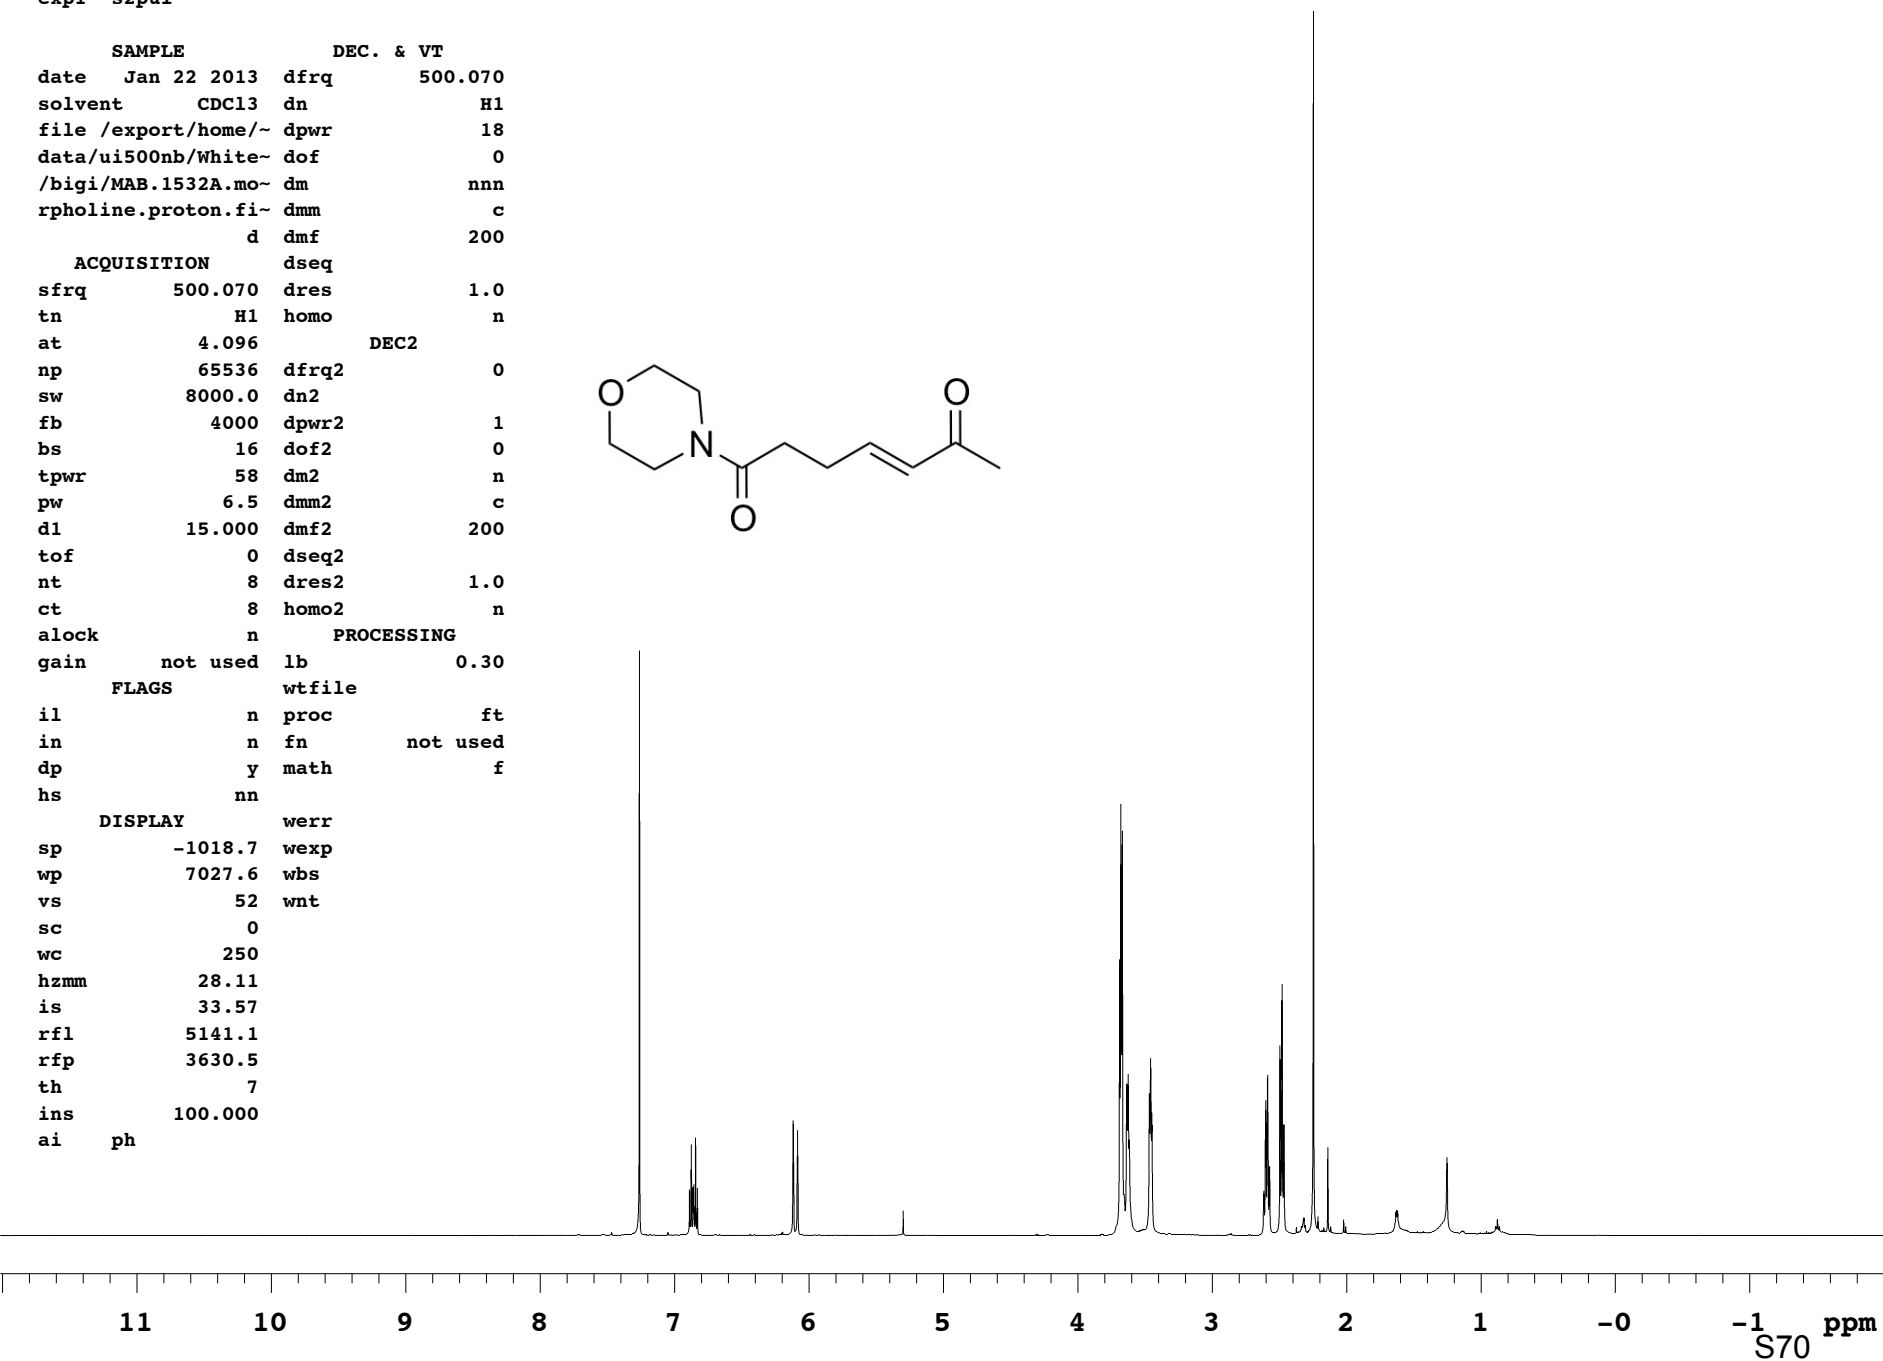

expl s2pul

| SAMPLE              |                | DEC. & VT  |          |
|---------------------|----------------|------------|----------|
| date                | Jan 22 2013    | dfrq       | 499.692  |
| solvent             | CDC13          | dn         | H1       |
| file                | /export/home/~ | dpwr       | 45       |
| data/u500/White/bi- | dof            | -827.6     |          |
| gi/MAB.1532A.morph- | dm             | YYY        |          |
| oline.carbon.fid    | dmm            | w          |          |
| ACQUISITION         |                | dmf        | 20202    |
| sfrq                | 125.661        | dseq       |          |
| tn                  | C13            | dres       | 90.0     |
| at                  | 1.086          | homo       | n        |
| np                  | 65536          | DEC2       |          |
| sw                  | 30165.9        | dfrq2      | 0        |
| fb                  | 17000          | dn2        |          |
| bs                  | 16             | dpwr2      | 1        |
| ss                  | 1              | dof2       | 0        |
| tpwr                | 60             | dm2        | n        |
| pw                  | 6.0            | dmm2       | c        |
| d1                  | 1.000          | dmf2       | 10000    |
| tof                 | 1884.7         | dseq2      |          |
| nt                  | 1200           | dres2      | 1.0      |
| ct                  | 192            | homo2      | n        |
| alock               |                | PROCESSING |          |
| gain                | not used       | lb         | 1.00     |
| FLAGS               |                | wtfile     |          |
| il                  | n              | proc       | ft       |
| in                  | n              | fn         | not used |
| dp                  | y              | math       | f        |
| hs                  | nn             |            |          |
| DISPLAY             |                | werr       |          |
| sp                  | 7.6            | wexp       |          |
| wp                  | 603.0          | wbs        |          |
| vs                  | 162            | wnt        |          |
| sc                  | 0              |            |          |
| wc                  | 250            |            |          |
| hzmm                | 110.41         |            |          |
| is                  | 500.00         |            |          |
| rfl                 | 10968.8        |            |          |
| rfp                 | 9694.9         |            |          |
| th                  | 17             |            |          |
| ins                 | 100.000        |            |          |
| nm                  | ph             |            |          |

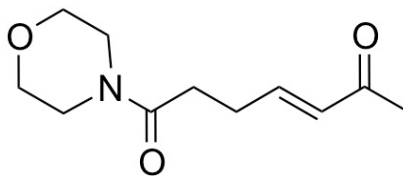

200 180 160 140 120 100 80 60 40 20 ppm

S71

expl s2pul

| SAMPLE              |                | DEC. & VT |         |
|---------------------|----------------|-----------|---------|
| date                | Jan 23 2013    | dfrq      | 500.070 |
| solvent             | CDC13          | dn        | H1      |
| file                | /export/home/~ | dpwr      | 18      |
| data/ui500nb/White~ |                | dof       | 0       |
| /bigi/MAB.1536A.CH~ |                | dm        | nnn     |
| 3ester.proton.fid   |                | dmm       | c       |

| ACQUISITION |         |       |     |
|-------------|---------|-------|-----|
| sfrq        | 500.070 | dseq  |     |
| tn          | H1      | dres  | 1.0 |
| at          | 4.096   | homo  | n   |
| np          | 65536   | DEC2  |     |
| sw          | 8000.0  | dfrq2 | 0   |
| fb          | 4000    | dn2   |     |
| bs          | 16      | dpwr2 | 1   |
| tpwr        | 58      | dof2  | 0   |
| pw          | 6.5     | dm2   | n   |
| d1          | 15.000  | dmm2  | c   |
| tof         | 0       | dmf2  | 200 |
| nt          | 4       | dseq2 |     |
| ct          | 4       | dres2 | 1.0 |
| alock       | n       | homo2 | n   |

| PROCESSING |          |        |          |
|------------|----------|--------|----------|
| gain       | not used | lb     | 0.30     |
| il         | n        | wtfile |          |
| in         | n        | proc   | ft       |
| dp         | y        | fn     | not used |
| hs         | nn       | math   | f        |

| DISPLAY |         |      |  |
|---------|---------|------|--|
| sp      | -1007.2 | werr |  |
| wp      | 7015.9  | wexp |  |
| vs      | 22      | wbs  |  |
| sc      | 0       | wnt  |  |
| wc      | 250     |      |  |
| hzmm    | 28.06   |      |  |
| is      | 33.57   |      |  |
| rfl     | 5141.4  |      |  |
| rfp     | 3630.5  |      |  |
| th      | 7       |      |  |
| ins     | 100.000 |      |  |
| ai      | ph      |      |  |

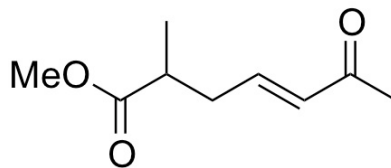

11 10 9 8 7 6 5 4 3 2 1 -0 -1 ppm



expl s2pul

| SAMPLE      |             | DEC. & VT  |         |
|-------------|-------------|------------|---------|
| date        | Jan 23 2013 | dfrq       | 499.692 |
| solvent     | CDC13       | dn         | H1      |
| file        | exp         | dpwr       | 45      |
| ACQUISITION |             | dof        |         |
| sfrq        | 125.661     | dm         | YYY     |
| tn          | C13         | dmm        | w       |
| at          | 1.086       | dmf        | 20202   |
| np          | 65536       | dseq       |         |
| sw          | 30165.9     | dres       | 90.0    |
| fb          | 17000       | homo       | n       |
| bs          | 16          | DEC2       |         |
| ss          | 1           | dfrq2      | 0       |
| tpwr        | 60          | dn2        |         |
| pw          | 6.0         | dpwr2      | 1       |
| d1          | 1.000       | dof2       | 0       |
| tof         | 1884.7      | dm2        | n       |
| nt          | 1200        | dmm2       | c       |
| ct          | 129         | dmf2       | 10000   |
| alock       | n           | dseq2      |         |
| gain        | not used    | dres2      | 1.0     |
| FLAGS       |             | homo2      |         |
| il          | n           | PROCESSING |         |
| in          | n           | lb         | 1.00    |
| dp          | y           | wtfiler    |         |
| hs          | nn          | proc       | ft      |
| DISPLAY     |             | fn         |         |
| sp          | 13.1        | math       | f       |
| wp          | 676.6       |            |         |
| vs          | 162         | werr       |         |
| sc          | 0           | wexp       |         |
| wc          | 250         | wbs        |         |
| hzmm        | 110.71      | wnt        |         |
| is          | 500.00      |            |         |
| rfl         | 10970.7     |            |         |
| rfp         | 9694.9      |            |         |
| th          | 23          |            |         |
| ins         | 100.000     |            |         |
| nm          | ph          |            |         |

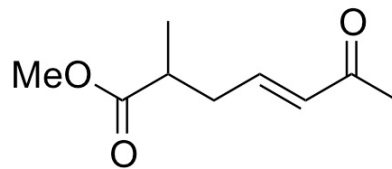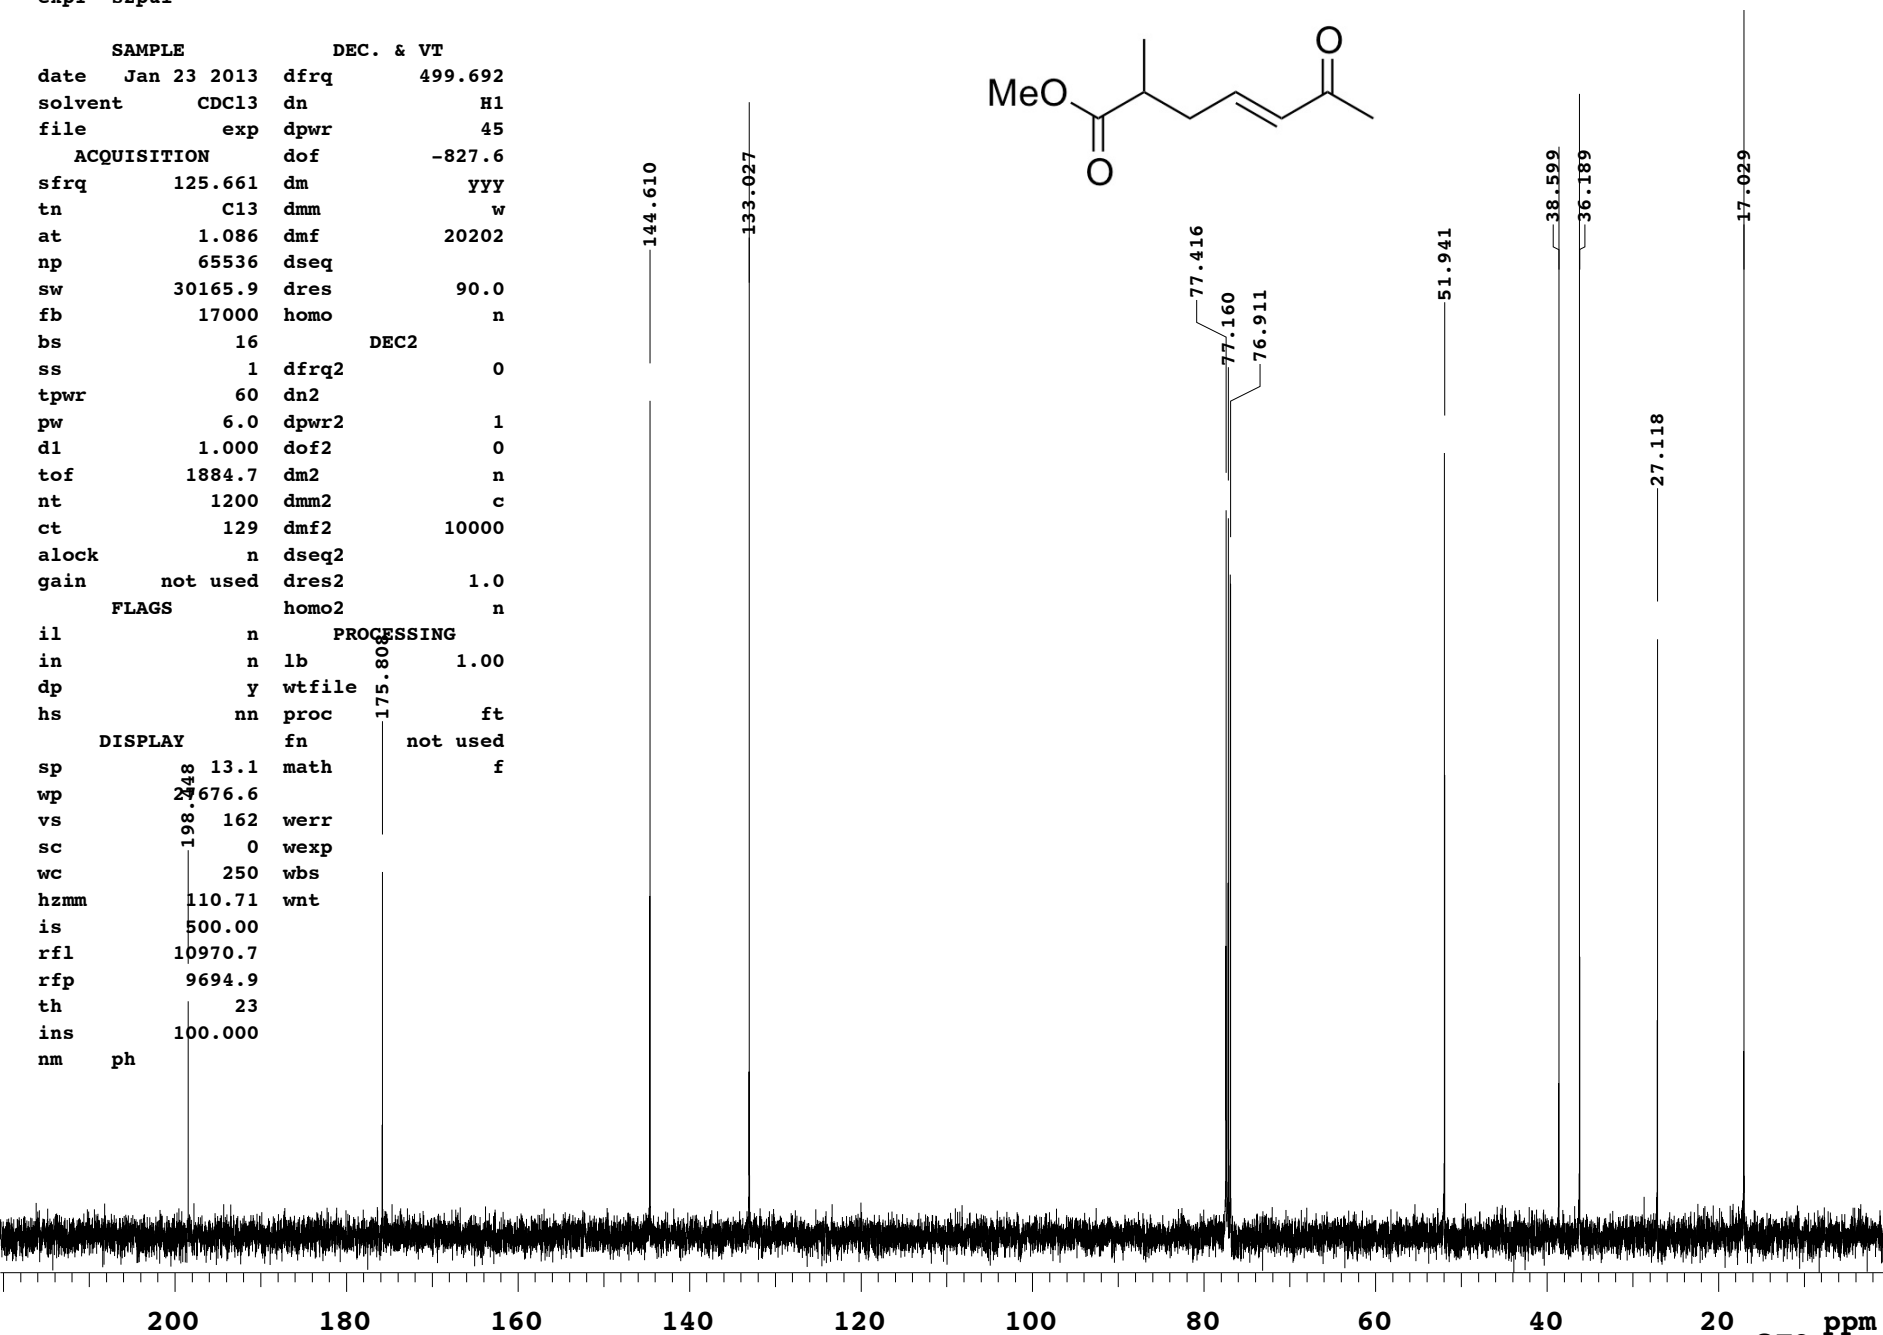

expl s2pul

SAMPLE DEC. & VT  
 date Jan 23 2013 dfrq 500.070  
 solvent CDC13 dn H1  
 file /export/home/~ dpwr 18  
 data/ui500nb/White~ dof 0  
 /bigi/MAB.1540A.be~ dm nnn  
 nzyloxy.proton.fid dmm c

ACQUISITION dmf 200  
 sfrq 500.070 dseq  
 tn H1 dres 1.0  
 at 4.096 homo n  
 np 65536 DEC2  
 sw 8000.0 dfrq2 0  
 fb 4000 dn2  
 bs 16 dpwr2 1  
 tpwr 58 dof2 0  
 pw 6.5 dm2 n  
 d1 15.000 dmm2 c  
 tof 0 dmf2 200  
 nt 4 dseq2  
 ct 4 dres2 1.0  
 alock n homo2 n

gain not used PROCESSING  
 FLAGS lb 0.30  
 il n wtfile  
 in n proc ft  
 dp y fn not used  
 hs nn math f

DISPLAY  
 sp -1007.0 werr  
 wp 7004.2 wexp  
 vs 35 wbs  
 sc 0 wnt  
 wc 250  
 hzmm 28.02  
 is 33.57  
 rfl 1510.6  
 rfp 0  
 th 7  
 ins 100.000  
 ai ph

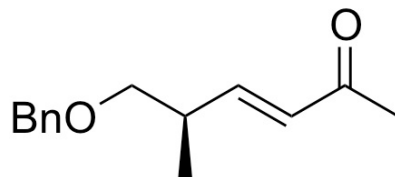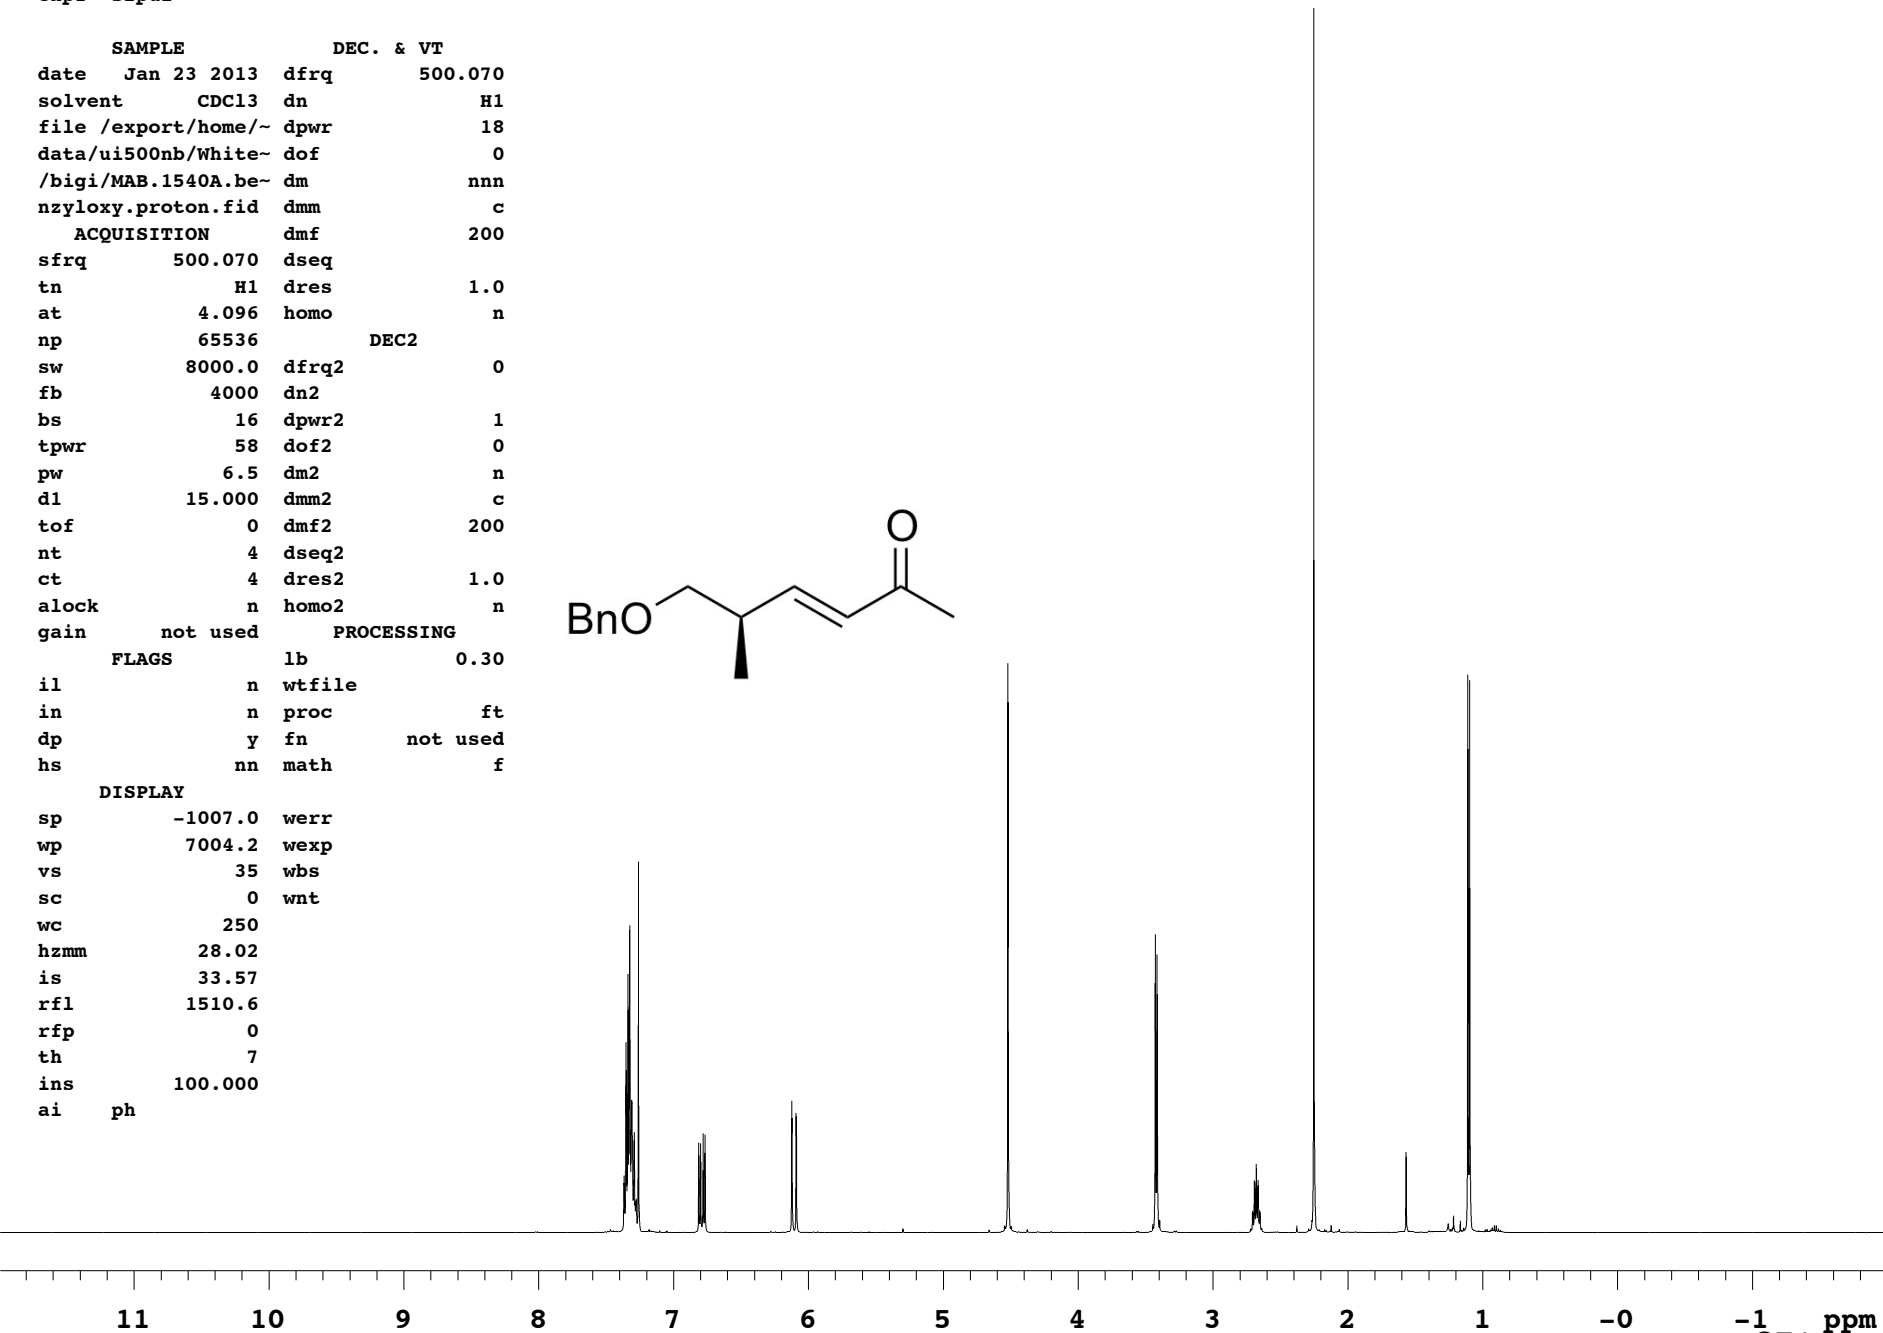

expl s2pul

| SAMPLE              |                | DEC. & VT  |          |
|---------------------|----------------|------------|----------|
| date                | Jan 23 2013    | dfrq       | 499.692  |
| solvent             | CDC13          | dn         | H1       |
| file                | /export/home/~ | dpwr       | 45       |
| data/u500/White/bi- | dof            | -827.6     |          |
| gi/MAB.1540A.benzy- | dm             | YYY        |          |
| loxy.carbon.fid     | dmm            | w          |          |
| ACQUISITION         |                | dmf        |          |
| sfrq                | 125.661        | dseq       | 20202    |
| tn                  | C13            | dres       | 90.0     |
| at                  | 1.086          | homo       | n        |
| np                  | 65536          | DEC2       |          |
| sw                  | 30165.9        | dfrq2      | 0        |
| fb                  | 17000          | dn2        |          |
| bs                  | 16             | dpwr2      | 1        |
| ss                  | 1              | dof2       | 0        |
| tpwr                | 60             | dm2        | n        |
| pw                  | 6.0            | dmm2       | c        |
| d1                  | 1.000          | dmf2       | 10000    |
| tof                 | 1884.7         | dseq2      |          |
| nt                  | 1200           | dres2      | 1.0      |
| ct                  | 128            | homo2      | n        |
| alock               |                | PROCESSING |          |
| gain                | not used       | lb         | 1.00     |
| FLAGS               |                | wtfile     |          |
| il                  | n              | proc       | ft       |
| in                  | n              | fn         | not used |
| dp                  | y              | math       | f        |
| hs                  | nn             |            |          |
| DISPLAY             |                | werr       |          |
| sp                  | -82.6          | wexp       |          |
| wp                  | 27691.4        | wbs        |          |
| vs                  | 162            | wnt        |          |
| sc                  | 0              |            |          |
| wc                  | 250            |            |          |
| hzmm                | 110.77         |            |          |
| is                  | 500.00         |            |          |
| rfl                 | 10970.7        |            |          |
| rfp                 | 9694.9         |            |          |
| th                  | 12             |            |          |
| ins                 | 100.000        |            |          |
| nm                  | ph             |            |          |

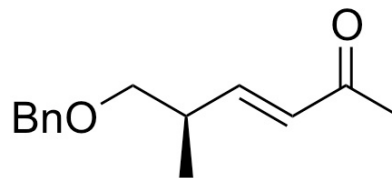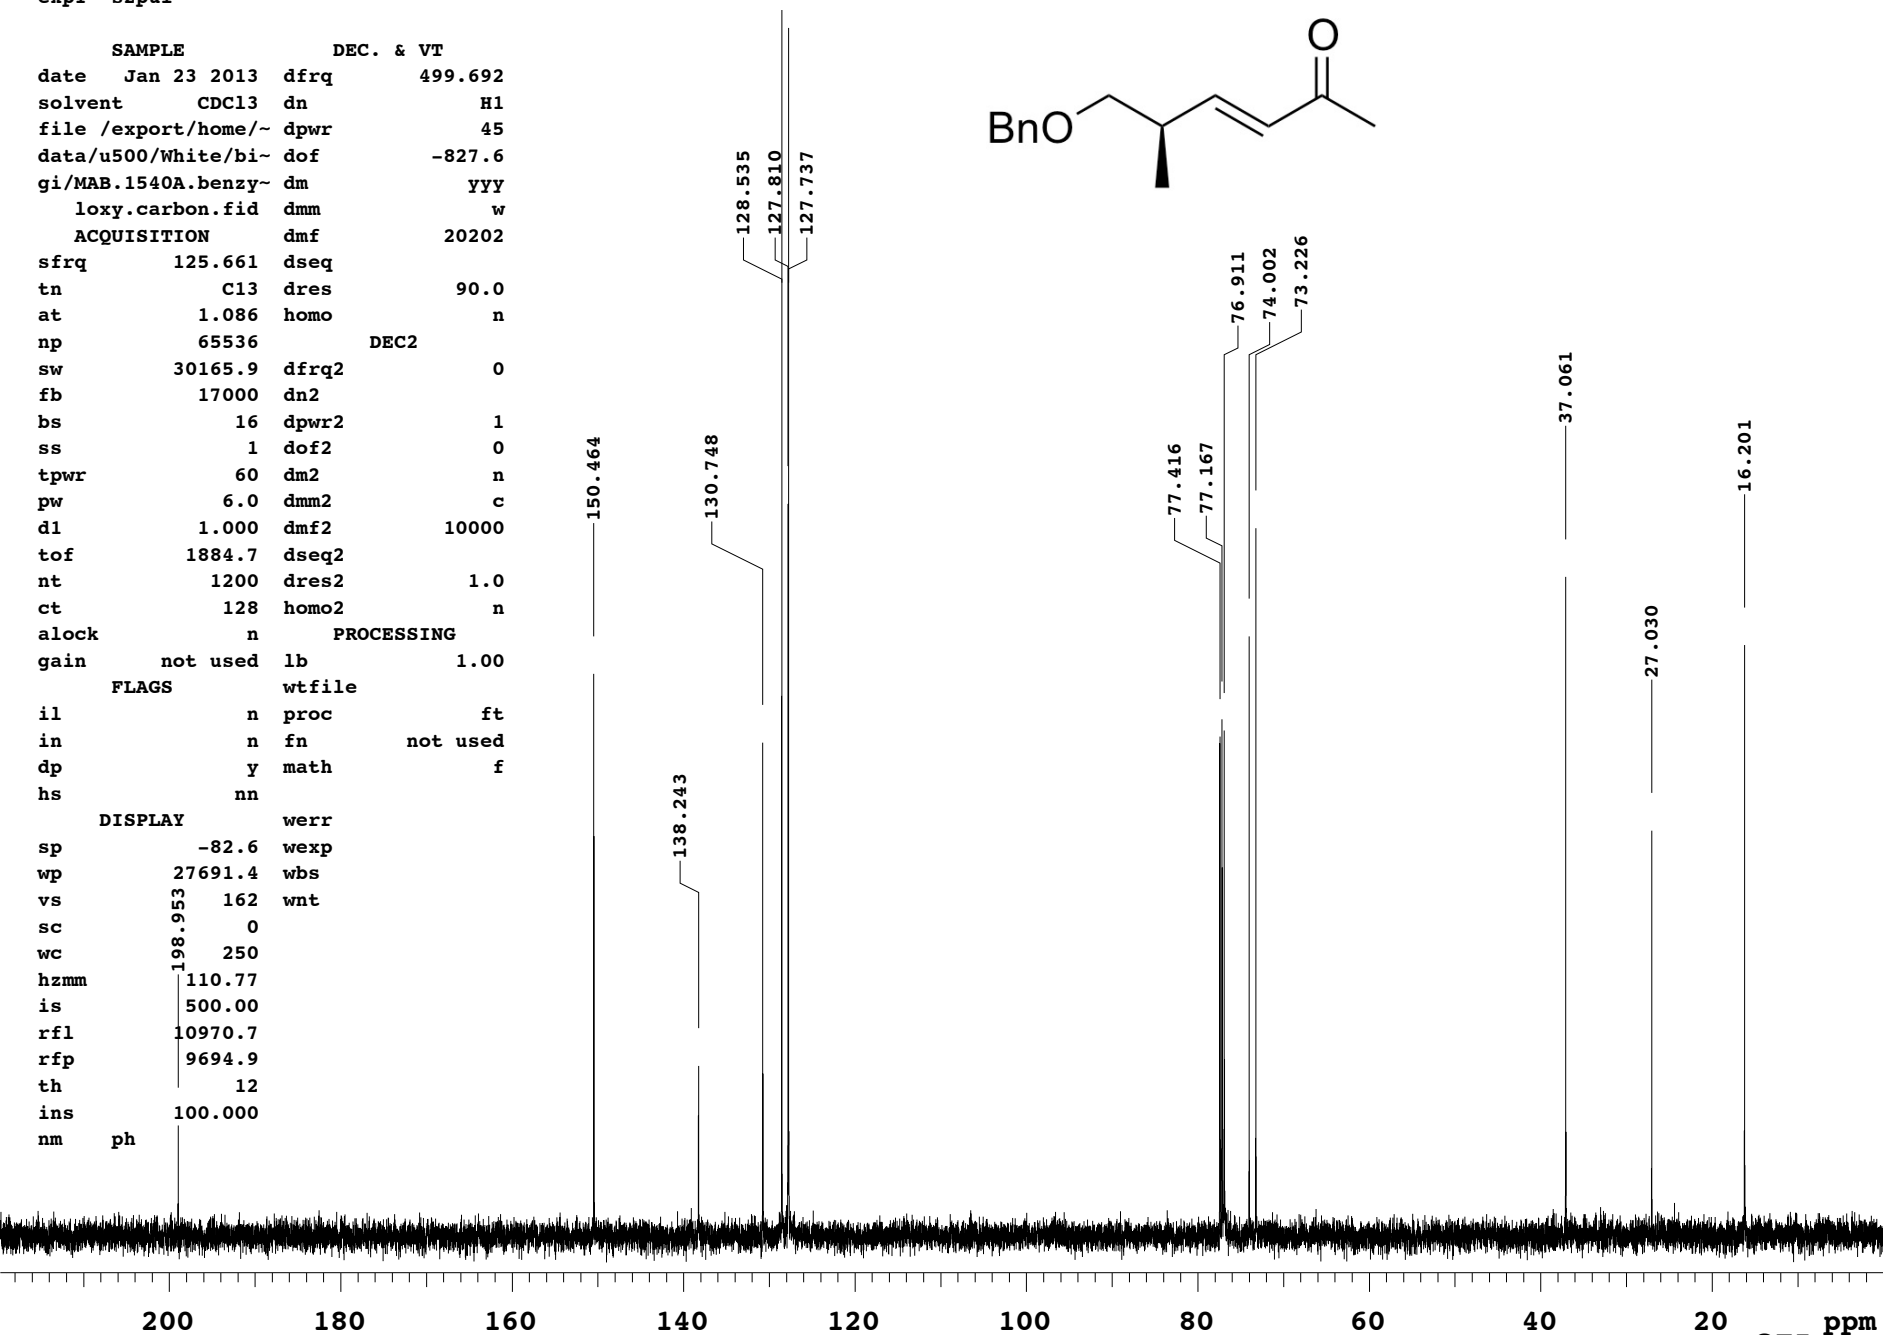

expl s2pul

| SAMPLE              |                | DEC. & VT  |          |
|---------------------|----------------|------------|----------|
| date                | Jan 25 2013    | dfrq       | 500.070  |
| solvent             | CDC13          | dn         | H1       |
| file                | /export/home/~ | dpwr       | 18       |
| data/ui500nb/White~ |                | dof        | 0        |
| /bigi/MAB.1454A.cy~ |                | dm         | nnn      |
| clohexyloAc.proton~ |                | dmm        | c        |
| .fid                |                | dmf        | 200      |
| ACQUISITION         |                | dseq       |          |
| sfrq                | 500.070        | dres       | 1.0      |
| tn                  | H1             | homo       | n        |
| at                  | 4.096          | DEC2       |          |
| np                  | 65536          | dfrq2      | 0        |
| sw                  | 8000.0         | dn2        |          |
| fb                  | 4000           | dpwr2      | 1        |
| bs                  | 16             | dof2       | 0        |
| tpwr                | 58             | dm2        | n        |
| pw                  | 6.5            | dmm2       | c        |
| d1                  | 15.000         | dmf2       | 200      |
| tof                 | 0              | dseq2      |          |
| nt                  | 4              | dres2      | 1.0      |
| ct                  | 4              | homo2      | n        |
| alock               | n              | PROCESSING |          |
| gain                | not used       | lb         | 0.30     |
| FLAGS               |                | wtfile     |          |
| il                  | n              | proc       | ft       |
| in                  | n              | fn         | not used |
| dp                  | y              | math       | f        |
| hs                  | nn             |            |          |
| DISPLAY             |                | werr       |          |
| sp                  | -971.8         | wexp       |          |
| wp                  | 6957.3         | wbs        |          |
| vs                  | 45             | wnt        |          |
| sc                  | 0              |            |          |
| wc                  | 250            |            |          |
| hzmm                | 27.83          |            |          |
| is                  | 33.57          |            |          |
| rfl                 | 1510.6         |            |          |
| rfp                 | 0              |            |          |
| th                  | 7              |            |          |
| ins                 | 100.000        |            |          |
| ai                  | ph             |            |          |

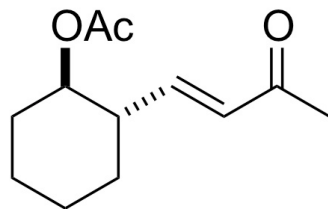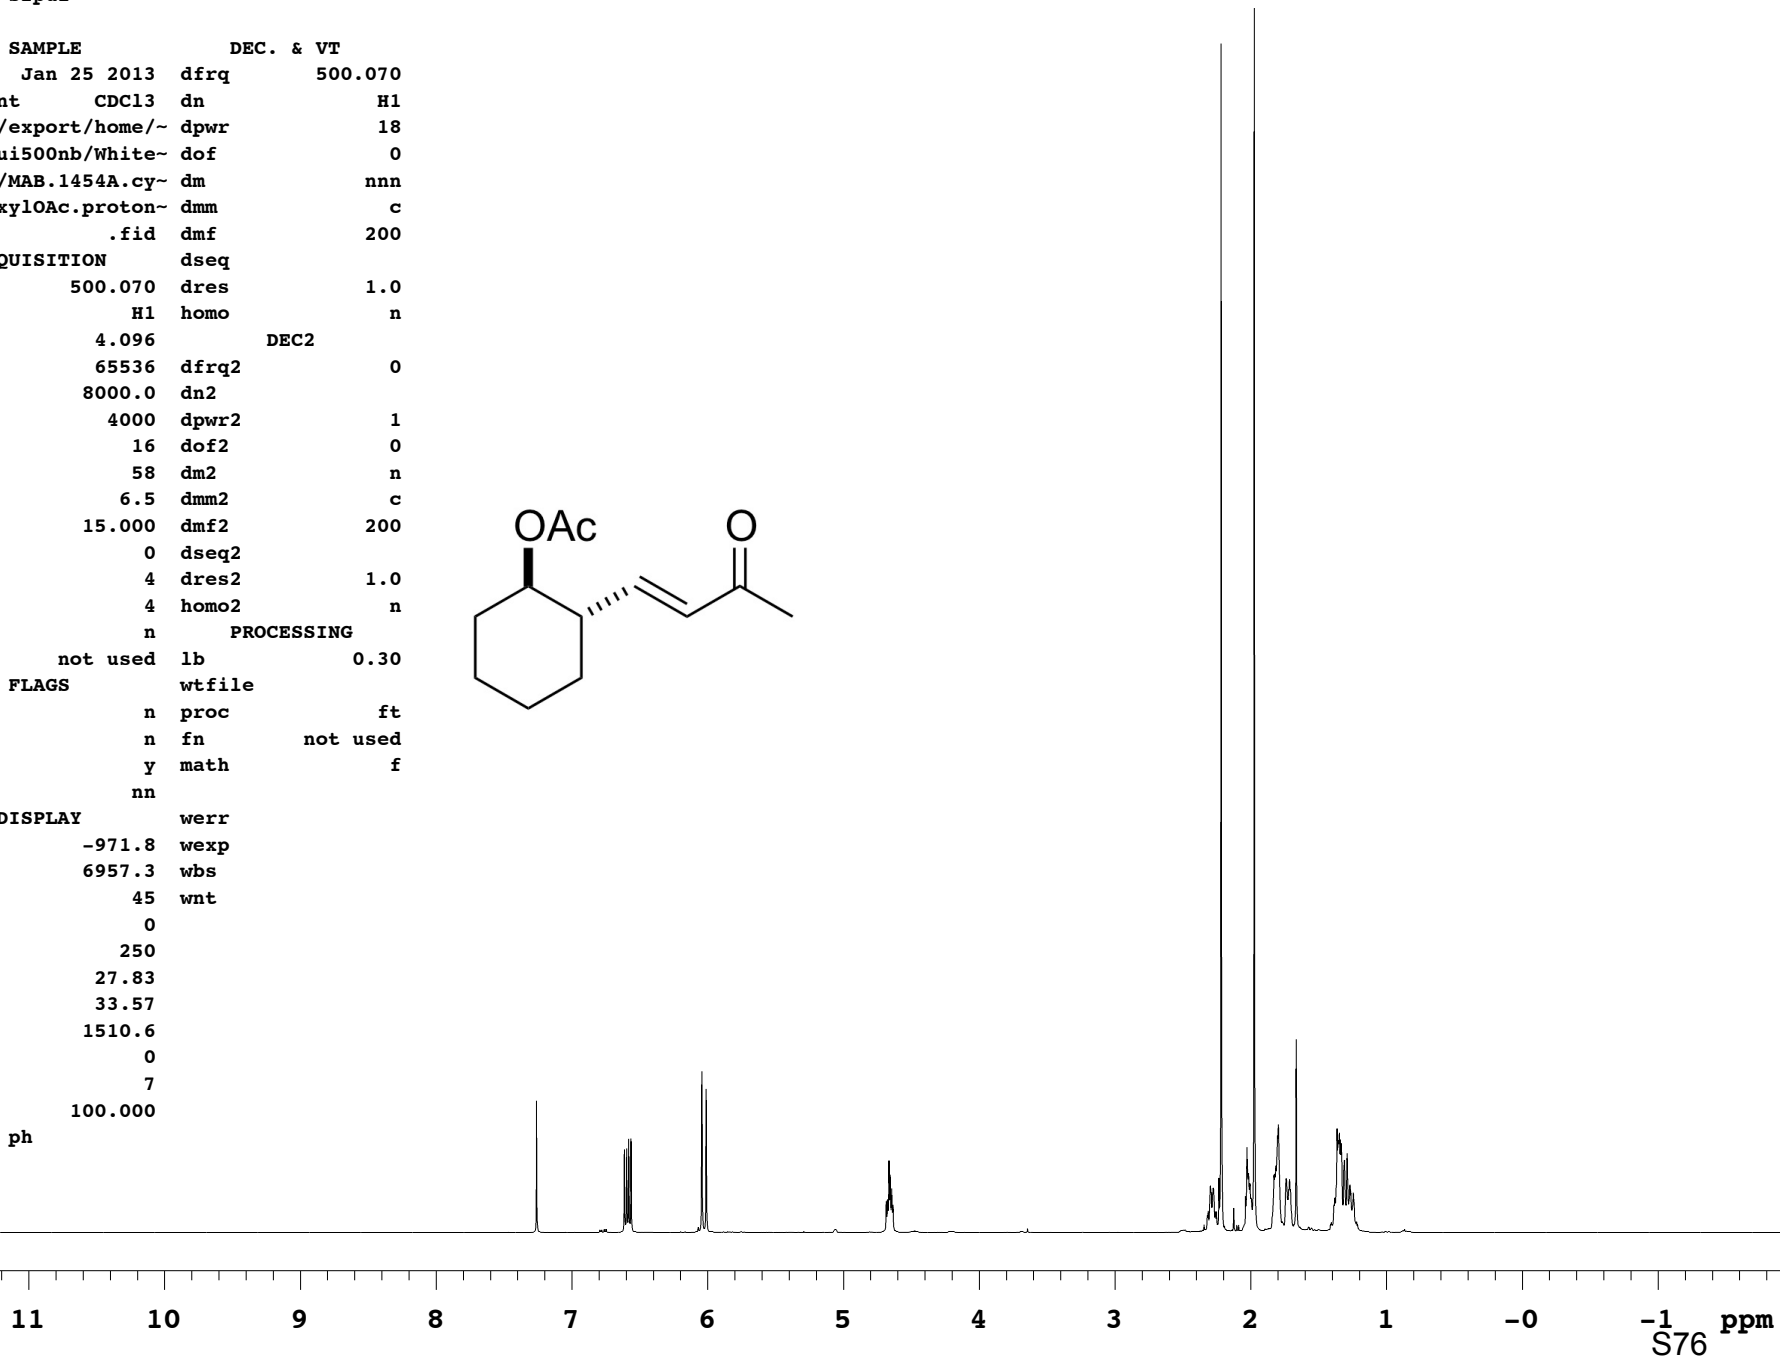

expl s2pul

SAMPLE DEC. & VT  
 date Jan 25 2013 dfrq 499.432  
 solvent CDC13 dn H1  
 file /export/home/~ dpwr 47  
 data/vxr500/White/~ dof -827.0  
 bigi/MAB.1454A.cyc~ dm YYY  
 lohexyloAc.carbon.~ dmm w  
 fid dmf 15873

ACQUISITION dseq  
 sfrq 125.596 dres 1.0  
 tn C13 homo n  
 at 1.024 DEC2  
 np 65536 dfrq2 0  
 sw 32000.0 dn2  
 fb 18000 dpwr2 1  
 bs 16 dof2 0  
 ss 1 dm2 n  
 tpwr 63 dmm2 c  
 pw 4.5 dmf2 18519  
 d1 1.000 dseq2  
 tof 1880.0 dres2 1.0  
 nt 1200 homo2 n  
 ct 256 PROCESSING

alock n lb 1.00  
 gain not used wtfile

FLAGS proc  
 il n fn not used  
 in n math f  
 dp Y  
 hs nn werr

DISPLAY wexp  
 sp 1.4 wbs  
 wp 27641.6 wnt  
 vs 162  
 sc 0  
 wc 250  
 hzmm 110.57  
 is 500.00  
 rfl 11890.6  
 rfp 9689.9  
 th 25  
 ins 100.000  
 nm ph

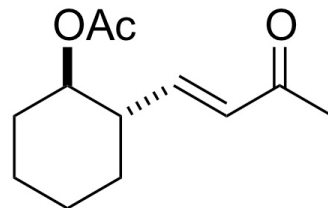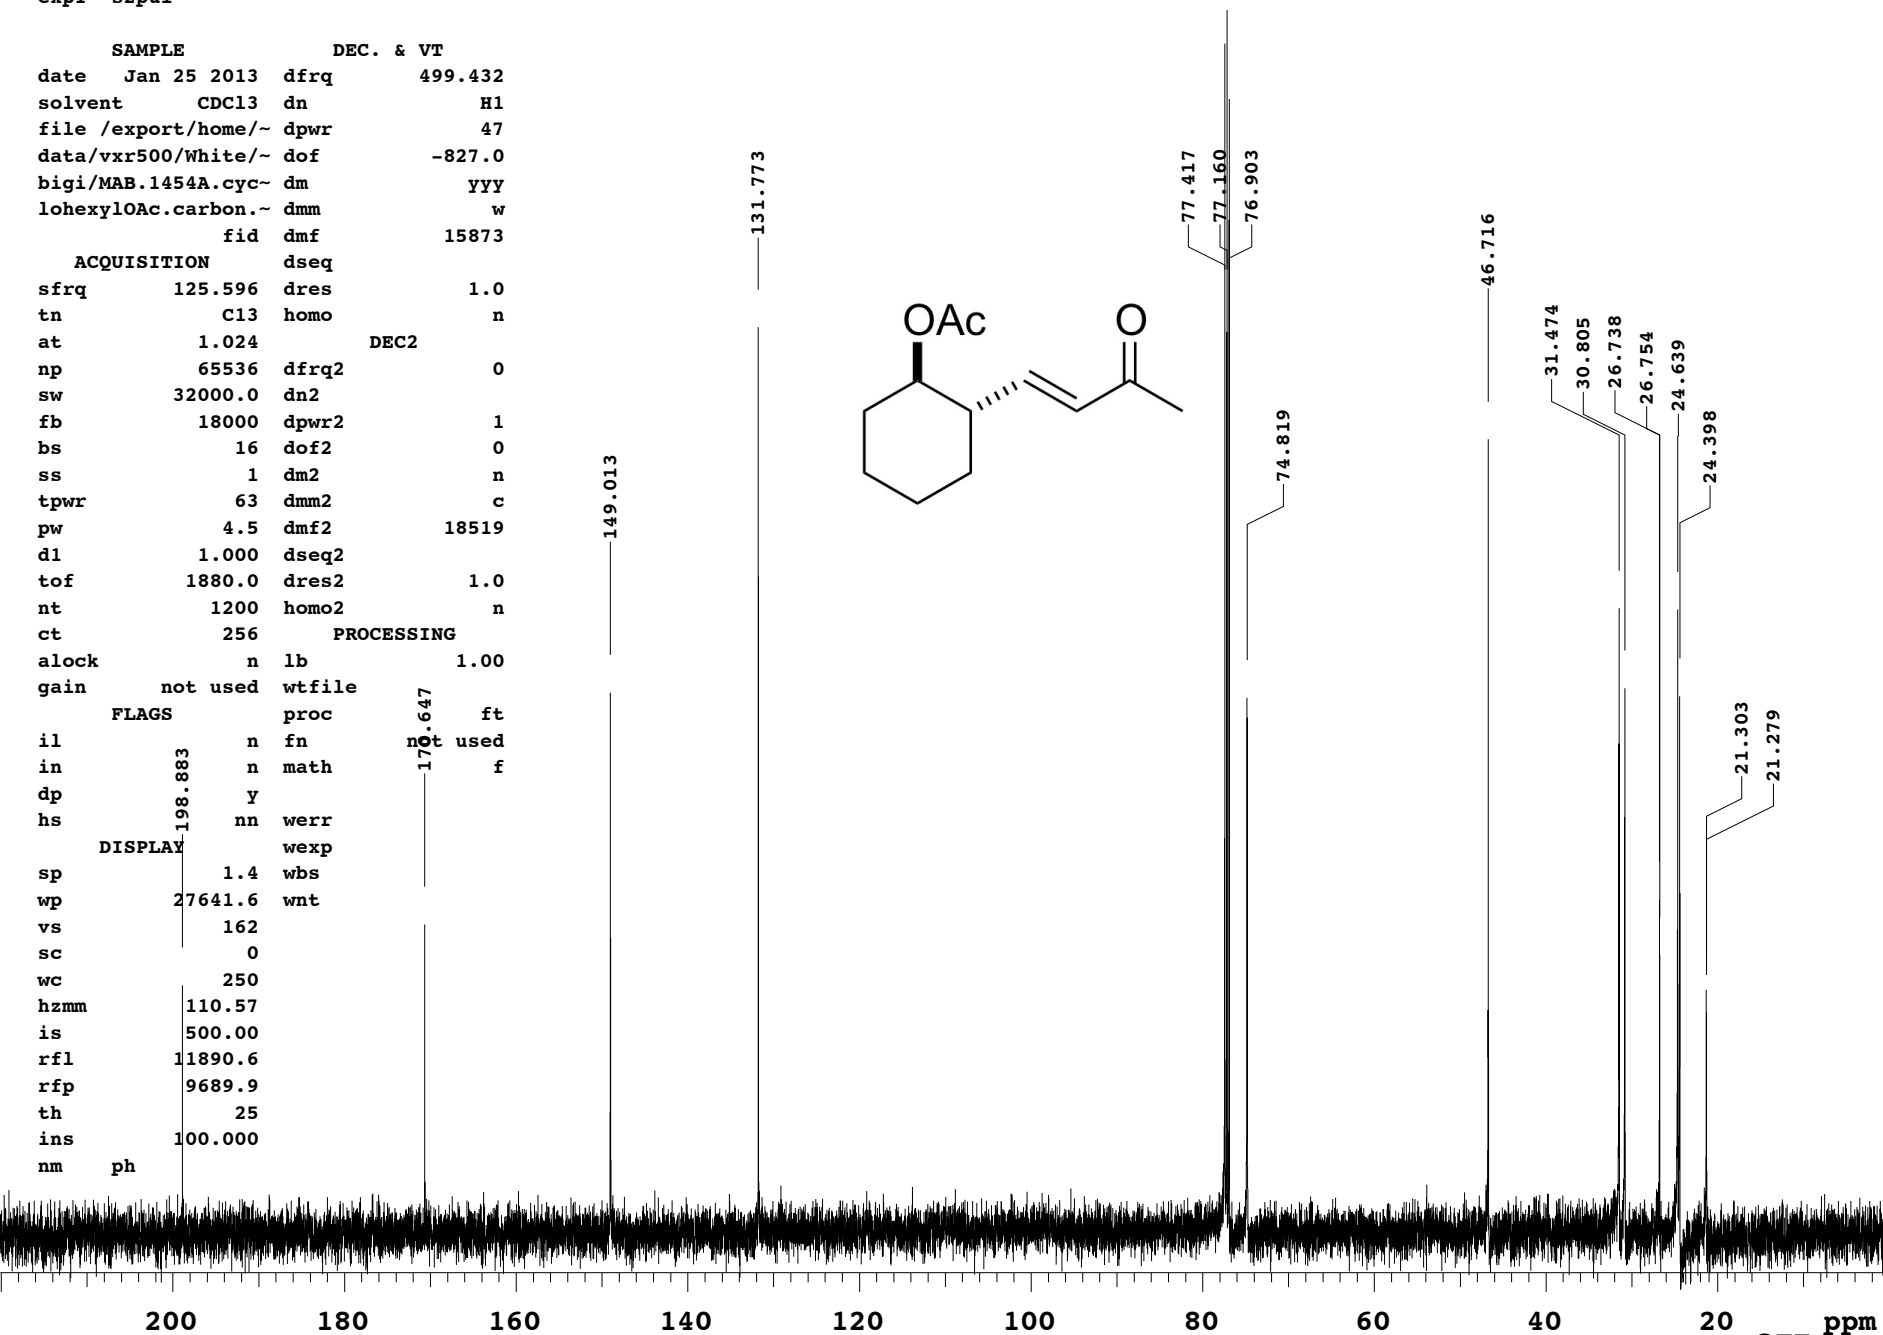

expl s2pul

| SAMPLE              |                | DEC. & VT |         |
|---------------------|----------------|-----------|---------|
| date                | Jan 25 2013    | dfrq      | 500.070 |
| solvent             | CDC13          | dn        | H1      |
| file                | /export/home/~ | dpwr      | 18      |
| data/ui500nb/White~ |                | dof       | 0       |
| /bigi/MAB.1489A.cy~ |                | dm        | nnn     |
| clohexene.proton.f~ |                | dmm       | c       |
|                     |                | id        | dmf     |
|                     |                |           | 200     |

| ACQUISITION |         |       |     |
|-------------|---------|-------|-----|
| sfrq        | 500.070 | dres  | 1.0 |
| tn          | H1      | homo  | n   |
| at          | 4.096   | DEC2  |     |
| np          | 65536   | dfrq2 | 0   |
| sw          | 8000.0  | dn2   |     |
| fb          | 4000    | dpwr2 | 1   |
| bs          | 16      | dof2  | 0   |
| tpwr        | 58      | dm2   | n   |
| pw          | 6.5     | dmm2  | c   |
| d1          | 15.000  | dmf2  | 200 |
| tof         | 0       | dseq2 |     |
| nt          | 4       | dres2 | 1.0 |
| ct          | 4       | homo2 | n   |

| PROCESSING |          |    |      |
|------------|----------|----|------|
| alock      | n        | lb | 0.30 |
| gain       | not used |    |      |

| FLAGS |    |      |          |
|-------|----|------|----------|
| il    | n  | proc | ft       |
| in    | n  | fn   | not used |
| dp    | y  | math | f        |
| hs    | nn |      |          |

| DISPLAY |         |      |  |
|---------|---------|------|--|
| sp      | -971.8  | wexp |  |
| wp      | 6957.3  | wbs  |  |
| vs      | 33      | wnt  |  |
| sc      | 0       |      |  |
| wc      | 250     |      |  |
| hzmm    | 27.83   |      |  |
| is      | 33.57   |      |  |
| rfl     | 1510.6  |      |  |
| rfp     | 0       |      |  |
| th      | 7       |      |  |
| ins     | 100.000 |      |  |
| ai      | ph      |      |  |

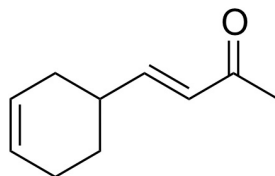

11 10 9 8 7 6 5 4 3 2 1 -0 -1 ppm

S78

expl s2pul

| SAMPLE              |                | DEC. & VT |         |
|---------------------|----------------|-----------|---------|
| date                | Jan 25 2013    | dfrq      | 499.432 |
| solvent             | CDC13          | dn        | H1      |
| file                | /export/home/~ | dpwr      | 47      |
| data/vxr500/White/~ |                | dof       | -827.0  |
| bigi/MAB.1489A.cyc- |                | dm        | YYY     |
| lohexene.carbon.fi- |                | dmm       | w       |
|                     |                | d         | dmf     |
|                     |                |           | 15873   |

| ACQUISITION |         |       |       |
|-------------|---------|-------|-------|
| sfrq        | 125.596 | dseq  |       |
| tn          | C13     | dres  | 1.0   |
| at          | 1.024   | homo  | n     |
|             |         | DEC2  |       |
| np          | 65536   | dfrq2 | 0     |
| sw          | 32000.0 | dn2   |       |
| fb          | 18000   | dpwr2 | 1     |
| bs          | 16      | dof2  | 0     |
| ss          | 1       | dm2   | n     |
| tpwr        | 63      | dmm2  | c     |
| pw          | 4.5     | dmf2  | 18519 |
| d1          | 1.000   | dseq2 |       |
| tof         | 1880.0  | dres2 | 1.0   |
| nt          | 1200    | homo2 | n     |
| ct          | 128     |       |       |

| PROCESSING |          |       |      |
|------------|----------|-------|------|
| alock      | n        | lb    | 1.00 |
| gain       | not used | wfile |      |

| FLAGS |   |      |          |
|-------|---|------|----------|
| il    | n | fn   | not used |
| in    | n | math | f        |

|    |    |      |  |
|----|----|------|--|
| dp | Y  | werr |  |
| hs | nn | wexp |  |

| DISPLA |         |     |  |
|--------|---------|-----|--|
| sp     | 139.1   | wbs |  |
| wp     | 27501.0 | wnt |  |

|    |     |  |  |
|----|-----|--|--|
| vs | 162 |  |  |
| sc | 0   |  |  |

|      |        |  |  |
|------|--------|--|--|
| wc   | 250    |  |  |
| hzmm | 110.00 |  |  |

|     |         |  |  |
|-----|---------|--|--|
| is  | 500.00  |  |  |
| rfl | 11893.6 |  |  |

|     |        |  |  |
|-----|--------|--|--|
| rfp | 9689.9 |  |  |
| th  | 18     |  |  |

|     |         |  |  |
|-----|---------|--|--|
| ins | 100.000 |  |  |
| nm  | ph      |  |  |

152.396

129.533

127.146

125.326

77.417

77.160

76.903

36.661

30.269

27.703

27.042

24.507

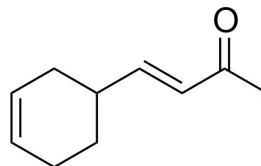

200

180

160

140

120

100

80

60

40

20

S79 ppm

expl s2pul

| SAMPLE              |                | DEC. & VT |         |
|---------------------|----------------|-----------|---------|
| date                | Jan 28 2013    | dfrq      | 500.070 |
| solvent             | CDC13          | dn        | H1      |
| file                | /export/home/~ | dpwr      | 18      |
| data/ui500nb/White~ | dof            |           | 0       |
| /bigi/MAB.1502A.en- | dm             |           | nnn     |
| olether.proton.fid  | dmm            |           | c       |

| ACQUISITION |         |       |     |
|-------------|---------|-------|-----|
| sfrq        | 500.070 | dseq  |     |
| tn          | H1      | dres  | 1.0 |
| at          | 4.096   | homo  | n   |
| np          | 65536   | DEC2  |     |
| sw          | 8000.0  | dfrq2 | 0   |
| fb          | 4000    | dn2   |     |
| bs          | 16      | dpwr2 | 1   |
| tpwr        | 58      | dof2  | 0   |
| pw          | 6.5     | dm2   | n   |
| d1          | 15.000  | dmm2  | c   |
| tof         | 0       | dmf2  | 200 |
| nt          | 4       | dseq2 |     |
| ct          | 4       | dres2 | 1.0 |
| alock       | n       | homo2 | n   |

| PROCESSING |          |        |          |
|------------|----------|--------|----------|
| gain       | not used | lb     | 0.30     |
| il         | n        | wtfile |          |
| in         | n        | proc   | ft       |
| dp         | y        | fn     | not used |
| hs         | nn       | math   | f        |

| DISPLAY |         |      |  |
|---------|---------|------|--|
| sp      | -1007.0 | werr |  |
| wp      | 7004.2  | wexp |  |
| vs      | 41      | wbs  |  |
| sc      | 0       | wnt  |  |
| wc      | 250     |      |  |
| hzmm    | 28.02   |      |  |
| is      | 33.57   |      |  |
| rfl     | 5141.1  |      |  |
| rfp     | 3630.5  |      |  |
| th      | 7       |      |  |
| ins     | 100.000 |      |  |
| ai      | ph      |      |  |

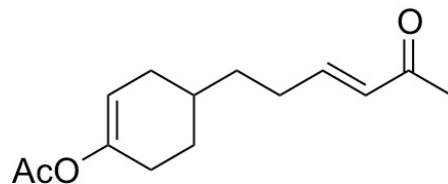

11 10 9 8 7 6 5 4 3 2 1 -0 -1 ppm

S80



expl s2pul

|                     |                |            |          |
|---------------------|----------------|------------|----------|
| SAMPLE              |                | DEC. & VT  |          |
| date                | Jan 26 2013    | dfrq       | 499.432  |
| solvent             | CDC13          | dn         | H1       |
| file                | /export/home/~ | dpwr       | 47       |
| data/vxr500/White/~ | dof            | -827.0     |          |
| bigi/MAB.1502A.eno- | dm             | YYY        |          |
| lether.carbon.fid   | dmm            | w          |          |
| ACQUISITION         |                | dmf        | 15873    |
| sfrq                | 125.596        | dseq       |          |
| tn                  | C13            | dres       | 1.0      |
| at                  | 1.024          | homo       | n        |
| np                  | 65536          | DEC2       |          |
| sw                  | 32000.0        | dfrq2      | 0        |
| fb                  | 18000          | dn2        |          |
| bs                  | 16             | dpwr2      | 1        |
| ss                  | 1              | dof2       | 0        |
| tpwr                | 63             | dm2        | n        |
| pw                  | 4.5            | dmm2       | c        |
| d1                  | 1.000          | dmf2       | 18519    |
| tof                 | 1880.0         | dseq2      |          |
| nt                  | 1200           | dres2      | 1.0      |
| ct                  | 192            | homo2      | n        |
| alock               | n              | PROCESSING |          |
| gain                | not used       | lb         | 1.00     |
| FLAGS               |                | wfile      |          |
| il                  | n              | proc       | ft       |
| in                  | n              | fn         | not used |
| dp                  | y              | math       | f        |
| hs                  | nn             |            |          |
| DISPLAY             |                | werr       |          |
| sp                  | 47.3           | wexp       |          |
| wp                  | 7501.0         | wbs        |          |
| vs                  | 162            | wnt        |          |
| sc                  | 0              |            |          |
| wc                  | 250            |            |          |
| hzmm                | 110.00         |            |          |
| is                  | 500.00         |            |          |
| rfl                 | 11891.6        |            |          |
| rfp                 | 9689.9         |            |          |
| th                  | 16             |            |          |
| ins                 | 100.000        |            |          |
| nm                  | ph             |            |          |

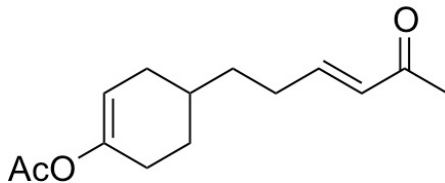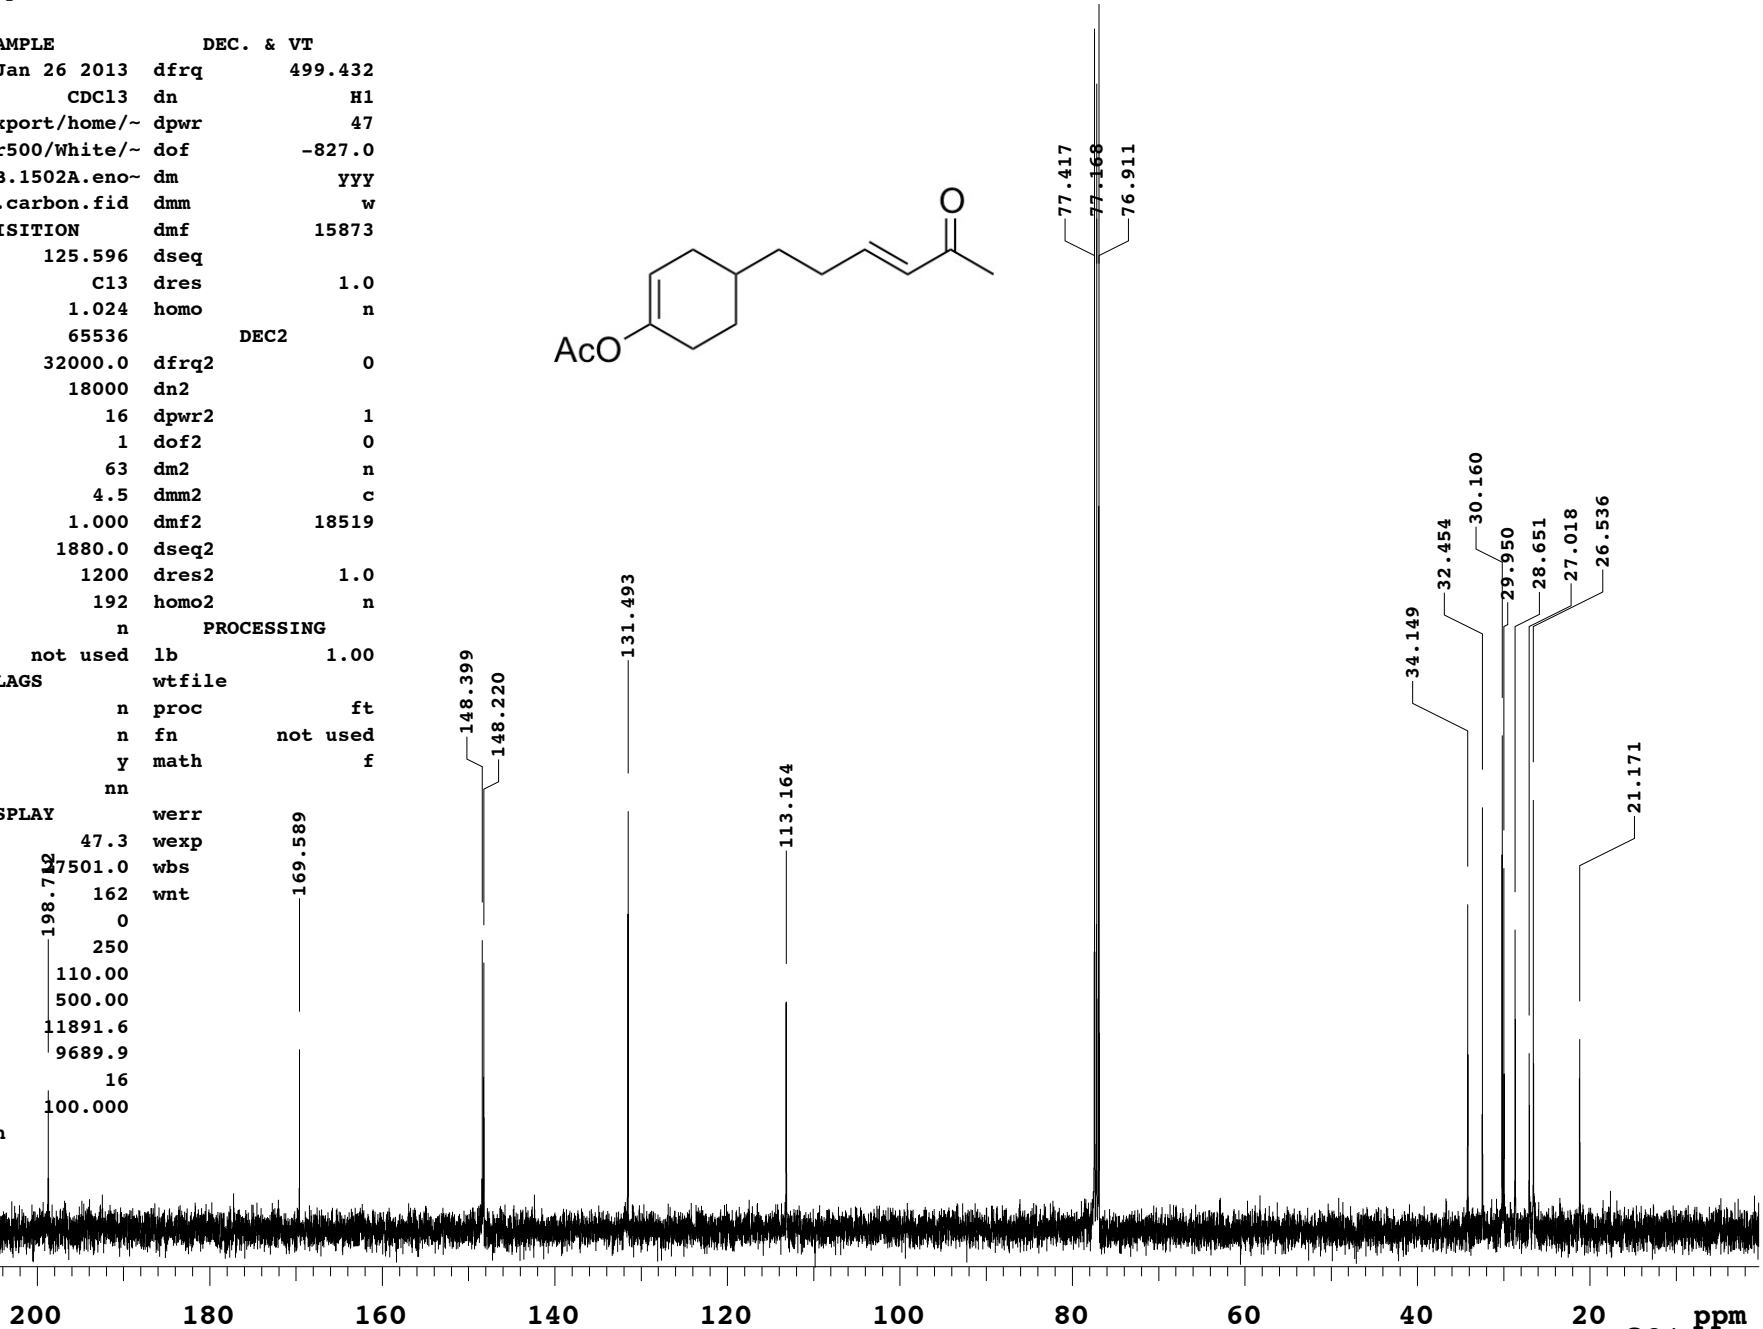

expl s2pul

| SAMPLE              |                | DEC. & VT  |          |
|---------------------|----------------|------------|----------|
| date                | Feb 4 2013     | dfrq       | 500.070  |
| solvent             | CDC13          | dn         | H1       |
| file                | /export/home/~ | dpwr       | 18       |
| data/ui500nb/White~ | dof            |            | 0        |
| /bigi/MAB.1560A.es~ | dm             |            | nnn      |
| tron.proton.fid     | dmm            |            | c        |
| ACQUISITION         |                | dmf        | 200      |
| sfrq                | 500.070        | dseq       |          |
| tn                  | H1             | dres       | 1.0      |
| at                  | 4.096          | homo       | n        |
| np                  | 65536          | DEC2       |          |
| sw                  | 8000.0         | dfrq2      | 0        |
| fb                  | 4000           | dn2        |          |
| bs                  | 16             | dpwr2      | 1        |
| tpwr                | 58             | dof2       | 0        |
| pw                  | 6.5            | dm2        | n        |
| d1                  | 15.000         | dmm2       | c        |
| tof                 | 0              | dmf2       | 200      |
| nt                  | 8              | dseq2      |          |
| ct                  | 8              | dres2      | 1.0      |
| alock               | n              | homo2      | n        |
| gain                | not used       | PROCESSING |          |
| FLAGS               | lb             |            | 0.30     |
| il                  | n              | wtfile     |          |
| in                  | n              | proc       | ft       |
| dp                  | y              | fn         | not used |
| hs                  | nn             | math       | f        |
| DISPLAY             |                |            |          |
| sp                  | -1007.2        | werr       |          |
| wp                  | 6992.4         | wexp       |          |
| vs                  | 64             | wbs        |          |
| sc                  | 0              | wnt        |          |
| wc                  | 250            |            |          |
| hzmm                | 27.97          |            |          |
| is                  | 33.57          |            |          |
| rfl                 | 1510.9         |            |          |
| rfp                 | 0              |            |          |
| th                  | 7              |            |          |
| ins                 | 100.000        |            |          |
| ai                  | ph             |            |          |

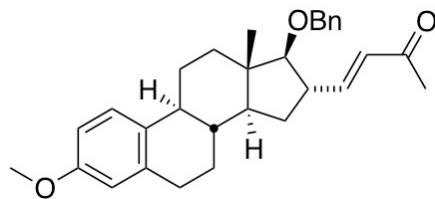

11 10 9 8 7 6 5 4 3 2 1 -0 -1 ppm

expl s2pul

| SAMPLE              |                | DEC. & VT  |          |
|---------------------|----------------|------------|----------|
| date                | Feb 4 2013     | dfrq       | 499.432  |
| solvent             | CDC13          | dn         | H1       |
| file                | /export/home/~ | dpwr       | 47       |
| data/vxr500/White/~ |                | dof        | -827.0   |
| bigi/MAB.1560A.est- |                | dm         | YYY      |
| rone.carbon.fid     |                | dmm        | w        |
| ACQUISITION         |                |            |          |
| sfrq                | 125.596        | dseq       |          |
| tn                  | C13            | dres       | 1.0      |
| at                  | 1.024          | homo       | n        |
| np                  | 65536          | DEC2       |          |
| sw                  | 32000.0        | dfrq2      | 0        |
| fb                  | 18000          | dn2        |          |
| bs                  | 16             | dpwr2      | 1        |
| ss                  | 1              | dof2       | 0        |
| tpwr                | 63             | dm2        | n        |
| pw                  | 4.5            | dmm2       | c        |
| d1                  | 1.000          | dmf2       | 18519    |
| tof                 | 1880.0         | dseq2      |          |
| nt                  | 1200           | dres2      | 1.0      |
| ct                  | 288            | homo2      | n        |
| alock               | n              | PROCESSING |          |
| gain                | not used       | lb         | 1.00     |
| FLAGS               |                | wtfile     |          |
| il                  | n              | proc       | ft       |
| in                  | n              | fn         | not used |
| dp                  | y              | math       | f        |
| hs                  | nn             |            |          |
| DISPLAY             |                | werr       |          |
| sp                  | 198.213        | 47.3       | wexp     |
| wp                  | 547.9          | wbs        |          |
| vs                  | 162            | wnt        |          |
| sc                  | 0              |            |          |
| wc                  | 250            |            |          |
| hzmm                | 110.19         |            |          |
| is                  | 500.00         |            |          |
| rfl                 | 11891.6        |            |          |
| rfp                 | 9689.9         |            |          |
| th                  | 12             |            |          |
| ins                 | 100.000        |            |          |
| nm                  | ph             |            |          |

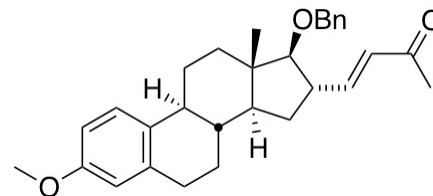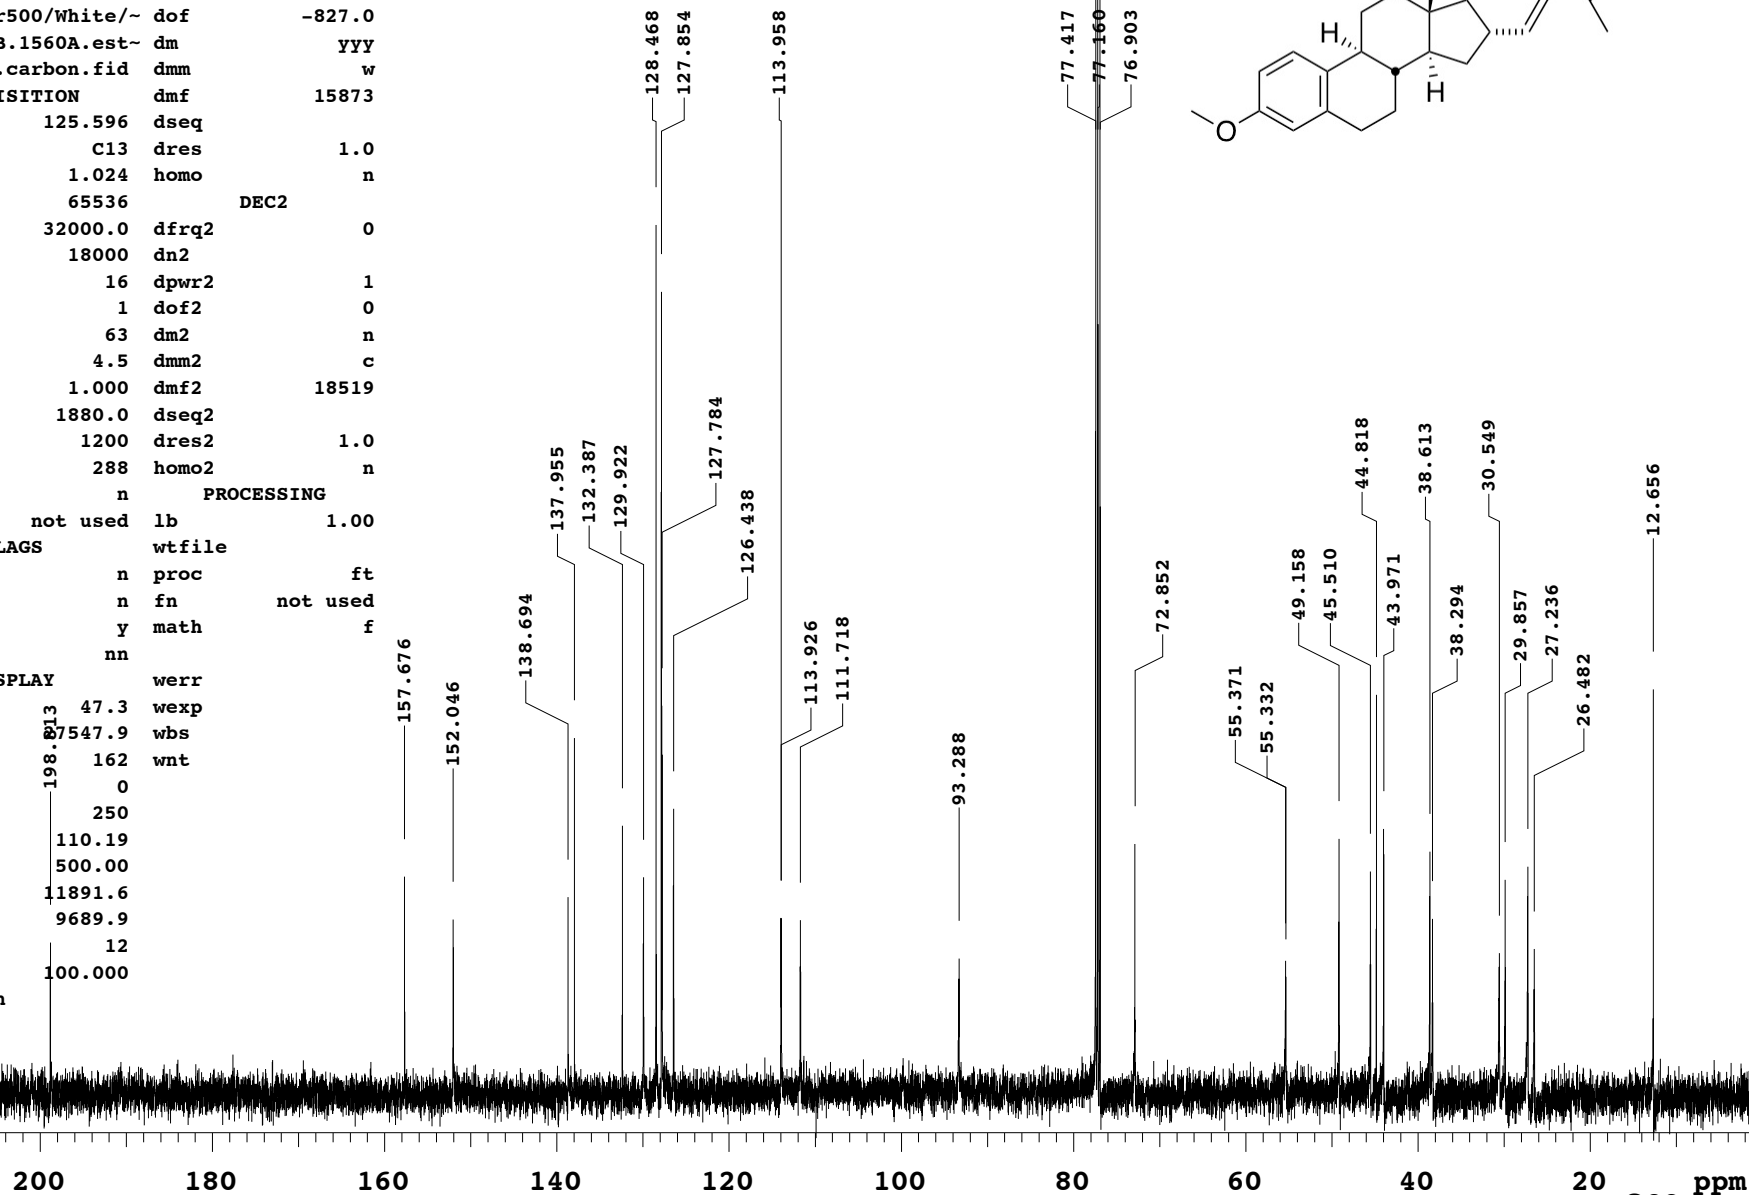

```

=====
Injection Date   : 8/3/2012 9:31:46 AM
Sample Name     : MAB.1569A.rac           Location  : Vial 101
Acq. Operator   : PEG
Acq. Instrument : Chiral GC              Inj Volume: Manually
Acq. Method     : C:\HPCHEM\3\METHODS\GTA120.M
Last changed    : 8/2/2012 10:46:24 PM by PEG
Analysis Method : C:\HPCHEM\3\METHODS\GTABAKE.M
Last changed    : 8/15/2012 9:37:42 AM by PEG
                  (modified after loading)
=====

```

## Test

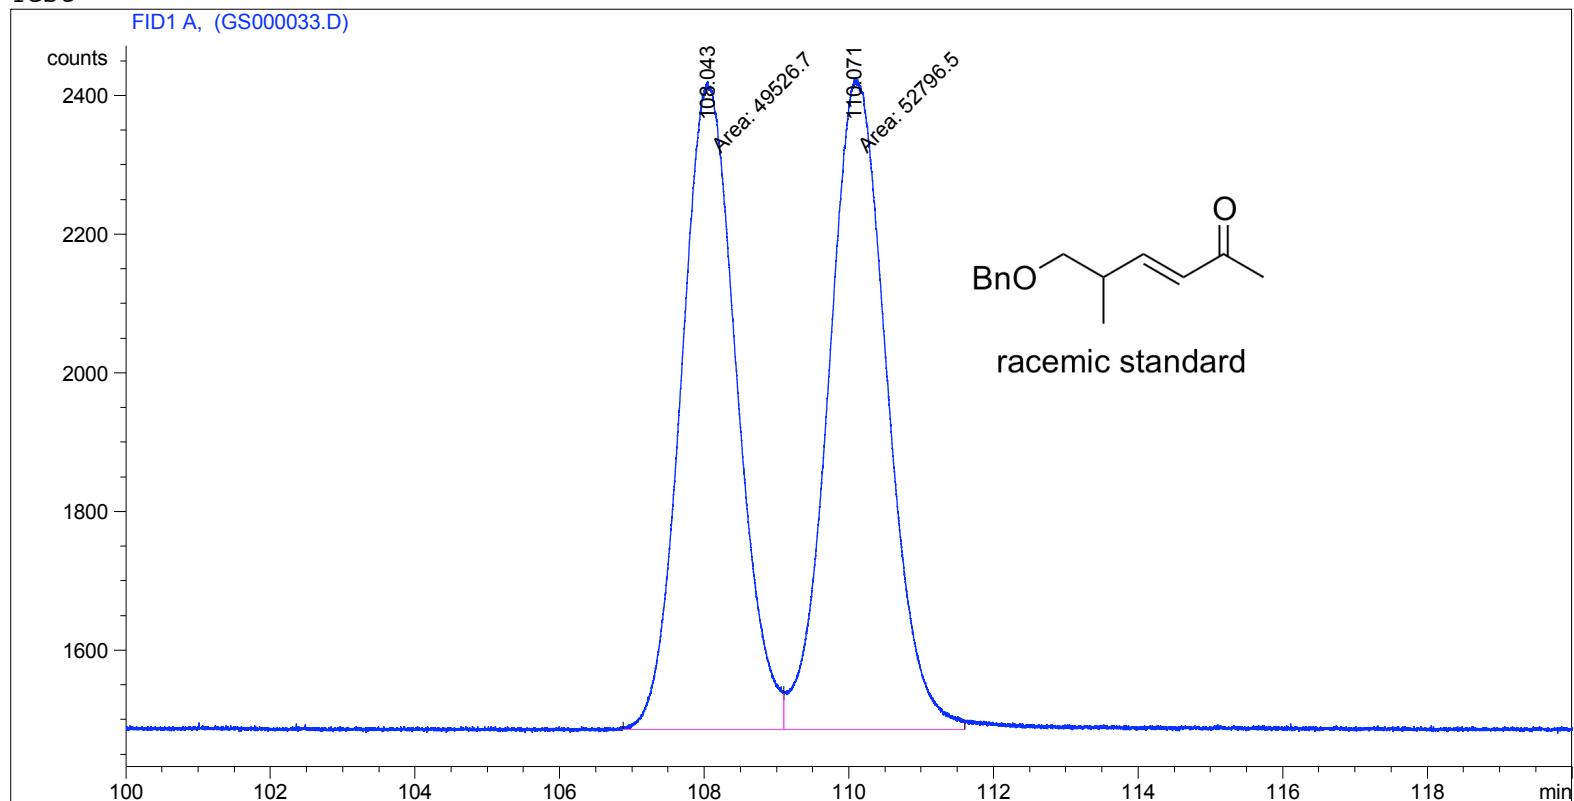

```

=====
Area Percent Report
=====

```

```

Sorted By      :      Signal
Multiplier     :      1.0000
Dilution      :      1.0000
Use Multiplier & Dilution Factor with ISTDs

```

Signal 1: FID1 A,

| Peak # | RetTime [min] | Type | Width [min] | Area counts*s | Height [counts] | Area %   |
|--------|---------------|------|-------------|---------------|-----------------|----------|
| 1      | 108.043       | MM   | 0.8823      | 4.95267e4     | 935.56696       | 48.40220 |
| 2      | 110.071       | MM   | 0.9366      | 5.27965e4     | 939.53485       | 51.59780 |

```
Totals :                1.02323e5  1875.10181
```

Results obtained with enhanced integrator!

```

=====
*** End of Report ***
=====

```

=====  
Injection Date : 8/2/2012 7:26:25 PM  
Sample Name : MAB.1540A  
Acq. Operator : PEG  
Acq. Instrument : Chiral GC  
Acq. Method : C:\HPCHEM\3\METHODS\GTA120.M  
Last changed : 8/2/2012 7:21:08 PM by PEG  
(modified after loading)  
Analysis Method : C:\HPCHEM\3\METHODS\GTABAKE.M  
Last changed : 8/3/2012 9:12:48 AM by PEG  
(modified after loading)

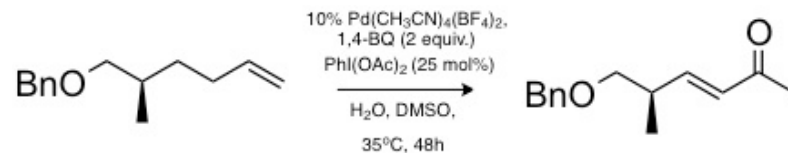

Test

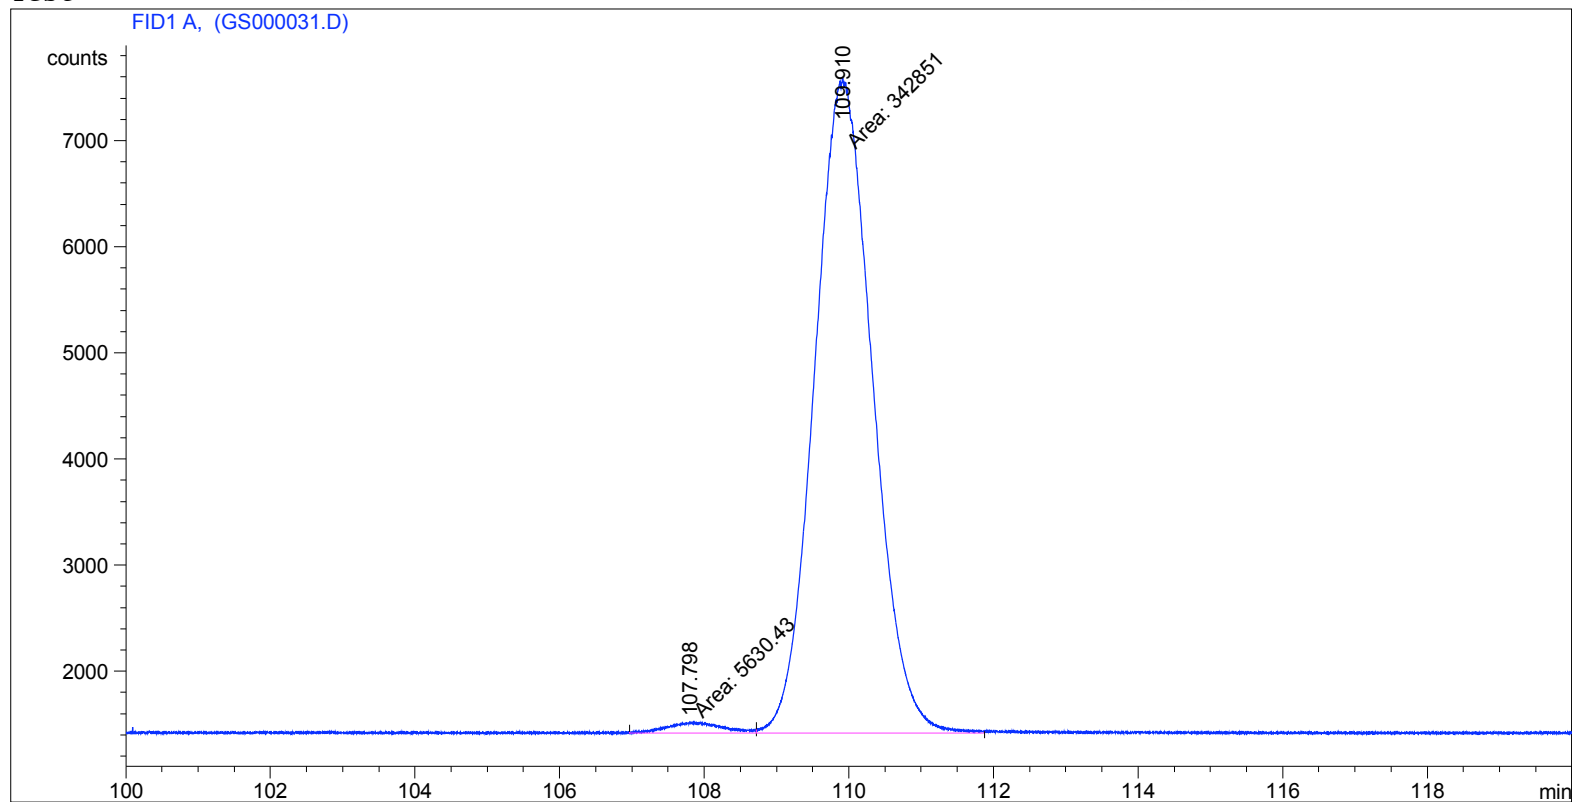

=====  
Area Percent Report  
=====

Sorted By : Signal  
Multiplier : 1.0000  
Dilution : 1.0000  
Use Multiplier & Dilution Factor with ISTDs

Signal 1: FID1 A,

| Peak # | RetTime [min] | Type | Width [min] | Area counts*s | Height [counts] | Area %   |
|--------|---------------|------|-------------|---------------|-----------------|----------|
| 1      | 107.798       | MM   | 0.9230      | 5630.42578    | 101.66761       | 1.61570  |
| 2      | 109.910       | MM   | 0.9259      | 3.42851e5     | 6171.42236      | 98.38430 |

Totals : 3.48482e5 6273.08997

Results obtained with enhanced integrator!

=====  
\*\*\* End of Report \*\*\*

expl s2pul

| SAMPLE              |                | DEC. & VT  |          |
|---------------------|----------------|------------|----------|
| date                | Mar 6 2013     | dfrq       | 499.693  |
| solvent             | CDC13          | dn         | H1       |
| file                | /export/home/~ | dpwr       | 20       |
| data/u500/White/bi- |                | dof        | 0        |
| gi/MAB.1610A.colum- |                | dm         | nnn      |
| ned.fid             |                | dmm        | c        |
| ACQUISITION         |                | dmf        |          |
| sfrq                | 499.693        | dseq       | 200      |
| tn                  | H1             | dres       | 1.0      |
| at                  | 4.665          | homo       | n        |
| np                  | 65536          | DEC2       |          |
| sw                  | 7024.9         | dfrq2      | 0        |
| fb                  | 4000           | dn2        |          |
| bs                  | 4              | dpwr2      | 1        |
| tpwr                | 60             | dof2       | 0        |
| pw                  | 6.5            | dm2        | n        |
| d1                  | 10.000         | dmm2       | c        |
| tof                 | 2.0            | dmf2       | 200      |
| nt                  | 4              | dseq2      |          |
| ct                  | 4              | dres2      | 1.0      |
| alock               | n              | homo2      | n        |
| gain                | not used       | PROCESSING |          |
| FLAGS               | lb             |            | 0.30     |
| il                  | n              | wtfile     |          |
| in                  | n              | proc       | ft       |
| dp                  | y              | fn         | not used |
| hs                  | nn             | math       | f        |
| DISPLAY             |                |            |          |
| sp                  | -1011.9        | werr       |          |
| wp                  | 7024.7         | wexp       |          |
| vs                  | 9              | wbs        |          |
| sc                  | 0              | wnt        |          |
| wc                  | 250            |            |          |
| hzmm                | 17.01          |            |          |
| is                  | 33.57          |            |          |
| rfl                 | 4639.9         |            |          |
| rfp                 | 3627.8         |            |          |
| th                  | 7              |            |          |
| ins                 | 100.000        |            |          |
| ai                  | ph             |            |          |

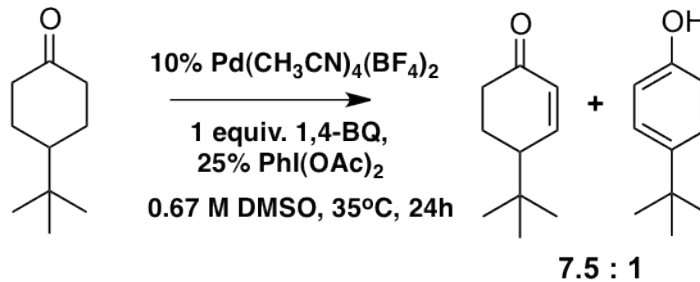

11 10 9 8 7 6 5 4 3 2 1 -0 -1 ppm
